# Supplementary material for: Proper Immune Response Depends on Early Exposure to Gut Microbiota in Broiler Chicks
Source: Front Physiol. 2021 Oct 15;12:758183. doi: 10.3389/fphys.2021.758183 (PMC8554228; doi:10.3389/fphys.2021.758183)
Supplement: Supplementary file 1 [file Table_1.XLSX]

## Sheet: PPI interaction LECT2
PPI interaction LECT2
node1	node2	node1 accession	node2 accession	node1 annotation	node2 annotation	coexpr. score
CAMP	CATHL3	ENSGALP00000030658	ENSGALP00000042184	Cathelicidin-2; Binds bacterial lipopolysaccharide (LPS). Has potent antimicrobial activity against Gram-positive and Gram-negative bacteria (in vitro). Has hemolytic activity (in vitro). May play a role in the innate immune response	Cathelicidin-1; Binds bacterial lipopolysaccharide (LPS). Has potent antimicrobial activity against Gram-positive and Gram-negative bacteria (in vitro). Has hemolytic activity (in vitro). May play a role in the innate immune response	0.785
CAMP	GAL1	ENSGALP00000030658	ENSGALP00000035925	Cathelicidin-2; Binds bacterial lipopolysaccharide (LPS). Has potent antimicrobial activity against Gram-positive and Gram-negative bacteria (in vitro). Has hemolytic activity (in vitro). May play a role in the innate immune response	Gallinacin-1; Has bactericidal activity. Potent activity against E.coli ML-35, L.monocytogenes EGD and C.albicans	0.785
CAMP	GAL2	ENSGALP00000030658	ENSGALP00000030904	Cathelicidin-2; Binds bacterial lipopolysaccharide (LPS). Has potent antimicrobial activity against Gram-positive and Gram-negative bacteria (in vitro). Has hemolytic activity (in vitro). May play a role in the innate immune response	Gallinacin-2; Potent antibacterial activity against the Gram-negative bacterium E.coli ML-35, and against the Gram-positive bacterium L.monocytogenes EGD. Lacks antifungal activity against C.albicans	0.808
CAMP	GAL6	ENSGALP00000030658	ENSGALP00000026847	Cathelicidin-2; Binds bacterial lipopolysaccharide (LPS). Has potent antimicrobial activity against Gram-positive and Gram-negative bacteria (in vitro). Has hemolytic activity (in vitro). May play a role in the innate immune response	Gallinacin-6; Has bactericidal activity. Potent activity against S.typhimurium and S.entiriditis	0.789
CAMP	GAL7	ENSGALP00000030658	ENSGALP00000030905	Cathelicidin-2; Binds bacterial lipopolysaccharide (LPS). Has potent antimicrobial activity against Gram-positive and Gram-negative bacteria (in vitro). Has hemolytic activity (in vitro). May play a role in the innate immune response	Gallinacin-7; Has bactericidal activity	0.814
CAMP	LECT2	ENSGALP00000030658	ENSGALP00000010210	Cathelicidin-2; Binds bacterial lipopolysaccharide (LPS). Has potent antimicrobial activity against Gram-positive and Gram-negative bacteria (in vitro). Has hemolytic activity (in vitro). May play a role in the innate immune response	Myeloid protein 1; Gallus gallus leukocyte cell-derived chemotaxin 2 (LECT2), mRNA	0.976
CAMP	SERPINB10	ENSGALP00000030658	ENSGALP00000020960	Cathelicidin-2; Binds bacterial lipopolysaccharide (LPS). Has potent antimicrobial activity against Gram-positive and Gram-negative bacteria (in vitro). Has hemolytic activity (in vitro). May play a role in the innate immune response	Heterochromatin-associated protein MENT; DNA-binding protein that promotes DNA condensation into transcriptionally inactive heterochromatin in terminally differentiated avian blood cells. Promotes tight packing of nucleosomes into spherical clusters by binding to linker DNA and subsequent oligomerization. Acts as a cysteine protease inhibitor towards CTSL (cathepsin L1) and CTSV (cathepsin L2), b…	0.255
CATHL3	CAMP	ENSGALP00000042184	ENSGALP00000030658	Cathelicidin-1; Binds bacterial lipopolysaccharide (LPS). Has potent antimicrobial activity against Gram-positive and Gram-negative bacteria (in vitro). Has hemolytic activity (in vitro). May play a role in the innate immune response	Cathelicidin-2; Binds bacterial lipopolysaccharide (LPS). Has potent antimicrobial activity against Gram-positive and Gram-negative bacteria (in vitro). Has hemolytic activity (in vitro). May play a role in the innate immune response	0.785
CATHL3	GAL1	ENSGALP00000042184	ENSGALP00000035925	Cathelicidin-1; Binds bacterial lipopolysaccharide (LPS). Has potent antimicrobial activity against Gram-positive and Gram-negative bacteria (in vitro). Has hemolytic activity (in vitro). May play a role in the innate immune response	Gallinacin-1; Has bactericidal activity. Potent activity against E.coli ML-35, L.monocytogenes EGD and C.albicans	0.56
CATHL3	GAL2	ENSGALP00000042184	ENSGALP00000030904	Cathelicidin-1; Binds bacterial lipopolysaccharide (LPS). Has potent antimicrobial activity against Gram-positive and Gram-negative bacteria (in vitro). Has hemolytic activity (in vitro). May play a role in the innate immune response	Gallinacin-2; Potent antibacterial activity against the Gram-negative bacterium E.coli ML-35, and against the Gram-positive bacterium L.monocytogenes EGD. Lacks antifungal activity against C.albicans	0.782
CATHL3	GAL6	ENSGALP00000042184	ENSGALP00000026847	Cathelicidin-1; Binds bacterial lipopolysaccharide (LPS). Has potent antimicrobial activity against Gram-positive and Gram-negative bacteria (in vitro). Has hemolytic activity (in vitro). May play a role in the innate immune response	Gallinacin-6; Has bactericidal activity. Potent activity against S.typhimurium and S.entiriditis	0.781
CATHL3	LECT2	ENSGALP00000042184	ENSGALP00000010210	Cathelicidin-1; Binds bacterial lipopolysaccharide (LPS). Has potent antimicrobial activity against Gram-positive and Gram-negative bacteria (in vitro). Has hemolytic activity (in vitro). May play a role in the innate immune response	Myeloid protein 1; Gallus gallus leukocyte cell-derived chemotaxin 2 (LECT2), mRNA	0.526
GAL1	CAMP	ENSGALP00000035925	ENSGALP00000030658	Gallinacin-1; Has bactericidal activity. Potent activity against E.coli ML-35, L.monocytogenes EGD and C.albicans	Cathelicidin-2; Binds bacterial lipopolysaccharide (LPS). Has potent antimicrobial activity against Gram-positive and Gram-negative bacteria (in vitro). Has hemolytic activity (in vitro). May play a role in the innate immune response	0.785
GAL1	CATHL3	ENSGALP00000035925	ENSGALP00000042184	Gallinacin-1; Has bactericidal activity. Potent activity against E.coli ML-35, L.monocytogenes EGD and C.albicans	Cathelicidin-1; Binds bacterial lipopolysaccharide (LPS). Has potent antimicrobial activity against Gram-positive and Gram-negative bacteria (in vitro). Has hemolytic activity (in vitro). May play a role in the innate immune response	0.56
GAL1	GAL2	ENSGALP00000035925	ENSGALP00000030904	Gallinacin-1; Has bactericidal activity. Potent activity against E.coli ML-35, L.monocytogenes EGD and C.albicans	Gallinacin-2; Potent antibacterial activity against the Gram-negative bacterium E.coli ML-35, and against the Gram-positive bacterium L.monocytogenes EGD. Lacks antifungal activity against C.albicans	0.785
GAL1	GAL6	ENSGALP00000035925	ENSGALP00000026847	Gallinacin-1; Has bactericidal activity. Potent activity against E.coli ML-35, L.monocytogenes EGD and C.albicans	Gallinacin-6; Has bactericidal activity. Potent activity against S.typhimurium and S.entiriditis	0.785
GAL1	LECT2	ENSGALP00000035925	ENSGALP00000010210	Gallinacin-1; Has bactericidal activity. Potent activity against E.coli ML-35, L.monocytogenes EGD and C.albicans	Myeloid protein 1; Gallus gallus leukocyte cell-derived chemotaxin 2 (LECT2), mRNA	0.785
GAL1	SERPINB10	ENSGALP00000035925	ENSGALP00000020960	Gallinacin-1; Has bactericidal activity. Potent activity against E.coli ML-35, L.monocytogenes EGD and C.albicans	Heterochromatin-associated protein MENT; DNA-binding protein that promotes DNA condensation into transcriptionally inactive heterochromatin in terminally differentiated avian blood cells. Promotes tight packing of nucleosomes into spherical clusters by binding to linker DNA and subsequent oligomerization. Acts as a cysteine protease inhibitor towards CTSL (cathepsin L1) and CTSV (cathepsin L2), b…	0.362
GAL2	CAMP	ENSGALP00000030904	ENSGALP00000030658	Gallinacin-2; Potent antibacterial activity against the Gram-negative bacterium E.coli ML-35, and against the Gram-positive bacterium L.monocytogenes EGD. Lacks antifungal activity against C.albicans	Cathelicidin-2; Binds bacterial lipopolysaccharide (LPS). Has potent antimicrobial activity against Gram-positive and Gram-negative bacteria (in vitro). Has hemolytic activity (in vitro). May play a role in the innate immune response	0.808
GAL2	CATHL3	ENSGALP00000030904	ENSGALP00000042184	Gallinacin-2; Potent antibacterial activity against the Gram-negative bacterium E.coli ML-35, and against the Gram-positive bacterium L.monocytogenes EGD. Lacks antifungal activity against C.albicans	Cathelicidin-1; Binds bacterial lipopolysaccharide (LPS). Has potent antimicrobial activity against Gram-positive and Gram-negative bacteria (in vitro). Has hemolytic activity (in vitro). May play a role in the innate immune response	0.782
GAL2	GAL1	ENSGALP00000030904	ENSGALP00000035925	Gallinacin-2; Potent antibacterial activity against the Gram-negative bacterium E.coli ML-35, and against the Gram-positive bacterium L.monocytogenes EGD. Lacks antifungal activity against C.albicans	Gallinacin-1; Has bactericidal activity. Potent activity against E.coli ML-35, L.monocytogenes EGD and C.albicans	0.785
GAL2	GAL6	ENSGALP00000030904	ENSGALP00000026847	Gallinacin-2; Potent antibacterial activity against the Gram-negative bacterium E.coli ML-35, and against the Gram-positive bacterium L.monocytogenes EGD. Lacks antifungal activity against C.albicans	Gallinacin-6; Has bactericidal activity. Potent activity against S.typhimurium and S.entiriditis	0.788
GAL2	GAL7	ENSGALP00000030904	ENSGALP00000030905	Gallinacin-2; Potent antibacterial activity against the Gram-negative bacterium E.coli ML-35, and against the Gram-positive bacterium L.monocytogenes EGD. Lacks antifungal activity against C.albicans	Gallinacin-7; Has bactericidal activity	0.904
GAL2	LECT2	ENSGALP00000030904	ENSGALP00000010210	Gallinacin-2; Potent antibacterial activity against the Gram-negative bacterium E.coli ML-35, and against the Gram-positive bacterium L.monocytogenes EGD. Lacks antifungal activity against C.albicans	Myeloid protein 1; Gallus gallus leukocyte cell-derived chemotaxin 2 (LECT2), mRNA	0.999
GAL2	SERPINB10	ENSGALP00000030904	ENSGALP00000020960	Gallinacin-2; Potent antibacterial activity against the Gram-negative bacterium E.coli ML-35, and against the Gram-positive bacterium L.monocytogenes EGD. Lacks antifungal activity against C.albicans	Heterochromatin-associated protein MENT; DNA-binding protein that promotes DNA condensation into transcriptionally inactive heterochromatin in terminally differentiated avian blood cells. Promotes tight packing of nucleosomes into spherical clusters by binding to linker DNA and subsequent oligomerization. Acts as a cysteine protease inhibitor towards CTSL (cathepsin L1) and CTSV (cathepsin L2), b…	0.465
GAL6	CAMP	ENSGALP00000026847	ENSGALP00000030658	Gallinacin-6; Has bactericidal activity. Potent activity against S.typhimurium and S.entiriditis	Cathelicidin-2; Binds bacterial lipopolysaccharide (LPS). Has potent antimicrobial activity against Gram-positive and Gram-negative bacteria (in vitro). Has hemolytic activity (in vitro). May play a role in the innate immune response	0.789
GAL6	CATHL3	ENSGALP00000026847	ENSGALP00000042184	Gallinacin-6; Has bactericidal activity. Potent activity against S.typhimurium and S.entiriditis	Cathelicidin-1; Binds bacterial lipopolysaccharide (LPS). Has potent antimicrobial activity against Gram-positive and Gram-negative bacteria (in vitro). Has hemolytic activity (in vitro). May play a role in the innate immune response	0.781
GAL6	GAL1	ENSGALP00000026847	ENSGALP00000035925	Gallinacin-6; Has bactericidal activity. Potent activity against S.typhimurium and S.entiriditis	Gallinacin-1; Has bactericidal activity. Potent activity against E.coli ML-35, L.monocytogenes EGD and C.albicans	0.785
GAL6	GAL2	ENSGALP00000026847	ENSGALP00000030904	Gallinacin-6; Has bactericidal activity. Potent activity against S.typhimurium and S.entiriditis	Gallinacin-2; Potent antibacterial activity against the Gram-negative bacterium E.coli ML-35, and against the Gram-positive bacterium L.monocytogenes EGD. Lacks antifungal activity against C.albicans	0.788
GAL6	GAL7	ENSGALP00000026847	ENSGALP00000030905	Gallinacin-6; Has bactericidal activity. Potent activity against S.typhimurium and S.entiriditis	Gallinacin-7; Has bactericidal activity	0.467
GAL6	LECT2	ENSGALP00000026847	ENSGALP00000010210	Gallinacin-6; Has bactericidal activity. Potent activity against S.typhimurium and S.entiriditis	Myeloid protein 1; Gallus gallus leukocyte cell-derived chemotaxin 2 (LECT2), mRNA	0.792
GAL6	SERPINB10	ENSGALP00000026847	ENSGALP00000020960	Gallinacin-6; Has bactericidal activity. Potent activity against S.typhimurium and S.entiriditis	Heterochromatin-associated protein MENT; DNA-binding protein that promotes DNA condensation into transcriptionally inactive heterochromatin in terminally differentiated avian blood cells. Promotes tight packing of nucleosomes into spherical clusters by binding to linker DNA and subsequent oligomerization. Acts as a cysteine protease inhibitor towards CTSL (cathepsin L1) and CTSV (cathepsin L2), b…	0.465
GAL7	CAMP	ENSGALP00000030905	ENSGALP00000030658	Gallinacin-7; Has bactericidal activity	Cathelicidin-2; Binds bacterial lipopolysaccharide (LPS). Has potent antimicrobial activity against Gram-positive and Gram-negative bacteria (in vitro). Has hemolytic activity (in vitro). May play a role in the innate immune response	0.814
GAL7	GAL2	ENSGALP00000030905	ENSGALP00000030904	Gallinacin-7; Has bactericidal activity	Gallinacin-2; Potent antibacterial activity against the Gram-negative bacterium E.coli ML-35, and against the Gram-positive bacterium L.monocytogenes EGD. Lacks antifungal activity against C.albicans	0.904
GAL7	GAL6	ENSGALP00000030905	ENSGALP00000026847	Gallinacin-7; Has bactericidal activity	Gallinacin-6; Has bactericidal activity. Potent activity against S.typhimurium and S.entiriditis	0.467
GAL7	LECT2	ENSGALP00000030905	ENSGALP00000010210	Gallinacin-7; Has bactericidal activity	Myeloid protein 1; Gallus gallus leukocyte cell-derived chemotaxin 2 (LECT2), mRNA	0.904
LECT1	LECT2	ENSGALP00000027337	ENSGALP00000010210	Leukocyte cell-derived chemotaxin 1; Bifunctional growth regulator. May contribute to the rapid growth of cartilage and vascular invasion prior to the replacement of cartilage by bone during endochondral bone development. Plays a role as antiangiogenic factor in cardiac valves to suppress neovascularization (By similarity); Belongs to the chondromodulin-1 family	Myeloid protein 1; Gallus gallus leukocyte cell-derived chemotaxin 2 (LECT2), mRNA	0.056
LECT2	CAMP	ENSGALP00000010210	ENSGALP00000030658	Myeloid protein 1; Gallus gallus leukocyte cell-derived chemotaxin 2 (LECT2), mRNA	Cathelicidin-2; Binds bacterial lipopolysaccharide (LPS). Has potent antimicrobial activity against Gram-positive and Gram-negative bacteria (in vitro). Has hemolytic activity (in vitro). May play a role in the innate immune response	0.976
LECT2	CATHL3	ENSGALP00000010210	ENSGALP00000042184	Myeloid protein 1; Gallus gallus leukocyte cell-derived chemotaxin 2 (LECT2), mRNA	Cathelicidin-1; Binds bacterial lipopolysaccharide (LPS). Has potent antimicrobial activity against Gram-positive and Gram-negative bacteria (in vitro). Has hemolytic activity (in vitro). May play a role in the innate immune response	0.526
LECT2	GAL1	ENSGALP00000010210	ENSGALP00000035925	Myeloid protein 1; Gallus gallus leukocyte cell-derived chemotaxin 2 (LECT2), mRNA	Gallinacin-1; Has bactericidal activity. Potent activity against E.coli ML-35, L.monocytogenes EGD and C.albicans	0.785
LECT2	GAL2	ENSGALP00000010210	ENSGALP00000030904	Myeloid protein 1; Gallus gallus leukocyte cell-derived chemotaxin 2 (LECT2), mRNA	Gallinacin-2; Potent antibacterial activity against the Gram-negative bacterium E.coli ML-35, and against the Gram-positive bacterium L.monocytogenes EGD. Lacks antifungal activity against C.albicans	0.999
LECT2	GAL6	ENSGALP00000010210	ENSGALP00000026847	Myeloid protein 1; Gallus gallus leukocyte cell-derived chemotaxin 2 (LECT2), mRNA	Gallinacin-6; Has bactericidal activity. Potent activity against S.typhimurium and S.entiriditis	0.792
LECT2	GAL7	ENSGALP00000010210	ENSGALP00000030905	Myeloid protein 1; Gallus gallus leukocyte cell-derived chemotaxin 2 (LECT2), mRNA	Gallinacin-7; Has bactericidal activity	0.904
LECT2	LECT1	ENSGALP00000010210	ENSGALP00000027337	Myeloid protein 1; Gallus gallus leukocyte cell-derived chemotaxin 2 (LECT2), mRNA	Leukocyte cell-derived chemotaxin 1; Bifunctional growth regulator. May contribute to the rapid growth of cartilage and vascular invasion prior to the replacement of cartilage by bone during endochondral bone development. Plays a role as antiangiogenic factor in cardiac valves to suppress neovascularization (By similarity); Belongs to the chondromodulin-1 family	0.056
LECT2	SERPINB10	ENSGALP00000010210	ENSGALP00000020960	Myeloid protein 1; Gallus gallus leukocyte cell-derived chemotaxin 2 (LECT2), mRNA	Heterochromatin-associated protein MENT; DNA-binding protein that promotes DNA condensation into transcriptionally inactive heterochromatin in terminally differentiated avian blood cells. Promotes tight packing of nucleosomes into spherical clusters by binding to linker DNA and subsequent oligomerization. Acts as a cysteine protease inhibitor towards CTSL (cathepsin L1) and CTSV (cathepsin L2), b…	0.362
SERPINB10	CAMP	ENSGALP00000020960	ENSGALP00000030658	Heterochromatin-associated protein MENT; DNA-binding protein that promotes DNA condensation into transcriptionally inactive heterochromatin in terminally differentiated avian blood cells. Promotes tight packing of nucleosomes into spherical clusters by binding to linker DNA and subsequent oligomerization. Acts as a cysteine protease inhibitor towards CTSL (cathepsin L1) and CTSV (cathepsin L2), b…	Cathelicidin-2; Binds bacterial lipopolysaccharide (LPS). Has potent antimicrobial activity against Gram-positive and Gram-negative bacteria (in vitro). Has hemolytic activity (in vitro). May play a role in the innate immune response	0.255
SERPINB10	GAL1	ENSGALP00000020960	ENSGALP00000035925	Heterochromatin-associated protein MENT; DNA-binding protein that promotes DNA condensation into transcriptionally inactive heterochromatin in terminally differentiated avian blood cells. Promotes tight packing of nucleosomes into spherical clusters by binding to linker DNA and subsequent oligomerization. Acts as a cysteine protease inhibitor towards CTSL (cathepsin L1) and CTSV (cathepsin L2), b…	Gallinacin-1; Has bactericidal activity. Potent activity against E.coli ML-35, L.monocytogenes EGD and C.albicans	0.362
SERPINB10	GAL2	ENSGALP00000020960	ENSGALP00000030904	Heterochromatin-associated protein MENT; DNA-binding protein that promotes DNA condensation into transcriptionally inactive heterochromatin in terminally differentiated avian blood cells. Promotes tight packing of nucleosomes into spherical clusters by binding to linker DNA and subsequent oligomerization. Acts as a cysteine protease inhibitor towards CTSL (cathepsin L1) and CTSV (cathepsin L2), b…	Gallinacin-2; Potent antibacterial activity against the Gram-negative bacterium E.coli ML-35, and against the Gram-positive bacterium L.monocytogenes EGD. Lacks antifungal activity against C.albicans	0.465
SERPINB10	GAL6	ENSGALP00000020960	ENSGALP00000026847	Heterochromatin-associated protein MENT; DNA-binding protein that promotes DNA condensation into transcriptionally inactive heterochromatin in terminally differentiated avian blood cells. Promotes tight packing of nucleosomes into spherical clusters by binding to linker DNA and subsequent oligomerization. Acts as a cysteine protease inhibitor towards CTSL (cathepsin L1) and CTSV (cathepsin L2), b…	Gallinacin-6; Has bactericidal activity. Potent activity against S.typhimurium and S.entiriditis	0.465
SERPINB10	LECT2	ENSGALP00000020960	ENSGALP00000010210	Heterochromatin-associated protein MENT; DNA-binding protein that promotes DNA condensation into transcriptionally inactive heterochromatin in terminally differentiated avian blood cells. Promotes tight packing of nucleosomes into spherical clusters by binding to linker DNA and subsequent oligomerization. Acts as a cysteine protease inhibitor towards CTSL (cathepsin L1) and CTSV (cathepsin L2), b…	Myeloid protein 1; Gallus gallus leukocyte cell-derived chemotaxin 2 (LECT2), mRNA	0.362

## Sheet: Reactome immune-pathway
			up regulated																		down regulated
	Reactome Pathways	Total Genes	L DOH			CF DOH			C2 DOH			L 10D			CF 10D			C2 10D			L DOH			CF DOH			C2 DOH			L 10D			CF 10D			C2 10D
			N Genes*	P-value	FDR	N Genes	P-value	FDR	N Genes	P-value	FDR	N Genes	P-value	FDR	N Genes	P-value	FDR	N Genes	P-value	FDR	N Genes	P-value	FDR	N Genes	P-value	FDR	N Genes	P-value	FDR	N Genes	P-value	FDR	N Genes	P-value	FDR	N Genes	P-value	FDR
Adaptive immune	Class I MHC mediated antigen processing & presentation	465	2	0.66	0.659	1	0.886	0.886				1	0.62	0.62										2	0.749	0.749							2	0.25	0.25	2	0.28	0.28
	Costimulation by the CD28 family	97				1	0.36	0.36
	Lymphoid immunoregulatory interactions	316				1	0.77	0.77													1	0.691	0.691	1	0.839	0.839
	MHC class II antigen presentation	148				2	0.149	0.149	1	0.462	0.462	3	0.00341	0.0764	1	0.239	0.239	1	0.4	0.403	1	0.421	0.421	3	0.0535	0.11				1	0.778	0.778
	Rap1 signalling	24							1	0.0953	0.188				1	0.0432	0.0898	2	0.00321	0.0192	2	0.0036	0.0534	1	0.128	0.128
	Signaling by the B Cell Receptor (BCR)	190	2	0.23	0.232																									1	0.456	0.456	1	0.33	0.33	1	0.31	0.31
	TCR signaling	146	2	0.16	0.156																									1	0.373	0.373	1	0.26	0.26	1	0.28	0.28
	Butyrophilin (BTN) family interactions	12																												1	0.0374	0.223
Innate Immune	Antimicrobial peptides	123	3	0.0216	0.129				1	0.4	0.402																			2	0.0585	0.223				2	0.031	0.13
	C-type lectin receptors (CLRs)	202	2	0.253	0.253																									1	0.476	0.476	1	0.35	0.35	1	0.36	0.36
	Cytosolic sensors of pathogen-associated DNA	77	1	0.31	0.31
	Fc epsilon receptor (FCERI) signaling	234	2	0.31	0.31																									1	0.52	0.52	1	0.39	0.39	1	0.41	0.41
	Fcgamma receptor (FCGR) dependent phagocytosis	193	1	0.607	0.607																1	0.51	0.51	4	0.0251	0.1	4	0.000172	0.00721	2	0.12	0.23
	Neutrophil degranulation	480	9	0.000478	0.0335	4	0.179	0.179	8	0.000828	0.0223	1		0.632	1	0.59	0.59	4	0.0841	0.12	4	0.0995	0.127	4	0.29	0.29	2	0.158	0.158	5	0.0178	0.223	3	0.08	0.12	4	0.022	0.13
	Nucleotide-binding receptor (NLR) signaling pathways	69	1	0.283	0.283																						1	0.0975	0.0975
	ROS, RNS production in phagocytes	82																1	0.248	0.248				1	0.37	0.37
	Toll-Like Receptors Cascades	184	2	0.221	0.221	1	0.573	0.573	5	0.00101	0.0228	1		0.316				1	0.473	0.473				2	0.284	0.284							1	0.35	0.35
	DDX58/IF1H1-mediated induction of interferon-alpha/beta	96	1	0.37	0.37				1	0.33	0.33	1		0.179
	Advanced glycosylation endproduct receptor signaling								1	0.0646	0.18										1	0.057	0.127
* Number of proteins found in the dataset correspondent to specific pathway
LAB-probiotic (L), Citrobacter freundii (CF) or Citrobacter spp. (C2)
DOH: Day of hatch

## Sheet: GO L-up DOH
Gene Ontology Terms with upregulated proteins in L treatment at Day of hatch (DOH)
#term ID	term description	observed gene count	background gene count	false discovery rate	matching proteins in your network (labels)
GO:0009987	cellular process	41	1590	9.11e-30	ACO1,ACTN4,ALCAM,ALDOB,APOA1,ATP1A1,CAMK2D,CKMT1A,COL6A2,COPS3,DDOST,DES,EEF1A1,EMC1,ENO1,GAPDH,GLUD1,GNAI2,GNB2L1,GSN,HIST1H46,HSP90B1,HSPB1,LYZ,MAGT1,MDH1,PGP,PHB2,PPIB,PRDX1,PRKAR1A,PSMA7,RAB2A,RARS,RPL22,RPS27A,SOD1,STMN1,TPM1,TTR,YARS
GO:0008152	metabolic process	30	1070	5.69e-20	ACO1,AKR1A1,ALDOB,APOA1,CAMK2D,CKMT1A,COPS3,CYB5A,DDOST,EEF1A1,ENO1,GAPDH,GLUD1,GNB2L1,HIST1H46,LYZ,MAGT1,MDH1,PGP,PHB2,PPIB,PRDX1,PRSS2,PSMA7,RARS,RPL22,RPS27A,SOD1,TTR,YARS
GO:0044237	cellular metabolic process	27	988	3.11e-17	ACO1,ALDOB,APOA1,CAMK2D,CKMT1A,COPS3,DDOST,EEF1A1,ENO1,GAPDH,GLUD1,GNB2L1,HIST1H46,LYZ,MAGT1,MDH1,PGP,PHB2,PPIB,PRDX1,PSMA7,RARS,RPL22,RPS27A,SOD1,TTR,YARS
GO:1901564	organonitrogen compound metabolic process	21	534	1.12e-15	ALDOB,APOA1,CAMK2D,COPS3,DDOST,EEF1A1,ENO1,GAPDH,GLUD1,GNB2L1,LYZ,MAGT1,MDH1,PGP,PPIB,PRSS2,PSMA7,RARS,RPL22,RPS27A,YARS
GO:0044238	primary metabolic process	25	971	3.3e-15	ACO1,ALDOB,APOA1,CAMK2D,COPS3,DDOST,EEF1A1,ENO1,GAPDH,GLUD1,GNB2L1,HIST1H46,LYZ,MAGT1,MDH1,PGP,PHB2,PPIB,PRSS2,PSMA7,RARS,RPL22,RPS27A,TTR,YARS
GO:0071704	organic substance metabolic process	25	1008	6.52e-15	ACO1,ALDOB,APOA1,CAMK2D,COPS3,DDOST,EEF1A1,ENO1,GAPDH,GLUD1,GNB2L1,HIST1H46,LYZ,MAGT1,MDH1,PGP,PHB2,PPIB,PRSS2,PSMA7,RARS,RPL22,RPS27A,TTR,YARS
GO:0006807	nitrogen compound metabolic process	23	930	1.89e-13	ALDOB,APOA1,CAMK2D,COPS3,DDOST,EEF1A1,ENO1,GAPDH,GLUD1,GNB2L1,HIST1H46,LYZ,MAGT1,MDH1,PGP,PHB2,PPIB,PRSS2,PSMA7,RARS,RPL22,RPS27A,YARS
GO:0019538	protein metabolic process	16	412	1.58e-11	APOA1,CAMK2D,COPS3,DDOST,EEF1A1,GAPDH,GNB2L1,MAGT1,PGP,PPIB,PRSS2,PSMA7,RARS,RPL22,RPS27A,YARS
GO:0043170	macromolecule metabolic process	19	825	3.51e-10	APOA1,CAMK2D,COPS3,DDOST,EEF1A1,GAPDH,GNB2L1,HIST1H46,LYZ,MAGT1,PGP,PHB2,PPIB,PRSS2,PSMA7,RARS,RPL22,RPS27A,YARS
GO:0044267	cellular protein metabolic process	14	366	7.02e-10	CAMK2D,COPS3,DDOST,EEF1A1,GAPDH,GNB2L1,MAGT1,PGP,PPIB,PSMA7,RARS,RPL22,RPS27A,YARS
GO:0044281	small molecule metabolic process	11	168	7.02e-10	ACO1,ALDOB,APOA1,ENO1,GAPDH,GLUD1,MDH1,PGP,RARS,TTR,YARS
GO:1901566	organonitrogen compound biosynthetic process	11	177	1.04e-09	ALDOB,DDOST,EEF1A1,ENO1,GAPDH,GNB2L1,MAGT1,RARS,RPL22,RPS27A,YARS
GO:0044260	cellular macromolecule metabolic process	17	721	3.33e-09	CAMK2D,COPS3,DDOST,EEF1A1,GAPDH,GNB2L1,HIST1H46,LYZ,MAGT1,PGP,PHB2,PPIB,PSMA7,RARS,RPL22,RPS27A,YARS
GO:0055114	oxidation-reduction process	9	102	4.25e-09	ACO1,AKR1A1,ALDOB,CYB5A,GAPDH,GLUD1,MDH1,PRDX1,SOD1
GO:1901576	organic substance biosynthetic process	15	556	8.68e-09	ALDOB,APOA1,DDOST,EEF1A1,ENO1,GAPDH,GNB2L1,HIST1H46,MAGT1,PGP,PHB2,RARS,RPL22,RPS27A,YARS
GO:0019752	carboxylic acid metabolic process	8	79	1.61e-08	ACO1,ALDOB,ENO1,GAPDH,GLUD1,MDH1,RARS,YARS
GO:0050896	response to stimulus	16	718	2.12e-08	ACO1,ACTN4,ALCAM,APOA1,CAMK2D,EEF1A1,GAPDH,GNAI2,GNB2L1,HSP90B1,HSPB1,LYZ,PRDX1,RPS27A,SOD1,TTR
GO:0016043	cellular component organization	14	526	3.49e-08	ALCAM,ALDOB,APOA1,COL6A2,DES,GAPDH,GSN,HIST1H46,HSPB1,PRKAR1A,RAB2A,STMN1,TPM1,TTR
GO:0044249	cellular biosynthetic process	14	548	5.47e-08	ALDOB,DDOST,EEF1A1,ENO1,GAPDH,GNB2L1,HIST1H46,MAGT1,PGP,PHB2,RARS,RPL22,RPS27A,YARS
GO:0065007	biological regulation	19	1189	6.27e-08	ACO1,ACTN4,ALDOB,APOA1,CAMK2D,GAPDH,GNAI2,GNB2L1,GPC1,GSN,HIST1H46,HSP90B1,HSPB1,PGP,PHB2,PRDX1,PRKAR1A,STMN1,TTR
GO:0005975	carbohydrate metabolic process	6	44	4.34e-07	ALDOB,ENO1,GAPDH,LYZ,MDH1,PGP
GO:0044248	cellular catabolic process	8	131	4.5e-07	ALDOB,APOA1,COPS3,ENO1,GAPDH,LYZ,PRDX1,PSMA7
GO:0006412	translation	6	52	9.67e-07	EEF1A1,GNB2L1,RARS,RPL22,RPS27A,YARS
GO:0050794	regulation of cellular process	16	1051	2.95e-06	ACTN4,APOA1,CAMK2D,GAPDH,GNAI2,GNB2L1,GPC1,GSN,HIST1H46,HSPB1,PGP,PHB2,PRDX1,PRKAR1A,STMN1,TTR
GO:0006518	peptide metabolic process	6	65	3e-06	EEF1A1,GNB2L1,RARS,RPL22,RPS27A,YARS
GO:0044271	cellular nitrogen compound biosynthetic process	11	431	3.05e-06	ALDOB,EEF1A1,ENO1,GAPDH,GNB2L1,HIST1H46,PHB2,RARS,RPL22,RPS27A,YARS
GO:0017144	drug metabolic process	6	68	3.51e-06	ACO1,ALDOB,ENO1,GAPDH,MDH1,PRDX1
GO:0006091	generation of precursor metabolites and energy	5	34	4.06e-06	ACO1,ALDOB,ENO1,GAPDH,MDH1
GO:1901575	organic substance catabolic process	7	121	4.13e-06	ALDOB,APOA1,COPS3,ENO1,GAPDH,LYZ,PSMA7
GO:0046496	nicotinamide nucleotide metabolic process	4	15	8.88e-06	ALDOB,ENO1,GAPDH,MDH1
GO:0016052	carbohydrate catabolic process	4	16	1.03e-05	ALDOB,ENO1,GAPDH,LYZ
GO:0051186	cofactor metabolic process	5	44	1.07e-05	ALDOB,ENO1,GAPDH,MDH1,PRDX1
GO:0006796	phosphate-containing compound metabolic process	8	218	1.15e-05	ALDOB,APOA1,CAMK2D,CKMT1A,ENO1,GAPDH,MDH1,PGP
GO:0034641	cellular nitrogen compound metabolic process	12	630	1.16e-05	ALDOB,EEF1A1,ENO1,GAPDH,GNB2L1,HIST1H46,MDH1,PHB2,RARS,RPL22,RPS27A,YARS
GO:0019637	organophosphate metabolic process	6	94	1.5e-05	ALDOB,APOA1,ENO1,GAPDH,MDH1,PGP
GO:0022607	cellular component assembly	8	234	1.73e-05	ALDOB,APOA1,COL6A2,DES,GSN,HIST1H46,PRKAR1A,TTR
GO:0065008	regulation of biological quality	9	330	2.02e-05	ACO1,APOA1,GAPDH,GNB2L1,GSN,HSP90B1,HSPB1,PRDX1,TTR
GO:0034645	cellular macromolecule biosynthetic process	10	438	2.23e-05	DDOST,EEF1A1,GNB2L1,HIST1H46,MAGT1,PHB2,RARS,RPL22,RPS27A,YARS
GO:0043933	protein-containing complex subunit organization	7	171	2.63e-05	ALDOB,APOA1,COL6A2,DES,HIST1H46,STMN1,TTR
GO:0006457	protein folding	4	23	2.85e-05	EMC1,HSP90B1,HSPB1,PPIB
GO:0016051	carbohydrate biosynthetic process	4	23	2.85e-05	ALDOB,ENO1,GAPDH,PGP
GO:1901135	carbohydrate derivative metabolic process	6	109	2.94e-05	ALDOB,DDOST,ENO1,GAPDH,LYZ,MAGT1
GO:0097435	supramolecular fiber organization	5	60	3.31e-05	DES,GSN,PRKAR1A,STMN1,TPM1
GO:0044283	small molecule biosynthetic process	5	62	3.78e-05	ALDOB,APOA1,ENO1,GAPDH,PGP
GO:0007010	cytoskeleton organization	6	117	4.06e-05	DES,GAPDH,GSN,PRKAR1A,STMN1,TPM1
GO:0072350	tricarboxylic acid metabolic process	3	7	5.96e-05	ACO1,GLUD1,MDH1
GO:0006464	cellular protein modification process	8	297	7.55e-05	CAMK2D,COPS3,DDOST,GAPDH,GNB2L1,MAGT1,PGP,PPIB
GO:0006950	response to stress	8	302	8.25e-05	APOA1,GAPDH,HSP90B1,HSPB1,LYZ,PRDX1,RPS27A,SOD1
GO:1901137	carbohydrate derivative biosynthetic process	5	77	9.23e-05	ALDOB,DDOST,ENO1,GAPDH,MAGT1
GO:0048523	negative regulation of cellular process	9	414	9.29e-05	APOA1,GAPDH,GNB2L1,GPC1,GSN,HIST1H46,HSPB1,PGP,PRKAR1A
GO:0001906	cell killing	3	10	0.00013	GAPDH,LYZ,PRDX1
GO:0006096	glycolytic process	3	10	0.00013	ALDOB,ENO1,GAPDH
GO:0006757	ATP generation from ADP	3	10	0.00013	ALDOB,ENO1,GAPDH
GO:0042866	pyruvate biosynthetic process	3	10	0.00013	ALDOB,ENO1,GAPDH
GO:0051716	cellular response to stimulus	10	560	0.00013	ACTN4,APOA1,CAMK2D,EEF1A1,GAPDH,GNAI2,GNB2L1,PRDX1,RPS27A,SOD1
GO:0065003	protein-containing complex assembly	6	148	0.00013	ALDOB,APOA1,COL6A2,DES,HIST1H46,TTR
GO:0019359	nicotinamide nucleotide biosynthetic process	3	11	0.00015	ALDOB,ENO1,GAPDH
GO:0006996	organelle organization	8	345	0.00017	DES,GAPDH,GSN,HIST1H46,PRKAR1A,RAB2A,STMN1,TPM1
GO:0016999	antibiotic metabolic process	3	12	0.00017	ACO1,MDH1,PRDX1
GO:1901360	organic cyclic compound metabolic process	10	594	0.00019	ALDOB,APOA1,ENO1,GAPDH,HIST1H46,MDH1,PHB2,RARS,RPS27A,YARS
GO:0009166	nucleotide catabolic process	3	13	0.0002	ALDOB,ENO1,GAPDH
GO:0006090	pyruvate metabolic process	3	14	0.00024	ALDOB,ENO1,GAPDH
GO:0006094	gluconeogenesis	3	14	0.00024	ALDOB,ENO1,GAPDH
GO:0006006	glucose metabolic process	3	16	0.00031	ALDOB,ENO1,GAPDH
GO:0006754	ATP biosynthetic process	3	16	0.00031	ALDOB,ENO1,GAPDH
GO:0018193	peptidyl-amino acid modification	5	111	0.00034	CAMK2D,DDOST,GAPDH,MAGT1,PPIB
GO:0065009	regulation of molecular function	7	306	0.00053	ALDOB,APOA1,GAPDH,GNB2L1,HSPB1,PRKAR1A,TTR
GO:0006139	nucleobase-containing compound metabolic process	9	553	0.00054	ALDOB,ENO1,GAPDH,HIST1H46,MDH1,PHB2,RARS,RPS27A,YARS
GO:0019725	cellular homeostasis	4	62	0.00054	ACO1,GNB2L1,HSP90B1,PRDX1
GO:0042592	homeostatic process	5	125	0.00054	ACO1,APOA1,GNB2L1,HSP90B1,PRDX1
GO:0050790	regulation of catalytic activity	6	208	0.00054	ALDOB,APOA1,GAPDH,GNB2L1,HSPB1,PRKAR1A
GO:0019430	removal of superoxide radicals	2	2	0.00056	PRDX1,SOD1
GO:0006469	negative regulation of protein kinase activity	3	22	0.00059	GNB2L1,HSPB1,PRKAR1A
GO:0010467	gene expression	8	440	0.00063	EEF1A1,GNB2L1,HIST1H46,PHB2,RARS,RPL22,RPS27A,YARS
GO:0016310	phosphorylation	5	136	0.00067	ALDOB,CAMK2D,CKMT1A,ENO1,GAPDH
GO:0043086	negative regulation of catalytic activity	4	69	0.00068	GAPDH,GNB2L1,HSPB1,PRKAR1A
GO:0042221	response to chemical	7	331	0.0007	ACO1,ALCAM,EEF1A1,GAPDH,GNB2L1,PRDX1,SOD1
GO:0009168	purine ribonucleoside monophosphate biosynthetic process	3	25	0.00075	ALDOB,ENO1,GAPDH
GO:0048878	chemical homeostasis	4	72	0.00076	ACO1,APOA1,GNB2L1,HSP90B1
GO:1903202	negative regulation of oxidative stress-induced cell death	2	3	0.00077	GNB2L1,HSPB1
GO:0010035	response to inorganic substance	3	27	0.00087	ACO1,PRDX1,SOD1
GO:0051239	regulation of multicellular organismal process	6	244	0.00096	APOA1,GAPDH,GNB2L1,GPC1,HIST1H46,HSPB1
GO:0080090	regulation of primary metabolic process	9	634	0.0011	ACTN4,APOA1,GAPDH,GNB2L1,HSPB1,PGP,PHB2,PRDX1,PRKAR1A
GO:0031323	regulation of cellular metabolic process	9	645	0.0012	ACTN4,APOA1,GAPDH,GNB2L1,HSPB1,PGP,PHB2,PRDX1,PRKAR1A
GO:0032501	multicellular organismal process	9	644	0.0012	ALCAM,ALDOB,APOA1,CAMK2D,PRKAR1A,PRSS2,STMN1,TPM1,TTR
GO:0006066	alcohol metabolic process	3	32	0.0013	APOA1,PGP,TTR
GO:0006520	cellular amino acid metabolic process	3	33	0.0013	GLUD1,RARS,YARS
GO:0006099	tricarboxylic acid cycle	2	5	0.0014	ACO1,MDH1
GO:0006101	citrate metabolic process	2	5	0.0014	ACO1,MDH1
GO:0006734	NADH metabolic process	2	5	0.0014	ALDOB,MDH1
GO:0032269	negative regulation of cellular protein metabolic process	4	89	0.0014	GAPDH,GNB2L1,HSPB1,PRKAR1A
GO:0051016	barbed-end actin filament capping	2	5	0.0014	GSN,HSPB1
GO:0048468	cell development	5	175	0.0016	ALCAM,APOA1,PRKAR1A,STMN1,TTR
GO:0051259	protein complex oligomerization	3	36	0.0016	COL6A2,HIST1H46,TTR
GO:0006414	translational elongation	2	6	0.0017	EEF1A1,GNB2L1
GO:0006418	tRNA aminoacylation for protein translation	2	6	0.0017	RARS,YARS
GO:0120036	plasma membrane bounded cell projection organization	4	99	0.0018	ALCAM,APOA1,GSN,STMN1
GO:0006879	cellular iron ion homeostasis	2	7	0.0019	ACO1,HSP90B1
GO:0009167	purine ribonucleoside monophosphate metabolic process	3	41	0.0019	ALDOB,ENO1,GAPDH
GO:0018279	protein N-linked glycosylation via asparagine	2	7	0.0019	DDOST,MAGT1
GO:0031640	killing of cells of other organism	2	7	0.0019	GAPDH,LYZ
GO:0048589	developmental growth	3	40	0.0019	ALCAM,PRKAR1A,TTR
GO:0051179	localization	7	423	0.002	ACTN4,APOA1,ATP1A1,HSP90B1,RAB2A,TST,TTR
GO:0043254	regulation of protein complex assembly	3	44	0.0023	GNB2L1,GSN,HSPB1
GO:0048522	positive regulation of cellular process	7	434	0.0023	ACTN4,APOA1,GAPDH,GNB2L1,GPC1,GSN,HSPB1
GO:0061077	chaperone-mediated protein folding	2	8	0.0023	HSPB1,PPIB
GO:0071901	negative regulation of protein serine/threonine kinase activity	2	8	0.0023	HSPB1,PRKAR1A
GO:0055082	cellular chemical homeostasis	3	46	0.0025	ACO1,GNB2L1,HSP90B1
GO:0051129	negative regulation of cellular component organization	3	47	0.0026	GNB2L1,GSN,HSPB1
GO:0051291	protein heterooligomerization	2	9	0.0026	COL6A2,HIST1H46
GO:0051336	regulation of hydrolase activity	4	115	0.0026	ALDOB,APOA1,GAPDH,GNB2L1
GO:0006810	transport	6	331	0.003	ACTN4,APOA1,ATP1A1,RAB2A,TST,TTR
GO:0046165	alcohol biosynthetic process	2	10	0.003	APOA1,PGP
GO:0070887	cellular response to chemical stimulus	5	216	0.003	EEF1A1,GAPDH,GNB2L1,PRDX1,SOD1
GO:0080135	regulation of cellular response to stress	3	50	0.003	GNB2L1,HSPB1,PRDX1
GO:2001242	regulation of intrinsic apoptotic signaling pathway	2	10	0.003	GNB2L1,HSPB1
GO:0031324	negative regulation of cellular metabolic process	5	220	0.0032	GAPDH,GNB2L1,HSPB1,PGP,PRKAR1A
GO:0051493	regulation of cytoskeleton organization	3	54	0.0034	GSN,HSPB1,STMN1
GO:0050801	ion homeostasis	3	55	0.0036	ACO1,GNB2L1,HSP90B1
GO:0001932	regulation of protein phosphorylation	4	130	0.0037	GNB2L1,HSPB1,PRDX1,PRKAR1A
GO:0031326	regulation of cellular biosynthetic process	7	486	0.0037	ACTN4,APOA1,GAPDH,GNB2L1,HSPB1,PGP,PHB2
GO:0030036	actin cytoskeleton organization	3	58	0.004	GSN,PRKAR1A,TPM1
GO:0051345	positive regulation of hydrolase activity	3	58	0.004	ALDOB,APOA1,GNB2L1
GO:0032268	regulation of cellular protein metabolic process	5	241	0.0043	GAPDH,GNB2L1,HSPB1,PRDX1,PRKAR1A
GO:0048588	developmental cell growth	2	13	0.0043	ALCAM,TTR
GO:0044255	cellular lipid metabolic process	3	61	0.0045	APOA1,PGP,TTR
GO:0051262	protein tetramerization	2	14	0.0047	HIST1H46,TTR
GO:0030154	cell differentiation	6	376	0.005	ALCAM,APOA1,CAMK2D,PRKAR1A,STMN1,TTR
GO:0044265	cellular macromolecule catabolic process	3	64	0.005	COPS3,LYZ,PSMA7
GO:0051240	positive regulation of multicellular organismal process	4	146	0.0051	GAPDH,GNB2L1,GPC1,HSPB1
GO:1901362	organic cyclic compound biosynthetic process	6	385	0.0054	ALDOB,APOA1,ENO1,GAPDH,HIST1H46,PHB2
GO:1901701	cellular response to oxygen-containing compound	3	68	0.0057	GNB2L1,PRDX1,SOD1
GO:0045596	negative regulation of cell differentiation	3	69	0.0059	APOA1,GPC1,HIST1H46
GO:0009605	response to external stimulus	4	154	0.006	ALCAM,GAPDH,LYZ,TTR
GO:0009966	regulation of signal transduction	5	265	0.006	GNB2L1,GPC1,HSPB1,PRDX1,TTR
GO:1901565	organonitrogen compound catabolic process	3	70	0.0061	COPS3,LYZ,PSMA7
GO:0033554	cellular response to stress	4	161	0.0068	APOA1,PRDX1,RPS27A,SOD1
GO:0051707	response to other organism	3	74	0.0068	GAPDH,LYZ,TTR
GO:0048731	system development	6	412	0.007	ALCAM,ALDOB,APOA1,CAMK2D,PRKAR1A,STMN1
GO:0071702	organic substance transport	4	165	0.0071	ACTN4,APOA1,RAB2A,TST
GO:0031175	neuron projection development	3	76	0.0072	ALCAM,APOA1,STMN1
GO:0048856	anatomical structure development	7	565	0.0072	ALCAM,ALDOB,APOA1,CAMK2D,PRKAR1A,STMN1,TTR
GO:0006508	proteolysis	3	82	0.0086	COPS3,PRSS2,PSMA7
GO:0006650	glycerophospholipid metabolic process	2	22	0.009	APOA1,PGP
GO:0031334	positive regulation of protein complex assembly	2	22	0.009	GNB2L1,GSN
GO:0033036	macromolecule localization	4	181	0.0094	ACTN4,APOA1,RAB2A,TST
GO:0031331	positive regulation of cellular catabolic process	2	23	0.0096	APOA1,GNB2L1
GO:2000026	regulation of multicellular organismal development	4	183	0.0096	APOA1,GNB2L1,GPC1,HIST1H46
GO:0060548	negative regulation of cell death	3	87	0.0097	GAPDH,GNB2L1,HSPB1
GO:0006955	immune response	3	90	0.0105	ALCAM,GAPDH,PRDX1
GO:0051222	positive regulation of protein transport	2	25	0.0109	GAPDH,GNB2L1
GO:0051171	regulation of nitrogen compound metabolic process	7	625	0.0113	ACTN4,GAPDH,GNB2L1,HSPB1,PHB2,PRDX1,PRKAR1A
GO:0051241	negative regulation of multicellular organismal process	3	94	0.0115	APOA1,GPC1,HIST1H46
GO:0001819	positive regulation of cytokine production	2	27	0.0121	GAPDH,HSPB1
GO:0062012	regulation of small molecule metabolic process	2	27	0.0121	APOA1,PGP
GO:0060255	regulation of macromolecule metabolic process	7	645	0.0129	ACTN4,GAPDH,GNB2L1,HSPB1,PHB2,PRDX1,PRKAR1A
GO:0006952	defense response	3	103	0.0142	GAPDH,LYZ,PRDX1
GO:0007015	actin filament organization	2	30	0.0142	GSN,TPM1
GO:0002683	negative regulation of immune system process	2	31	0.0151	HIST1H46,PRKAR1A
GO:0006511	ubiquitin-dependent protein catabolic process	2	32	0.0159	COPS3,PSMA7
GO:0051128	regulation of cellular component organization	4	219	0.0162	GNB2L1,GSN,HSPB1,STMN1
GO:0034622	cellular protein-containing complex assembly	3	110	0.0166	ALDOB,DES,HIST1H46
GO:0034654	nucleobase-containing compound biosynthetic process	5	357	0.0167	ALDOB,ENO1,GAPDH,HIST1H46,PHB2
GO:0007399	nervous system development	4	225	0.0176	ALCAM,APOA1,CAMK2D,STMN1
GO:0000226	microtubule cytoskeleton organization	2	35	0.0183	GAPDH,STMN1
GO:1902532	negative regulation of intracellular signal transduction	2	36	0.019	GNB2L1,HSPB1
GO:0052548	regulation of endopeptidase activity	2	37	0.0197	GAPDH,GNB2L1
GO:0051049	regulation of transport	3	120	0.02	APOA1,GAPDH,GNB2L1
GO:0006417	regulation of translation	2	38	0.0205	GAPDH,GNB2L1
GO:0009100	glycoprotein metabolic process	2	38	0.0205	DDOST,MAGT1
GO:0043065	positive regulation of apoptotic process	2	39	0.0213	GAPDH,GNB2L1
GO:0042981	regulation of apoptotic process	3	129	0.0232	GAPDH,GNB2L1,HSPB1
GO:0071705	nitrogen compound transport	3	136	0.0261	ACTN4,RAB2A,TST
GO:1902531	regulation of intracellular signal transduction	3	143	0.0294	GNB2L1,HSPB1,PRDX1
GO:0061061	muscle structure development	2	50	0.031	APOA1,PRKAR1A
GO:0031325	positive regulation of cellular metabolic process	4	281	0.0324	ACTN4,APOA1,GNB2L1,HSPB1
GO:0045087	innate immune response	2	52	0.0331	GAPDH,PRDX1
GO:0098542	defense response to other organism	2	54	0.0354	GAPDH,LYZ
GO:0071363	cellular response to growth factor stimulus	2	57	0.039	EEF1A1,GNB2L1
GO:0008283	cell population proliferation	2	58	0.0401	PRDX1,PRKAR1A
GO:0010556	regulation of macromolecule biosynthetic process	5	470	0.0423	ACTN4,GAPDH,GNB2L1,HSPB1,PHB2
GO:0008285	negative regulation of cell population proliferation	2	62	0.0443	GPC1,PRKAR1A
GO:0090304	nucleic acid metabolic process	5	486	0.0478	HIST1H46,PHB2,RARS,RPS27A,YARS

## Sheet: Go L-down DOH
Gene Ontology Terms with downregulated proteins in L treatment at Day of hatch (DOH)
term ID	term description	observed gene count	background gene count	false discovery rate	matching proteins in your network (IDs)	matching proteins in your network (labels)
GO:0006807	nitrogen compound metabolic process	26	930	0	ENSGALP00000000643,ENSGALP00000001957,ENSGALP00000003130,ENSGALP00000004840,ENSGALP00000005212,ENSGALP00000013294,ENSGALP00000014747,ENSGALP00000017462,ENSGALP00000026345,ENSGALP00000026509,ENSGALP00000037222,ENSGALP00000038179,ENSGALP00000038957,ENSGALP00000039133	ACP1,DDX1,EIF4A3,HDAC1,HMGB2,HMGB3,HNRNPDL,NT5C2,RPA1,RPL27,RPL36,SMU1,SRRM1,YWHAE
GO:0009987	cellular process	47	1590	0	ENSGALP00000000643,ENSGALP00000001957,ENSGALP00000003130,ENSGALP00000004265,ENSGALP00000004840,ENSGALP00000005212,ENSGALP00000008131,ENSGALP00000010754,ENSGALP00000011559,ENSGALP00000012367,ENSGALP00000013294,ENSGALP00000014747,ENSGALP00000015277,ENSGALP00000015287,ENSGALP00000016120,ENSGALP00000017462,ENSGALP00000019399,ENSGALP00000025461,ENSGALP00000025525,ENSGALP00000026345,ENSGALP00000026509,…	ACP1,CA2,CAPZA2,CAV1,CCT8,DDX1,DPYSL2,EIF4A3,HDAC1,HMGB2,HMGB3,HNRNPDL,ITGB1,LDHB,MAPRE1,MYO1C,NT5C2,RAP1B,RPA1,RPL27,RPL36,SLC9A3R1,SMU1,SRRM1,TAGLN,TPT1,VCL,YWHAE
GO:0044237	cellular metabolic process	28	988	0	ENSGALP00000000643,ENSGALP00000001957,ENSGALP00000003130,ENSGALP00000004840,ENSGALP00000005212,ENSGALP00000013294,ENSGALP00000014747,ENSGALP00000017462,ENSGALP00000026345,ENSGALP00000026509,ENSGALP00000037222,ENSGALP00000038179,ENSGALP00000038957,ENSGALP00000039133,ENSGALP00000041792	ACP1,DDX1,EIF4A3,HDAC1,HMGB2,HMGB3,HNRNPDL,LDHB,NT5C2,RPA1,RPL27,RPL36,SMU1,SRRM1,YWHAE
GO:0044238	primary metabolic process	29	971	0	ENSGALP00000000643,ENSGALP00000001957,ENSGALP00000003130,ENSGALP00000004840,ENSGALP00000005212,ENSGALP00000013294,ENSGALP00000014747,ENSGALP00000017462,ENSGALP00000026345,ENSGALP00000026509,ENSGALP00000037222,ENSGALP00000038179,ENSGALP00000038957,ENSGALP00000039133,ENSGALP00000041792	ACP1,DDX1,EIF4A3,HDAC1,HMGB2,HMGB3,HNRNPDL,LDHB,NT5C2,RPA1,RPL27,RPL36,SMU1,SRRM1,YWHAE
GO:0065007	biological regulation	39	1189	1.01e-39	ENSGALP00000003130,ENSGALP00000004840,ENSGALP00000005212,ENSGALP00000006240,ENSGALP00000008131,ENSGALP00000010754,ENSGALP00000011559,ENSGALP00000012367,ENSGALP00000014747,ENSGALP00000015277,ENSGALP00000015287,ENSGALP00000016120,ENSGALP00000017462,ENSGALP00000021314,ENSGALP00000026509,ENSGALP00000030864,ENSGALP00000036341,ENSGALP00000037222,ENSGALP00000038179,ENSGALP00000039133,ENSGALP00000042618	BASP1,CALD1,CAPZA2,CAV1,COL6A3,DDX1,DPYSL2,EIF4A3,HDAC1,HMGB2,HMGB3,HNRNPDL,ITGB1,MAPRE1,RAP1B,RPA1,SLC9A3R1,SMU1,TPT1,VCL,YWHAE
GO:0050789	regulation of biological process	36	1114	3.11e-34	ENSGALP00000003130,ENSGALP00000005212,ENSGALP00000006240,ENSGALP00000008131,ENSGALP00000010754,ENSGALP00000011559,ENSGALP00000012367,ENSGALP00000014747,ENSGALP00000015277,ENSGALP00000015287,ENSGALP00000016120,ENSGALP00000017462,ENSGALP00000026509,ENSGALP00000030864,ENSGALP00000036341,ENSGALP00000037222,ENSGALP00000038179,ENSGALP00000039133,ENSGALP00000042618	BASP1,CAPZA2,CAV1,COL6A3,DDX1,DPYSL2,EIF4A3,HDAC1,HMGB2,HMGB3,HNRNPDL,ITGB1,MAPRE1,RAP1B,SLC9A3R1,SMU1,TPT1,VCL,YWHAE
GO:0050794	regulation of cellular process	35	1051	3.31e-33	ENSGALP00000003130,ENSGALP00000005212,ENSGALP00000006240,ENSGALP00000008131,ENSGALP00000010754,ENSGALP00000011559,ENSGALP00000012367,ENSGALP00000014747,ENSGALP00000015277,ENSGALP00000015287,ENSGALP00000016120,ENSGALP00000017462,ENSGALP00000026509,ENSGALP00000030864,ENSGALP00000036341,ENSGALP00000037222,ENSGALP00000038179,ENSGALP00000039133	BASP1,CAPZA2,CAV1,COL6A3,DDX1,DPYSL2,EIF4A3,HDAC1,HMGB2,HMGB3,HNRNPDL,ITGB1,MAPRE1,RAP1B,SLC9A3R1,SMU1,VCL,YWHAE
GO:0007154	cell communication	19	425	2.24e-28	ENSGALP00000011559,ENSGALP00000012367,ENSGALP00000016120,ENSGALP00000039133	ITGB1,RAP1B,SLC9A3R1,YWHAE
GO:0008152	metabolic process	32	1070	1.25e-27	ENSGALP00000000643,ENSGALP00000001957,ENSGALP00000002822,ENSGALP00000003130,ENSGALP00000004840,ENSGALP00000005212,ENSGALP00000013294,ENSGALP00000014075,ENSGALP00000014747,ENSGALP00000017462,ENSGALP00000019979,ENSGALP00000026345,ENSGALP00000026509,ENSGALP00000037222,ENSGALP00000038179,ENSGALP00000038957,ENSGALP00000039133,ENSGALP00000041792	ACP1,ADH1C,C3H20ORF3,DDX1,EIF4A3,GLYR1,HDAC1,HMGB2,HMGB3,HNRNPDL,LDHB,NT5C2,RPA1,RPL27,RPL36,SMU1,SRRM1,YWHAE
GO:0044260	cellular macromolecule metabolic process	20	721	6.65e-27	ENSGALP00000000643,ENSGALP00000004840,ENSGALP00000005212,ENSGALP00000014747,ENSGALP00000017462,ENSGALP00000026345,ENSGALP00000026509,ENSGALP00000037222,ENSGALP00000038179,ENSGALP00000038957,ENSGALP00000039133	ACP1,DDX1,EIF4A3,HDAC1,HMGB2,HMGB3,HNRNPDL,RPA1,RPL27,RPL36,YWHAE
GO:0007165	signal transduction	18	391	1.55e-26	ENSGALP00000011559,ENSGALP00000012367,ENSGALP00000016120,ENSGALP00000039133	ITGB1,RAP1B,SLC9A3R1,YWHAE
GO:0050896	response to stimulus	28	718	4.58e-26	ENSGALP00000004840,ENSGALP00000011559,ENSGALP00000012367,ENSGALP00000014747,ENSGALP00000016120,ENSGALP00000017462,ENSGALP00000025525,ENSGALP00000026509,ENSGALP00000027976,ENSGALP00000030864,ENSGALP00000039133	CA2,DDX1,DPYSL2,HBE,HMGB2,HMGB3,ITGB1,RAP1B,RPA1,SLC9A3R1,YWHAE
GO:0006950	response to stress	17	302	5.17e-26	ENSGALP00000004840,ENSGALP00000014747,ENSGALP00000017462,ENSGALP00000026509,ENSGALP00000039133	DDX1,HMGB2,HMGB3,RPA1,YWHAE
GO:0006810	transport	17	331	2.18e-25	ENSGALP00000012367,ENSGALP00000027976,ENSGALP00000038179,ENSGALP00000039133,ENSGALP00000040865	EIF4A3,HBE,LRP1,SLC9A3R1,YWHAE
GO:0071704	organic substance metabolic process	29	1008	9.78e-24	ENSGALP00000000643,ENSGALP00000001957,ENSGALP00000003130,ENSGALP00000004840,ENSGALP00000005212,ENSGALP00000013294,ENSGALP00000014747,ENSGALP00000017462,ENSGALP00000026345,ENSGALP00000026509,ENSGALP00000037222,ENSGALP00000038179,ENSGALP00000038957,ENSGALP00000039133,ENSGALP00000041792	ACP1,DDX1,EIF4A3,HDAC1,HMGB2,HMGB3,HNRNPDL,LDHB,NT5C2,RPA1,RPL27,RPL36,SMU1,SRRM1,YWHAE
GO:0080090	regulation of primary metabolic process	25	634	1e-22	ENSGALP00000003130,ENSGALP00000005212,ENSGALP00000006240,ENSGALP00000012367,ENSGALP00000014747,ENSGALP00000016120,ENSGALP00000017462,ENSGALP00000026509,ENSGALP00000036341,ENSGALP00000037222,ENSGALP00000038179,ENSGALP00000039133	BASP1,COL6A3,DDX1,EIF4A3,HDAC1,HMGB2,HMGB3,HNRNPDL,RAP1B,SLC9A3R1,SMU1,YWHAE
GO:0051171	regulation of nitrogen compound metabolic process	24	625	2.28e-21	ENSGALP00000003130,ENSGALP00000005212,ENSGALP00000006240,ENSGALP00000012367,ENSGALP00000014747,ENSGALP00000016120,ENSGALP00000017462,ENSGALP00000026509,ENSGALP00000036341,ENSGALP00000037222,ENSGALP00000038179,ENSGALP00000039133	BASP1,COL6A3,DDX1,EIF4A3,HDAC1,HMGB2,HMGB3,HNRNPDL,RAP1B,SLC9A3R1,SMU1,YWHAE
GO:0071840	cellular component organization or biogenesis	23	547	3.78e-21	ENSGALP00000004840,ENSGALP00000005212,ENSGALP00000008131,ENSGALP00000014747,ENSGALP00000015277,ENSGALP00000015287,ENSGALP00000017462,ENSGALP00000026509,ENSGALP00000030864,ENSGALP00000038957	CAPZA2,CAV1,DDX1,DPYSL2,HDAC1,HMGB2,HMGB3,RPA1,RPL27,VCL
GO:0031323	regulation of cellular metabolic process	24	645	4.21e-21	ENSGALP00000003130,ENSGALP00000005212,ENSGALP00000006240,ENSGALP00000012367,ENSGALP00000014747,ENSGALP00000016120,ENSGALP00000017462,ENSGALP00000026509,ENSGALP00000036341,ENSGALP00000037222,ENSGALP00000038179,ENSGALP00000039133	BASP1,COL6A3,DDX1,EIF4A3,HDAC1,HMGB2,HMGB3,HNRNPDL,RAP1B,SLC9A3R1,SMU1,YWHAE
GO:0060255	regulation of macromolecule metabolic process	24	645	4.21e-21	ENSGALP00000003130,ENSGALP00000005212,ENSGALP00000006240,ENSGALP00000012367,ENSGALP00000014747,ENSGALP00000016120,ENSGALP00000017462,ENSGALP00000026509,ENSGALP00000036341,ENSGALP00000037222,ENSGALP00000038179,ENSGALP00000039133	BASP1,COL6A3,DDX1,EIF4A3,HDAC1,HMGB2,HMGB3,HNRNPDL,RAP1B,SLC9A3R1,SMU1,YWHAE
GO:0051179	localization	21	423	1.99e-20	ENSGALP00000004840,ENSGALP00000010754,ENSGALP00000012367,ENSGALP00000027976,ENSGALP00000038179,ENSGALP00000039133,ENSGALP00000040865	EIF4A3,HBE,LRP1,MAPRE1,RPA1,SLC9A3R1,YWHAE
GO:0016043	cellular component organization	22	526	4.64e-20	ENSGALP00000004840,ENSGALP00000005212,ENSGALP00000008131,ENSGALP00000014747,ENSGALP00000015277,ENSGALP00000015287,ENSGALP00000017462,ENSGALP00000026509,ENSGALP00000030864	CAPZA2,CAV1,DDX1,DPYSL2,HDAC1,HMGB2,HMGB3,RPA1,VCL
GO:0048519	negative regulation of biological process	21	453	7.17e-20	ENSGALP00000006240,ENSGALP00000010754,ENSGALP00000012367,ENSGALP00000014747,ENSGALP00000015277,ENSGALP00000016120,ENSGALP00000036341,ENSGALP00000038179,ENSGALP00000039133,ENSGALP00000042618	BASP1,CAPZA2,COL6A3,EIF4A3,HMGB3,MAPRE1,RAP1B,SLC9A3R1,TPT1,YWHAE
GO:0051716	cellular response to stimulus	22	560	1.58e-19	ENSGALP00000004840,ENSGALP00000011559,ENSGALP00000012367,ENSGALP00000016120,ENSGALP00000025525,ENSGALP00000026509,ENSGALP00000039133	CA2,DDX1,ITGB1,RAP1B,RPA1,SLC9A3R1,YWHAE
GO:0042221	response to chemical	19	331	2.37e-19	ENSGALP00000016120,ENSGALP00000017462,ENSGALP00000025525,ENSGALP00000027976,ENSGALP00000030864	CA2,DPYSL2,HBE,HMGB2,RAP1B
GO:0006996	organelle organization	14	345	1.12e-18	ENSGALP00000004840,ENSGALP00000005212,ENSGALP00000014747,ENSGALP00000017462,ENSGALP00000026509,ENSGALP00000030864	DDX1,DPYSL2,HDAC1,HMGB2,HMGB3,RPA1
GO:1901700	response to oxygen-containing compound	14	101	1.12e-18	ENSGALP00000016120,ENSGALP00000017462,ENSGALP00000025525	CA2,HMGB2,RAP1B
GO:0032879	regulation of localization	16	187	1.53e-18	ENSGALP00000008131,ENSGALP00000012367,ENSGALP00000016120,ENSGALP00000039133	RAP1B,SLC9A3R1,VCL,YWHAE
GO:0044267	cellular protein metabolic process	14	366	2.32e-18	ENSGALP00000000643,ENSGALP00000005212,ENSGALP00000026345,ENSGALP00000038957,ENSGALP00000039133	ACP1,HDAC1,RPL27,RPL36,YWHAE
GO:0044249	cellular biosynthetic process	15	548	6.52e-18	ENSGALP00000000643,ENSGALP00000004840,ENSGALP00000005212,ENSGALP00000014747,ENSGALP00000017462,ENSGALP00000026509,ENSGALP00000037222,ENSGALP00000038957	DDX1,HDAC1,HMGB2,HMGB3,HNRNPDL,RPA1,RPL27,RPL36
GO:0048523	negative regulation of cellular process	19	414	1.05e-17	ENSGALP00000006240,ENSGALP00000010754,ENSGALP00000012367,ENSGALP00000014747,ENSGALP00000015277,ENSGALP00000016120,ENSGALP00000036341,ENSGALP00000039133	BASP1,CAPZA2,COL6A3,HMGB3,MAPRE1,RAP1B,SLC9A3R1,YWHAE
GO:0001932	regulation of protein phosphorylation	11	130	2e-17	ENSGALP00000012367,ENSGALP00000016120	RAP1B,SLC9A3R1
GO:0044093	positive regulation of molecular function	11	139	3.92e-17
GO:0044092	negative regulation of molecular function	10	87	6.42e-17	ENSGALP00000006240,ENSGALP00000021314,ENSGALP00000039133	CALD1,COL6A3,YWHAE
GO:0032502	developmental process	20	601	3.3e-16	ENSGALP00000008131,ENSGALP00000016120,ENSGALP00000019399,ENSGALP00000030864,ENSGALP00000036341,ENSGALP00000039133,ENSGALP00000042618	BASP1,DPYSL2,RAP1B,TAGLN,TPT1,VCL,YWHAE
GO:0043170	macromolecule metabolic process	22	825	3.34e-16	ENSGALP00000000643,ENSGALP00000001957,ENSGALP00000003130,ENSGALP00000004840,ENSGALP00000005212,ENSGALP00000014747,ENSGALP00000017462,ENSGALP00000026345,ENSGALP00000026509,ENSGALP00000037222,ENSGALP00000038179,ENSGALP00000038957,ENSGALP00000039133	ACP1,DDX1,EIF4A3,HDAC1,HMGB2,HMGB3,HNRNPDL,RPA1,RPL27,RPL36,SMU1,SRRM1,YWHAE
GO:0051049	regulation of transport	13	120	4.22e-16	ENSGALP00000016120,ENSGALP00000039133	RAP1B,YWHAE
GO:0010646	regulation of cell communication	16	283	5.61e-16	ENSGALP00000012367,ENSGALP00000016120	RAP1B,SLC9A3R1
GO:0023051	regulation of signaling	16	289	7.52e-16	ENSGALP00000012367,ENSGALP00000016120	RAP1B,SLC9A3R1
GO:0010033	response to organic substance	15	230	9.3e-16	ENSGALP00000016120,ENSGALP00000017462,ENSGALP00000025525	CA2,HMGB2,RAP1B
GO:0006928	movement of cell or subcellular component	10	118	9.33e-16	ENSGALP00000004265,ENSGALP00000030864,ENSGALP00000039133	DPYSL2,MYO1C,YWHAE
GO:0032501	multicellular organismal process	20	644	9.99e-16	ENSGALP00000012367,ENSGALP00000021314,ENSGALP00000030864,ENSGALP00000036341,ENSGALP00000039133,ENSGALP00000042618	BASP1,CALD1,DPYSL2,SLC9A3R1,TPT1,YWHAE
GO:0032268	regulation of cellular protein metabolic process	15	241	1.68e-15	ENSGALP00000006240,ENSGALP00000012367,ENSGALP00000016120,ENSGALP00000038179,ENSGALP00000039133	COL6A3,EIF4A3,RAP1B,SLC9A3R1,YWHAE
GO:1902531	regulation of intracellular signal transduction	13	143	3.01e-15	ENSGALP00000012367,ENSGALP00000016120	RAP1B,SLC9A3R1
GO:0002376	immune system process	10	140	4.28e-15	ENSGALP00000014747,ENSGALP00000015287,ENSGALP00000017462	CAV1,HMGB2,HMGB3
GO:0035556	intracellular signal transduction	12	106	4.55e-15	ENSGALP00000016120,ENSGALP00000039133	RAP1B,YWHAE
GO:0065008	regulation of biological quality	16	330	4.6e-15	ENSGALP00000004840,ENSGALP00000015277,ENSGALP00000016120,ENSGALP00000030864,ENSGALP00000039133	CAPZA2,DPYSL2,RAP1B,RPA1,YWHAE
GO:0009605	response to external stimulus	13	154	6.59e-15	ENSGALP00000017462,ENSGALP00000030864	DPYSL2,HMGB2
GO:0050790	regulation of catalytic activity	14	208	7.1e-15	ENSGALP00000006240,ENSGALP00000012367,ENSGALP00000021314	CALD1,COL6A3,SLC9A3R1
GO:0070887	cellular response to chemical stimulus	14	216	1.15e-14	ENSGALP00000016120,ENSGALP00000025525	CA2,RAP1B
GO:0019220	regulation of phosphate metabolic process	13	164	1.34e-14	ENSGALP00000012367,ENSGALP00000016120,ENSGALP00000039133	RAP1B,SLC9A3R1,YWHAE
GO:1901564	organonitrogen compound metabolic process	18	534	1.37e-14	ENSGALP00000000643,ENSGALP00000005212,ENSGALP00000013294,ENSGALP00000026345,ENSGALP00000038957,ENSGALP00000039133	ACP1,HDAC1,NT5C2,RPL27,RPL36,YWHAE
GO:0031399	regulation of protein modification process	13	168	1.71e-14	ENSGALP00000012367,ENSGALP00000016120,ENSGALP00000039133	RAP1B,SLC9A3R1,YWHAE
GO:0044281	small molecule metabolic process	10	168	2e-14	ENSGALP00000013294,ENSGALP00000041792	LDHB,NT5C2
GO:0045595	regulation of cell differentiation	10	176	3.08e-14	ENSGALP00000014747,ENSGALP00000030864	DPYSL2,HMGB3
GO:0048856	anatomical structure development	18	565	3.33e-14	ENSGALP00000008131,ENSGALP00000016120,ENSGALP00000019399,ENSGALP00000030864,ENSGALP00000036341,ENSGALP00000039133	BASP1,DPYSL2,RAP1B,TAGLN,VCL,YWHAE
GO:0006725	cellular aromatic compound metabolic process	13	575	3.39e-14	ENSGALP00000001957,ENSGALP00000003130,ENSGALP00000004840,ENSGALP00000005212,ENSGALP00000013294,ENSGALP00000014747,ENSGALP00000017462,ENSGALP00000026509,ENSGALP00000037222,ENSGALP00000038179,ENSGALP00000038957	DDX1,EIF4A3,HDAC1,HMGB2,HMGB3,HNRNPDL,NT5C2,RPA1,RPL27,SMU1,SRRM1
GO:0065009	regulation of molecular function	15	306	3.55e-14	ENSGALP00000006240,ENSGALP00000012367,ENSGALP00000021314,ENSGALP00000039133	CALD1,COL6A3,SLC9A3R1,YWHAE
GO:0006355	regulation of transcription, DNA-templated	12	423	4.84e-14	ENSGALP00000005212,ENSGALP00000014747,ENSGALP00000017462,ENSGALP00000026509,ENSGALP00000036341,ENSGALP00000037222	BASP1,DDX1,HDAC1,HMGB2,HMGB3,HNRNPDL
GO:0060341	regulation of cellular localization	10	61	5.55e-14	ENSGALP00000016120,ENSGALP00000039133	RAP1B,YWHAE
GO:0043408	regulation of MAPK cascade	10	63	7.33e-14	ENSGALP00000016120	RAP1B
GO:0045596	negative regulation of cell differentiation	8	69	1.63e-13	ENSGALP00000014747	HMGB3
GO:0034641	cellular nitrogen compound metabolic process	18	630	1.85e-13	ENSGALP00000000643,ENSGALP00000001957,ENSGALP00000003130,ENSGALP00000004840,ENSGALP00000005212,ENSGALP00000013294,ENSGALP00000014747,ENSGALP00000017462,ENSGALP00000026509,ENSGALP00000037222,ENSGALP00000038179,ENSGALP00000038957	DDX1,EIF4A3,HDAC1,HMGB2,HMGB3,HNRNPDL,NT5C2,RPA1,RPL27,RPL36,SMU1,SRRM1
GO:0003008	system process	9	135	2.54e-13	ENSGALP00000012367,ENSGALP00000021314	CALD1,SLC9A3R1
GO:0043085	positive regulation of catalytic activity	11	113	3.3e-13
GO:0051128	regulation of cellular component organization	13	219	3.54e-13	ENSGALP00000010754,ENSGALP00000015277,ENSGALP00000016120,ENSGALP00000030864	CAPZA2,DPYSL2,MAPRE1,RAP1B
GO:0006629	lipid metabolic process	8	83	6.09e-13
GO:0019219	regulation of nucleobase-containing compound metabolic process	16	469	6.26e-13	ENSGALP00000003130,ENSGALP00000005212,ENSGALP00000014747,ENSGALP00000017462,ENSGALP00000026509,ENSGALP00000036341,ENSGALP00000037222,ENSGALP00000038179	BASP1,DDX1,EIF4A3,HDAC1,HMGB2,HMGB3,HNRNPDL,SMU1
GO:0044087	regulation of cellular component biogenesis	8	84	6.5e-13	ENSGALP00000010754,ENSGALP00000015277,ENSGALP00000016120	CAPZA2,MAPRE1,RAP1B
GO:0002237	response to molecule of bacterial origin	6	15	8.17e-13	ENSGALP00000017462	HMGB2
GO:0006139	nucleobase-containing compound metabolic process	12	553	9.16e-13	ENSGALP00000001957,ENSGALP00000003130,ENSGALP00000004840,ENSGALP00000005212,ENSGALP00000013294,ENSGALP00000014747,ENSGALP00000017462,ENSGALP00000026509,ENSGALP00000037222,ENSGALP00000038179,ENSGALP00000038957	DDX1,EIF4A3,HDAC1,HMGB2,HMGB3,HNRNPDL,NT5C2,RPA1,RPL27,SMU1,SRRM1
GO:0051093	negative regulation of developmental process	10	85	9.73e-13	ENSGALP00000014747,ENSGALP00000042618	HMGB3,TPT1
GO:0001934	positive regulation of protein phosphorylation	8	95	1.55e-12	ENSGALP00000016120	RAP1B
GO:0010468	regulation of gene expression	16	503	1.64e-12	ENSGALP00000003130,ENSGALP00000005212,ENSGALP00000014747,ENSGALP00000017462,ENSGALP00000026509,ENSGALP00000036341,ENSGALP00000037222,ENSGALP00000038179	BASP1,DDX1,EIF4A3,HDAC1,HMGB2,HMGB3,HNRNPDL,SMU1
GO:0051050	positive regulation of transport	9	57	1.78e-12	ENSGALP00000039133	YWHAE
GO:0002682	regulation of immune system process	8	99	2.04e-12	ENSGALP00000014747,ENSGALP00000015287	CAV1,HMGB3
GO:2000145	regulation of cell motility	9	61	3e-12	ENSGALP00000008131,ENSGALP00000012367	SLC9A3R1,VCL
GO:0051252	regulation of RNA metabolic process	15	447	5.37e-12	ENSGALP00000003130,ENSGALP00000005212,ENSGALP00000014747,ENSGALP00000017462,ENSGALP00000026509,ENSGALP00000036341,ENSGALP00000037222,ENSGALP00000038179	BASP1,DDX1,EIF4A3,HDAC1,HMGB2,HMGB3,HNRNPDL,SMU1
GO:0007166	cell surface receptor signaling pathway	12	214	6.81e-12	ENSGALP00000011559,ENSGALP00000012367	ITGB1,SLC9A3R1
GO:1901701	cellular response to oxygen-containing compound	9	68	6.95e-12	ENSGALP00000016120,ENSGALP00000025525	CA2,RAP1B
GO:0043086	negative regulation of catalytic activity	9	69	7.75e-12	ENSGALP00000006240,ENSGALP00000021314	CALD1,COL6A3
GO:0009058	biosynthetic process	16	566	8.41e-12	ENSGALP00000000643,ENSGALP00000004840,ENSGALP00000005212,ENSGALP00000014075,ENSGALP00000014747,ENSGALP00000017462,ENSGALP00000026509,ENSGALP00000037222,ENSGALP00000038957	C3H20ORF3,DDX1,HDAC1,HMGB2,HMGB3,HNRNPDL,RPA1,RPL27,RPL36
GO:0030154	cell differentiation	14	376	9.99e-12	ENSGALP00000016120,ENSGALP00000019399,ENSGALP00000030864,ENSGALP00000039133,ENSGALP00000042618	DPYSL2,RAP1B,TAGLN,TPT1,YWHAE
GO:0051641	cellular localization	11	163	1.09e-11	ENSGALP00000004840,ENSGALP00000010754,ENSGALP00000039133	MAPRE1,RPA1,YWHAE
GO:0048518	positive regulation of biological process	15	481	1.38e-11	ENSGALP00000015287,ENSGALP00000016120,ENSGALP00000039133	CAV1,RAP1B,YWHAE
GO:0002684	positive regulation of immune system process	7	67	1.48e-11	ENSGALP00000015287	CAV1
GO:0050793	regulation of developmental process	12	231	1.48e-11	ENSGALP00000014747,ENSGALP00000030864,ENSGALP00000042618	DPYSL2,HMGB3,TPT1
GO:0031326	regulation of cellular biosynthetic process	15	486	1.54e-11	ENSGALP00000005212,ENSGALP00000014747,ENSGALP00000017462,ENSGALP00000026509,ENSGALP00000036341,ENSGALP00000037222,ENSGALP00000038179	BASP1,DDX1,EIF4A3,HDAC1,HMGB2,HMGB3,HNRNPDL
GO:0006897	endocytosis	6	30	2.19e-11	ENSGALP00000040865	LRP1
GO:0045859	regulation of protein kinase activity	7	72	2.26e-11	ENSGALP00000012367	SLC9A3R1
GO:0042592	homeostatic process	10	125	2.68e-11	ENSGALP00000004840,ENSGALP00000039133	RPA1,YWHAE
GO:0006066	alcohol metabolic process	6	32	2.99e-11
GO:0071310	cellular response to organic substance	11	183	3.2e-11	ENSGALP00000016120	RAP1B
GO:0007275	multicellular organism development	15	524	4.1e-11	ENSGALP00000030864,ENSGALP00000036341,ENSGALP00000039133	BASP1,DPYSL2,YWHAE
GO:0060548	negative regulation of cell death	9	87	4.5e-11
GO:0010467	gene expression	14	440	6.69e-11	ENSGALP00000000643,ENSGALP00000001957,ENSGALP00000003130,ENSGALP00000005212,ENSGALP00000014747,ENSGALP00000017462,ENSGALP00000026509,ENSGALP00000037222,ENSGALP00000038179,ENSGALP00000038957	DDX1,EIF4A3,HDAC1,HMGB2,HMGB3,HNRNPDL,RPL27,RPL36,SMU1,SRRM1
GO:0032496	response to lipopolysaccharide	6	12	7.5e-11	ENSGALP00000017462	HMGB2
GO:0002573	myeloid leukocyte differentiation	5	12	8.15e-11
GO:0060627	regulation of vesicle-mediated transport	7	30	8.5e-11	ENSGALP00000016120	RAP1B
GO:0006955	immune response	7	90	8.71e-11	ENSGALP00000014747,ENSGALP00000017462	HMGB2,HMGB3
GO:0030334	regulation of cell migration	8	58	9.41e-11	ENSGALP00000008131	VCL
GO:0010648	negative regulation of cell communication	9	97	1.03e-10	ENSGALP00000012367,ENSGALP00000016120	RAP1B,SLC9A3R1
GO:0023057	negative regulation of signaling	9	97	1.03e-10	ENSGALP00000012367,ENSGALP00000016120	RAP1B,SLC9A3R1
GO:0030162	regulation of proteolysis	8	59	1.04e-10	ENSGALP00000006240	COL6A3
GO:0006464	cellular protein modification process	9	297	1.38e-10	ENSGALP00000005212,ENSGALP00000026345,ENSGALP00000039133	ACP1,HDAC1,YWHAE
GO:0010556	regulation of macromolecule biosynthetic process	14	470	1.41e-10	ENSGALP00000005212,ENSGALP00000014747,ENSGALP00000017462,ENSGALP00000026509,ENSGALP00000036341,ENSGALP00000037222,ENSGALP00000038179	BASP1,DDX1,EIF4A3,HDAC1,HMGB2,HMGB3,HNRNPDL
GO:0006952	defense response	7	103	1.97e-10	ENSGALP00000014747,ENSGALP00000017462	HMGB2,HMGB3
GO:0050804	modulation of chemical synaptic transmission	6	15	1.97e-10	ENSGALP00000016120	RAP1B
GO:0070374	positive regulation of ERK1 and ERK2 cascade	6	15	1.97e-10	ENSGALP00000016120	RAP1B
GO:0040011	locomotion	9	106	2.01e-10	ENSGALP00000030864,ENSGALP00000039133	DPYSL2,YWHAE
GO:0007399	nervous system development	11	225	2.21e-10	ENSGALP00000030864,ENSGALP00000039133	DPYSL2,YWHAE
GO:0045732	positive regulation of protein catabolic process	5	16	2.31e-10
GO:0046903	secretion	7	36	2.31e-10	ENSGALP00000012367	SLC9A3R1
GO:0022008	neurogenesis	10	166	2.96e-10	ENSGALP00000030864,ENSGALP00000039133	DPYSL2,YWHAE
GO:0010605	negative regulation of macromolecule metabolic process	11	233	3.05e-10	ENSGALP00000006240,ENSGALP00000036341,ENSGALP00000038179,ENSGALP00000039133	BASP1,COL6A3,EIF4A3,YWHAE
GO:0051336	regulation of hydrolase activity	9	115	3.73e-10	ENSGALP00000006240,ENSGALP00000021314	CALD1,COL6A3
GO:0051649	establishment of localization in cell	9	115	3.73e-10	ENSGALP00000039133	YWHAE
GO:0048878	chemical homeostasis	8	72	3.93e-10	ENSGALP00000039133	YWHAE
GO:0006811	ion transport	7	119	4.64e-10	ENSGALP00000012367	SLC9A3R1
GO:0051239	regulation of multicellular organismal process	11	244	4.68e-10	ENSGALP00000014747,ENSGALP00000030864	DPYSL2,HMGB3
GO:0043269	regulation of ion transport	7	41	4.8e-10	ENSGALP00000039133	YWHAE
GO:2000026	regulation of multicellular organismal development	10	183	6.74e-10	ENSGALP00000014747,ENSGALP00000030864	DPYSL2,HMGB3
GO:0048522	positive regulation of cellular process	13	434	7.26e-10	ENSGALP00000015287,ENSGALP00000016120	CAV1,RAP1B
GO:0045664	regulation of neuron differentiation	6	62	8.16e-10	ENSGALP00000030864	DPYSL2
GO:0042981	regulation of apoptotic process	9	129	8.85e-10
GO:0001505	regulation of neurotransmitter levels	5	23	9.6e-10	ENSGALP00000016120	RAP1B
GO:1901576	organic substance biosynthetic process	14	556	9.94e-10	ENSGALP00000000643,ENSGALP00000004840,ENSGALP00000005212,ENSGALP00000014747,ENSGALP00000017462,ENSGALP00000026509,ENSGALP00000037222,ENSGALP00000038957	DDX1,HDAC1,HMGB2,HMGB3,HNRNPDL,RPA1,RPL27,RPL36
GO:0051129	negative regulation of cellular component organization	7	47	1.05e-09	ENSGALP00000010754,ENSGALP00000015277	CAPZA2,MAPRE1
GO:0006874	cellular calcium ion homeostasis	5	24	1.12e-09	ENSGALP00000039133	YWHAE
GO:0045862	positive regulation of proteolysis	5	25	1.31e-09
GO:0009968	negative regulation of signal transduction	8	88	1.47e-09	ENSGALP00000012367	SLC9A3R1
GO:2000112	regulation of cellular macromolecule biosynthetic process	13	464	1.47e-09	ENSGALP00000005212,ENSGALP00000014747,ENSGALP00000017462,ENSGALP00000026509,ENSGALP00000036341,ENSGALP00000037222,ENSGALP00000038179	BASP1,DDX1,EIF4A3,HDAC1,HMGB2,HMGB3,HNRNPDL
GO:0009628	response to abiotic stimulus	8	89	1.58e-09	ENSGALP00000039133	YWHAE
GO:0032269	negative regulation of cellular protein metabolic process	8	89	1.58e-09	ENSGALP00000006240,ENSGALP00000039133	COL6A3,YWHAE
GO:0006898	receptor-mediated endocytosis	4	6	2.29e-09	ENSGALP00000040865	LRP1
GO:0051241	negative regulation of multicellular organismal process	8	94	2.31e-09	ENSGALP00000014747	HMGB3
GO:0045666	positive regulation of neuron differentiation	5	31	3.24e-09
GO:0045861	negative regulation of proteolysis	5	31	3.24e-09	ENSGALP00000006240	COL6A3
GO:0120036	plasma membrane bounded cell projection organization	8	99	3.32e-09	ENSGALP00000008131,ENSGALP00000030864	DPYSL2,VCL
GO:0045055	regulated exocytosis	4	7	3.47e-09
GO:0010243	response to organonitrogen compound	7	58	3.54e-09	ENSGALP00000016120	RAP1B
GO:0032386	regulation of intracellular transport	6	29	3.93e-09	ENSGALP00000016120,ENSGALP00000039133	RAP1B,YWHAE
GO:0033554	cellular response to stress	9	161	4.77e-09	ENSGALP00000004840,ENSGALP00000026509,ENSGALP00000039133	DDX1,RPA1,YWHAE
GO:0048699	generation of neurons	9	163	5.26e-09	ENSGALP00000030864,ENSGALP00000039133	DPYSL2,YWHAE
GO:0006954	inflammatory response	5	35	5.31e-09	ENSGALP00000017462	HMGB2
GO:0014070	response to organic cyclic compound	7	64	6.36e-09	ENSGALP00000016120	RAP1B
GO:0006396	RNA processing	6	95	7.32e-09	ENSGALP00000001957,ENSGALP00000003130,ENSGALP00000026509,ENSGALP00000038179,ENSGALP00000038957	DDX1,EIF4A3,RPL27,SMU1,SRRM1
GO:0051346	negative regulation of hydrolase activity	6	34	8.64e-09	ENSGALP00000006240,ENSGALP00000021314	CALD1,COL6A3
GO:0008203	cholesterol metabolic process	5	13	8.81e-09
GO:0032880	regulation of protein localization	7	68	8.99e-09	ENSGALP00000039133	YWHAE
GO:0033036	macromolecule localization	9	181	1.18e-08	ENSGALP00000004840,ENSGALP00000010754,ENSGALP00000038179,ENSGALP00000039133	EIF4A3,MAPRE1,RPA1,YWHAE
GO:0071900	regulation of protein serine/threonine kinase activity	6	37	1.3e-08
GO:1903827	regulation of cellular protein localization	6	38	1.48e-08	ENSGALP00000039133	YWHAE
GO:0007155	cell adhesion	6	109	1.49e-08	ENSGALP00000006240,ENSGALP00000008131,ENSGALP00000011559,ENSGALP00000011857	COL6A3,ITGB1,LPP,VCL
GO:0042493	response to drug	7	74	1.49e-08	ENSGALP00000017462,ENSGALP00000025525,ENSGALP00000027976	CA2,HBE,HMGB2
GO:0045184	establishment of protein localization	6	113	1.78e-08	ENSGALP00000039133	YWHAE
GO:0006796	phosphate-containing compound metabolic process	7	218	1.81e-08	ENSGALP00000013294,ENSGALP00000026345,ENSGALP00000039133	ACP1,NT5C2,YWHAE
GO:0019932	second-messenger-mediated signaling	5	16	1.88e-08
GO:0070482	response to oxygen levels	5	16	1.88e-08
GO:0050865	regulation of cell activation	6	41	2.1e-08	ENSGALP00000014747,ENSGALP00000015287	CAV1,HMGB3
GO:0001568	blood vessel development	5	49	2.13e-08
GO:0006935	chemotaxis	5	49	2.13e-08	ENSGALP00000030864	DPYSL2
GO:0043066	negative regulation of apoptotic process	7	80	2.3e-08
GO:0010942	positive regulation of cell death	6	42	2.34e-08
GO:0090066	regulation of anatomical structure size	6	43	2.62e-08	ENSGALP00000015277,ENSGALP00000030864	CAPZA2,DPYSL2
GO:0045087	innate immune response	5	52	2.68e-08	ENSGALP00000014747,ENSGALP00000017462	HMGB2,HMGB3
GO:0071219	cellular response to molecule of bacterial origin	4	4	2.68e-08
GO:0071705	nitrogen compound transport	8	136	2.7e-08	ENSGALP00000012367,ENSGALP00000038179,ENSGALP00000039133	EIF4A3,SLC9A3R1,YWHAE
GO:0050770	regulation of axonogenesis	5	18	2.86e-08	ENSGALP00000030864	DPYSL2
GO:0043254	regulation of protein complex assembly	6	44	2.88e-08	ENSGALP00000010754,ENSGALP00000015277	CAPZA2,MAPRE1
GO:0001666	response to hypoxia	4	15	3.03e-08
GO:0051172	negative regulation of nitrogen compound metabolic process	9	207	3.05e-08	ENSGALP00000006240,ENSGALP00000036341,ENSGALP00000039133	BASP1,COL6A3,YWHAE
GO:0006397	mRNA processing	5	56	3.67e-08	ENSGALP00000001957,ENSGALP00000003130,ENSGALP00000026509,ENSGALP00000038179	DDX1,EIF4A3,SMU1,SRRM1
GO:0032101	regulation of response to external stimulus	6	47	4.04e-08
GO:0031324	negative regulation of cellular metabolic process	9	220	4.99e-08	ENSGALP00000006240,ENSGALP00000036341,ENSGALP00000039133	BASP1,COL6A3,YWHAE
GO:1903829	positive regulation of cellular protein localization	5	21	5.28e-08	ENSGALP00000039133	YWHAE
GO:0000904	cell morphogenesis involved in differentiation	5	61	5.29e-08	ENSGALP00000030864	DPYSL2
GO:0008104	protein localization	8	150	5.29e-08	ENSGALP00000004840,ENSGALP00000010754,ENSGALP00000039133	MAPRE1,RPA1,YWHAE
GO:0044271	cellular nitrogen compound biosynthetic process	8	431	5.62e-08	ENSGALP00000000643,ENSGALP00000005212,ENSGALP00000014747,ENSGALP00000017462,ENSGALP00000026509,ENSGALP00000037222,ENSGALP00000038957	DDX1,HDAC1,HMGB2,HMGB3,HNRNPDL,RPL27,RPL36
GO:0048666	neuron development	7	94	5.83e-08	ENSGALP00000030864	DPYSL2
GO:0031667	response to nutrient levels	5	22	6.32e-08
GO:0080134	regulation of response to stress	7	96	6.61e-08
GO:0006518	peptide metabolic process	5	65	6.95e-08	ENSGALP00000000643,ENSGALP00000038957	RPL27,RPL36
GO:0046907	intracellular transport	7	97	7.01e-08	ENSGALP00000039133	YWHAE
GO:0009653	anatomical structure morphogenesis	9	233	7.58e-08	ENSGALP00000008131,ENSGALP00000030864	DPYSL2,VCL
GO:0034645	cellular macromolecule biosynthetic process	11	438	1.01e-07	ENSGALP00000000643,ENSGALP00000004840,ENSGALP00000005212,ENSGALP00000014747,ENSGALP00000017462,ENSGALP00000026509,ENSGALP00000037222,ENSGALP00000038957	DDX1,HDAC1,HMGB2,HMGB3,HNRNPDL,RPA1,RPL27,RPL36
GO:0071702	organic substance transport	8	165	1.02e-07	ENSGALP00000012367,ENSGALP00000038179,ENSGALP00000039133	EIF4A3,SLC9A3R1,YWHAE
GO:0006469	negative regulation of protein kinase activity	4	22	1.04e-07
GO:0051222	positive regulation of protein transport	5	25	1.05e-07	ENSGALP00000039133	YWHAE
GO:0007613	memory	4	7	1.07e-07
GO:0043271	negative regulation of ion transport	4	7	1.07e-07	ENSGALP00000039133	YWHAE
GO:0044282	small molecule catabolic process	4	23	1.19e-07
GO:0045665	negative regulation of neuron differentiation	4	23	1.19e-07
GO:0043405	regulation of MAP kinase activity	5	26	1.21e-07
GO:0003013	circulatory system process	4	24	1.36e-07
GO:1901214	regulation of neuron death	5	27	1.42e-07
GO:0048468	cell development	8	175	1.49e-07	ENSGALP00000016120,ENSGALP00000030864	DPYSL2,RAP1B
GO:0006979	response to oxidative stress	4	25	1.56e-07
GO:0044085	cellular component biogenesis	9	258	1.63e-07	ENSGALP00000008131,ENSGALP00000015287,ENSGALP00000038957	CAV1,RPL27,VCL
GO:0051051	negative regulation of transport	5	28	1.64e-07	ENSGALP00000016120,ENSGALP00000039133	RAP1B,YWHAE
GO:0015833	peptide transport	7	113	1.7e-07	ENSGALP00000012367,ENSGALP00000039133	SLC9A3R1,YWHAE
GO:0007568	aging	4	9	2.15e-07
GO:0048513	animal organ development	9	272	2.45e-07	ENSGALP00000030864,ENSGALP00000039133	DPYSL2,YWHAE
GO:0006509	membrane protein ectodomain proteolysis	3	4	2.55e-07
GO:0045807	positive regulation of endocytosis	3	4	2.55e-07
GO:0090304	nucleic acid metabolic process	11	486	2.55e-07	ENSGALP00000001957,ENSGALP00000003130,ENSGALP00000004840,ENSGALP00000005212,ENSGALP00000014747,ENSGALP00000017462,ENSGALP00000026509,ENSGALP00000037222,ENSGALP00000038179,ENSGALP00000038957	DDX1,EIF4A3,HDAC1,HMGB2,HMGB3,HNRNPDL,RPA1,RPL27,SMU1,SRRM1
GO:0048167	regulation of synaptic plasticity	4	10	2.92e-07
GO:0016477	cell migration	6	72	3.46e-07	ENSGALP00000039133	YWHAE
GO:0048638	regulation of developmental growth	5	34	3.69e-07	ENSGALP00000030864	DPYSL2
GO:0097305	response to alcohol	4	11	3.92e-07
GO:0002690	positive regulation of leukocyte chemotaxis	3	5	3.95e-07
GO:0006357	regulation of transcription by RNA polymerase II	6	208	4.18e-07	ENSGALP00000017462	HMGB2
GO:0031175	neuron projection development	6	76	4.55e-07	ENSGALP00000030864	DPYSL2
GO:0016070	RNA metabolic process	10	403	4.96e-07	ENSGALP00000001957,ENSGALP00000003130,ENSGALP00000005212,ENSGALP00000014747,ENSGALP00000017462,ENSGALP00000026509,ENSGALP00000037222,ENSGALP00000038179,ENSGALP00000038957	DDX1,EIF4A3,HDAC1,HMGB2,HMGB3,HNRNPDL,RPL27,SMU1,SRRM1
GO:0009719	response to endogenous stimulus	7	136	5.23e-07	ENSGALP00000016120	RAP1B
GO:0032535	regulation of cellular component size	5	37	5.23e-07	ENSGALP00000015277,ENSGALP00000030864	CAPZA2,DPYSL2
GO:0052548	regulation of endopeptidase activity	5	37	5.23e-07	ENSGALP00000006240	COL6A3
GO:0051896	regulation of protein kinase B signaling	4	13	6.48e-07	ENSGALP00000012367	SLC9A3R1
GO:0043065	positive regulation of apoptotic process	5	39	6.5e-07
GO:0071417	cellular response to organonitrogen compound	5	39	6.5e-07	ENSGALP00000016120	RAP1B
GO:1902903	regulation of supramolecular fiber organization	5	39	6.5e-07	ENSGALP00000010754,ENSGALP00000015277	CAPZA2,MAPRE1
GO:0009056	catabolic process	7	142	6.73e-07	ENSGALP00000038179	EIF4A3
GO:0002694	regulation of leukocyte activation	4	39	6.92e-07	ENSGALP00000014747,ENSGALP00000015287	CAV1,HMGB3
GO:0008361	regulation of cell size	4	14	8e-07	ENSGALP00000030864	DPYSL2
GO:0061024	membrane organization	5	42	8.75e-07	ENSGALP00000015287	CAV1
GO:0003018	vascular process in circulatory system	3	8	1.04e-06
GO:0022607	cellular component assembly	8	234	1.06e-06	ENSGALP00000008131,ENSGALP00000015287	CAV1,VCL
GO:0032374	regulation of cholesterol transport	3	2	1.08e-06
GO:0042127	regulation of cell population proliferation	7	154	1.08e-06
GO:0050435	amyloid-beta metabolic process	3	2	1.08e-06
GO:0050918	positive chemotaxis	3	2	1.08e-06
GO:0070723	response to cholesterol	3	2	1.08e-06
GO:1905906	regulation of amyloid fibril formation	3	2	1.08e-06
GO:0010629	negative regulation of gene expression	7	156	1.15e-06	ENSGALP00000036341,ENSGALP00000038179	BASP1,EIF4A3
GO:0010632	regulation of epithelial cell migration	4	16	1.19e-06
GO:0032388	positive regulation of intracellular transport	4	16	1.19e-06	ENSGALP00000039133	YWHAE
GO:0007409	axonogenesis	5	46	1.25e-06	ENSGALP00000030864	DPYSL2
GO:0031400	negative regulation of protein modification process	5	46	1.25e-06	ENSGALP00000039133	YWHAE
GO:0045936	negative regulation of phosphate metabolic process	5	46	1.25e-06	ENSGALP00000039133	YWHAE
GO:0009888	tissue development	7	159	1.27e-06	ENSGALP00000008131,ENSGALP00000016120,ENSGALP00000019399	RAP1B,TAGLN,VCL
GO:0034613	cellular protein localization	6	95	1.36e-06	ENSGALP00000004840,ENSGALP00000010754,ENSGALP00000039133	MAPRE1,RPA1,YWHAE
GO:1901215	negative regulation of neuron death	4	18	1.71e-06
GO:0055114	oxidation-reduction process	6	102	1.98e-06	ENSGALP00000002822,ENSGALP00000019979,ENSGALP00000041792	ADH1C,GLYR1,LDHB
GO:0007584	response to nutrient	3	3	2e-06
GO:0031644	regulation of neurological system process	3	3	2e-06
GO:0042982	amyloid precursor protein metabolic process	3	3	2e-06
GO:0061045	negative regulation of wound healing	3	3	2e-06
GO:1902041	regulation of extrinsic apoptotic signaling pathway via death domain receptors	3	3	2e-06
GO:0010959	regulation of metal ion transport	4	19	2.02e-06	ENSGALP00000039133	YWHAE
GO:0051347	positive regulation of transferase activity	5	52	2.07e-06
GO:0007267	cell-cell signaling	6	106	2.39e-06	ENSGALP00000012367	SLC9A3R1
GO:0042063	gliogenesis	4	20	2.39e-06
GO:0043393	regulation of protein binding	4	20	2.39e-06
GO:0006605	protein targeting	3	12	2.53e-06	ENSGALP00000039133	YWHAE
GO:0002274	myeloid leukocyte activation	3	13	3.07e-06
GO:0007420	brain development	5	57	3.07e-06	ENSGALP00000030864,ENSGALP00000039133	DPYSL2,YWHAE
GO:0034097	response to cytokine	5	57	3.07e-06
GO:0050808	synapse organization	4	22	3.25e-06
GO:0021782	glial cell development	3	4	3.3e-06
GO:0043535	regulation of blood vessel endothelial cell migration	3	4	3.3e-06
GO:0050818	regulation of coagulation	3	4	3.3e-06
GO:0051345	positive regulation of hydrolase activity	5	58	3.3e-06
GO:0071222	cellular response to lipopolysaccharide	3	4	3.3e-06
GO:0099175	regulation of postsynapse organization	3	4	3.3e-06
GO:1905908	positive regulation of amyloid fibril formation	3	4	3.3e-06
GO:0031331	positive regulation of cellular catabolic process	4	23	3.69e-06
GO:0008015	blood circulation	4	24	4.26e-06
GO:0010951	negative regulation of endopeptidase activity	4	24	4.26e-06	ENSGALP00000006240	COL6A3
GO:1901575	organic substance catabolic process	6	121	4.64e-06	ENSGALP00000038179	EIF4A3
GO:0046683	response to organophosphorus	3	5	5.01e-06	ENSGALP00000016120	RAP1B
GO:0071453	cellular response to oxygen levels	3	5	5.01e-06
GO:1901216	positive regulation of neuron death	3	5	5.01e-06
GO:0019221	cytokine-mediated signaling pathway	4	26	5.56e-06
GO:0035239	tube morphogenesis	5	66	5.64e-06
GO:0001764	neuron migration	3	17	5.76e-06	ENSGALP00000039133	YWHAE
GO:0000003	reproduction	4	74	6.01e-06
GO:0010035	response to inorganic substance	4	27	6.27e-06	ENSGALP00000025525	CA2
GO:0034765	regulation of ion transmembrane transport	4	27	6.27e-06	ENSGALP00000039133	YWHAE
GO:0050730	regulation of peptidyl-tyrosine phosphorylation	4	27	6.27e-06
GO:0006915	apoptotic process	4	76	6.59e-06
GO:0007219	Notch signaling pathway	3	6	7.22e-06
GO:0042632	cholesterol homeostasis	3	6	7.22e-06
GO:0043266	regulation of potassium ion transport	3	6	7.22e-06	ENSGALP00000039133	YWHAE
GO:0046164	alcohol catabolic process	3	6	7.22e-06
GO:0001667	ameboidal-type cell migration	3	20	8.67e-06
GO:0002263	cell activation involved in immune response	3	20	8.67e-06
GO:0006082	organic acid metabolic process	4	82	8.67e-06	ENSGALP00000041792	LDHB
GO:0007411	axon guidance	4	30	8.89e-06	ENSGALP00000030864	DPYSL2
GO:0014074	response to purine-containing compound	3	7	1e-05	ENSGALP00000016120	RAP1B
GO:0035023	regulation of Rho protein signal transduction	3	7	1e-05
GO:0043542	endothelial cell migration	3	7	1e-05
GO:0106027	neuron projection organization	3	7	1e-05
GO:0006869	lipid transport	3	22	1.09e-05
GO:0051276	chromosome organization	6	144	1.12e-05	ENSGALP00000004840,ENSGALP00000005212,ENSGALP00000014747,ENSGALP00000017462,ENSGALP00000026509	DDX1,HDAC1,HMGB2,HMGB3,RPA1
GO:0007268	chemical synaptic transmission	4	34	1.34e-05
GO:0032412	regulation of ion transmembrane transporter activity	3	8	1.34e-05	ENSGALP00000039133	YWHAE
GO:0043409	negative regulation of MAPK cascade	3	8	1.34e-05
GO:0060998	regulation of dendritic spine development	3	8	1.34e-05
GO:0071901	negative regulation of protein serine/threonine kinase activity	3	8	1.34e-05
GO:0010469	regulation of signaling receptor activity	5	82	1.42e-05
GO:1902532	negative regulation of intracellular signal transduction	4	36	1.64e-05	ENSGALP00000012367	SLC9A3R1
GO:0032092	positive regulation of protein binding	3	9	1.73e-05
GO:0090316	positive regulation of intracellular protein transport	3	9	1.73e-05	ENSGALP00000039133	YWHAE
GO:1903364	positive regulation of cellular protein catabolic process	3	9	1.73e-05
GO:0030900	forebrain development	4	37	1.78e-05	ENSGALP00000039133	YWHAE
GO:0006820	anion transport	3	27	1.81e-05	ENSGALP00000012367	SLC9A3R1
GO:0060429	epithelium development	5	88	1.91e-05	ENSGALP00000008131,ENSGALP00000016120,ENSGALP00000019399	RAP1B,TAGLN,VCL
GO:0002696	positive regulation of leukocyte activation	3	28	2e-05	ENSGALP00000015287	CAV1
GO:0042391	regulation of membrane potential	4	39	2.13e-05	ENSGALP00000039133	YWHAE
GO:0071407	cellular response to organic cyclic compound	4	39	2.13e-05	ENSGALP00000016120	RAP1B
GO:0003007	heart morphogenesis	3	29	2.17e-05
GO:0006816	calcium ion transport	3	29	2.17e-05
GO:0030516	regulation of axon extension	3	10	2.17e-05	ENSGALP00000030864	DPYSL2
GO:1901888	regulation of cell junction assembly	3	10	2.17e-05	ENSGALP00000016120	RAP1B
GO:1902947	regulation of tau-protein kinase activity	3	10	2.17e-05
GO:0045892	negative regulation of transcription, DNA-templated	4	108	2.2e-05	ENSGALP00000036341	BASP1
GO:0009636	response to toxic substance	4	40	2.27e-05
GO:0033365	protein localization to organelle	4	40	2.27e-05	ENSGALP00000004840,ENSGALP00000010754	MAPRE1,RPA1
GO:0001101	response to acid chemical	3	30	2.32e-05
GO:0034248	regulation of cellular amide metabolic process	4	41	2.47e-05	ENSGALP00000038179	EIF4A3
GO:0002090	regulation of receptor internalization	2	2	2.8e-05
GO:0006911	phagocytosis, engulfment	2	2	2.8e-05
GO:0007009	plasma membrane organization	2	2	2.8e-05	ENSGALP00000015287	CAV1
GO:0033043	regulation of organelle organization	5	98	2.97e-05	ENSGALP00000010754,ENSGALP00000015277	CAPZA2,MAPRE1
GO:0048514	blood vessel morphogenesis	4	44	3.15e-05
GO:1901566	organonitrogen compound biosynthetic process	6	177	3.15e-05	ENSGALP00000000643,ENSGALP00000038957	RPL27,RPL36
GO:0010977	negative regulation of neuron projection development	3	12	3.28e-05
GO:0042157	lipoprotein metabolic process	3	12	3.28e-05
GO:0001525	angiogenesis	3	35	3.47e-05
GO:0021543	pallium development	3	13	3.98e-05	ENSGALP00000039133	YWHAE
GO:0050866	negative regulation of cell activation	3	13	3.98e-05	ENSGALP00000014747	HMGB3
GO:0008380	RNA splicing	4	48	4.24e-05	ENSGALP00000001957,ENSGALP00000003130,ENSGALP00000026509,ENSGALP00000038179	DDX1,EIF4A3,SMU1,SRRM1
GO:0044248	cellular catabolic process	4	131	4.37e-05	ENSGALP00000038179	EIF4A3
GO:0010628	positive regulation of gene expression	6	189	4.41e-05
GO:0000381	regulation of alternative mRNA splicing, via spliceosome	2	3	4.49e-05	ENSGALP00000003130,ENSGALP00000038179	EIF4A3,SMU1
GO:0002265	astrocyte activation involved in immune response	2	3	4.49e-05
GO:0002444	myeloid leukocyte mediated immunity	2	3	4.49e-05
GO:0055085	transmembrane transport	5	108	4.5e-05
GO:0007626	locomotory behavior	3	14	4.71e-05
GO:0051604	protein maturation	3	14	4.71e-05
GO:0051924	regulation of calcium ion transport	3	14	4.71e-05	ENSGALP00000039133	YWHAE
GO:1904062	regulation of cation transmembrane transport	3	14	4.71e-05	ENSGALP00000039133	YWHAE
GO:0080135	regulation of cellular response to stress	4	50	4.83e-05
GO:0006351	transcription, DNA-templated	5	302	5.2e-05	ENSGALP00000005212,ENSGALP00000014747,ENSGALP00000017462,ENSGALP00000026509,ENSGALP00000037222	DDX1,HDAC1,HMGB2,HMGB3,HNRNPDL
GO:0003006	developmental process involved in reproduction	3	41	5.21e-05
GO:0019216	regulation of lipid metabolic process	3	15	5.54e-05
GO:0021700	developmental maturation	3	15	5.54e-05
GO:0032872	regulation of stress-activated MAPK cascade	3	15	5.54e-05
GO:2001234	negative regulation of apoptotic signaling pathway	3	15	5.54e-05
GO:0044703	multi-organism reproductive process	3	43	5.84e-05
GO:0050776	regulation of immune response	4	54	6.23e-05
GO:0032392	DNA geometric change	3	16	6.41e-05	ENSGALP00000014747,ENSGALP00000017462,ENSGALP00000026509	DDX1,HMGB2,HMGB3
GO:0043270	positive regulation of ion transport	3	16	6.41e-05
GO:0050878	regulation of body fluid levels	3	16	6.41e-05
GO:0051091	positive regulation of DNA-binding transcription factor activity	3	16	6.41e-05
GO:0051480	regulation of cytosolic calcium ion concentration	3	16	6.41e-05	ENSGALP00000039133	YWHAE
GO:0097237	cellular response to toxic substance	3	16	6.41e-05
GO:0045860	positive regulation of protein kinase activity	3	48	7.76e-05
GO:0043281	regulation of cysteine-type endopeptidase activity involved in apoptotic process	3	18	8.56e-05
GO:1902003	regulation of amyloid-beta formation	3	18	8.56e-05
GO:2000146	negative regulation of cell motility	3	18	8.56e-05	ENSGALP00000012367	SLC9A3R1
GO:0002009	morphogenesis of an epithelium	3	50	8.62e-05	ENSGALP00000008131	VCL
GO:0044091	membrane biogenesis	2	5	8.65e-05	ENSGALP00000015287	CAV1
GO:0015711	organic anion transport	3	19	9.76e-05	ENSGALP00000012367	SLC9A3R1
GO:0008285	negative regulation of cell population proliferation	4	62	9.99e-05
GO:0050731	positive regulation of peptidyl-tyrosine phosphorylation	3	20	0.00011
GO:0031333	negative regulation of protein complex assembly	3	21	0.00013	ENSGALP00000010754,ENSGALP00000015277	CAPZA2,MAPRE1
GO:0043062	extracellular structure organization	3	21	0.00013
GO:0043523	regulation of neuron apoptotic process	3	21	0.00013
GO:0007186	G protein-coupled receptor signaling pathway	4	68	0.00014
GO:0043406	positive regulation of MAP kinase activity	3	22	0.00014
GO:0060828	regulation of canonical Wnt signaling pathway	3	22	0.00014
GO:0044255	cellular lipid metabolic process	3	61	0.00015
GO:0007220	Notch receptor processing	2	2	0.00016
GO:0030193	regulation of blood coagulation	2	2	0.00016
GO:0032370	positive regulation of lipid transport	2	2	0.00016
GO:0032768	regulation of monooxygenase activity	2	2	0.00016
GO:0042987	amyloid precursor protein catabolic process	2	2	0.00016
GO:0043491	protein kinase B signaling	2	2	0.00016
GO:0043691	reverse cholesterol transport	2	2	0.00016
GO:0050819	negative regulation of coagulation	2	2	0.00016
GO:0050850	positive regulation of calcium-mediated signaling	2	2	0.00016
GO:0051563	smooth endoplasmic reticulum calcium ion homeostasis	2	2	0.00016
GO:0051705	multi-organism behavior	2	2	0.00016
GO:0051926	negative regulation of calcium ion transport	2	2	0.00016	ENSGALP00000039133	YWHAE
GO:0070168	negative regulation of biomineral tissue development	2	2	0.00016
GO:0090647	modulation of age-related behavioral decline	2	2	0.00016
GO:0097028	dendritic cell differentiation	2	2	0.00016
GO:0097755	positive regulation of blood vessel diameter	2	2	0.00016
GO:1901653	cellular response to peptide	3	23	0.00016
GO:1902042	negative regulation of extrinsic apoptotic signaling pathway via death domain receptors	2	2	0.00016
GO:1902950	regulation of dendritic spine maintenance	2	2	0.00016
GO:1905668	positive regulation of protein localization to endosome	2	2	0.00016
GO:2000272	negative regulation of signaling receptor activity	2	2	0.00016
GO:0002275	myeloid cell activation involved in immune response	2	8	0.00017
GO:0006836	neurotransmitter transport	2	8	0.00017
GO:0010976	positive regulation of neuron projection development	3	24	0.00017
GO:0048608	reproductive structure development	3	24	0.00017
GO:0010639	negative regulation of organelle organization	3	25	0.00019	ENSGALP00000010754,ENSGALP00000015277	CAPZA2,MAPRE1
GO:0046486	glycerolipid metabolic process	3	25	0.00019
GO:0050727	regulation of inflammatory response	3	25	0.00019
GO:0045834	positive regulation of lipid metabolic process	2	9	0.0002
GO:0000122	negative regulation of transcription by RNA polymerase II	3	71	0.00021
GO:0019752	carboxylic acid metabolic process	4	79	0.00022	ENSGALP00000041792	LDHB
GO:0007176	regulation of epidermal growth factor-activated receptor activity	2	3	0.00024
GO:0010633	negative regulation of epithelial cell migration	2	3	0.00024
GO:0015914	phospholipid transport	2	3	0.00024
GO:0019098	reproductive behavior	2	3	0.00024
GO:0021766	hippocampus development	2	3	0.00024	ENSGALP00000039133	YWHAE
GO:0030316	osteoclast differentiation	2	3	0.00024
GO:0032459	regulation of protein oligomerization	2	3	0.00024
GO:0043267	negative regulation of potassium ion transport	2	3	0.00024
GO:0043299	leukocyte degranulation	2	3	0.00024
GO:0043407	negative regulation of MAP kinase activity	2	3	0.00024
GO:0043536	positive regulation of blood vessel endothelial cell migration	2	3	0.00024
GO:0045638	negative regulation of myeloid cell differentiation	2	10	0.00024	ENSGALP00000014747	HMGB3
GO:0048260	positive regulation of receptor-mediated endocytosis	2	3	0.00024
GO:0048732	gland development	3	28	0.00024
GO:0048844	artery morphogenesis	2	3	0.00024
GO:0050795	regulation of behavior	2	3	0.00024
GO:0050905	neuromuscular process	2	3	0.00024
GO:0051851	modification by host of symbiont morphology or physiology	2	3	0.00024
GO:0071320	cellular response to cAMP	2	3	0.00024	ENSGALP00000016120	RAP1B
GO:0071827	plasma lipoprotein particle organization	2	3	0.00024
GO:0098693	regulation of synaptic vesicle cycle	2	3	0.00024	ENSGALP00000016120	RAP1B
GO:1900271	regulation of long-term synaptic potentiation	2	3	0.00024
GO:1902996	regulation of neurofibrillary tangle assembly	2	3	0.00024
GO:1903793	positive regulation of anion transport	2	3	0.00024
GO:1904591	positive regulation of protein import	2	3	0.00024
GO:1905809	negative regulation of synapse organization	2	3	0.00024
GO:1990535	neuron projection maintenance	2	3	0.00024
GO:2000401	regulation of lymphocyte migration	2	3	0.00024
GO:0006707	cholesterol catabolic process	2	11	0.00027
GO:0032147	activation of protein kinase activity	3	30	0.00029
GO:0050678	regulation of epithelial cell proliferation	3	30	0.00029
GO:0000302	response to reactive oxygen species	2	12	0.00031
GO:0001936	regulation of endothelial cell proliferation	2	12	0.00031
GO:0002768	immune response-regulating cell surface receptor signaling pathway	2	12	0.00031
GO:0006839	mitochondrial transport	2	12	0.00031
GO:0045017	glycerolipid biosynthetic process	2	12	0.00031
GO:0060249	anatomical structure homeostasis	3	31	0.00031	ENSGALP00000004840	RPA1
GO:0032413	negative regulation of ion transmembrane transporter activity	2	4	0.00033	ENSGALP00000039133	YWHAE
GO:0036230	granulocyte activation	2	4	0.00033
GO:0042136	neurotransmitter biosynthetic process	2	4	0.00033
GO:0048854	brain morphogenesis	2	4	0.00033
GO:0051043	regulation of membrane protein ectodomain proteolysis	2	4	0.00033
GO:0051898	negative regulation of protein kinase B signaling	2	4	0.00033	ENSGALP00000012367	SLC9A3R1
GO:0071456	cellular response to hypoxia	2	4	0.00033
GO:0097006	regulation of plasma lipoprotein particle levels	2	4	0.00033
GO:1904063	negative regulation of cation transmembrane transport	2	4	0.00033	ENSGALP00000039133	YWHAE
GO:1904646	cellular response to amyloid-beta	2	4	0.00033
GO:1990090	cellular response to nerve growth factor stimulus	2	4	0.00033
GO:0001952	regulation of cell-matrix adhesion	2	13	0.00035
GO:0007033	vacuole organization	2	13	0.00035
GO:0000165	MAPK cascade	2	14	0.00039	ENSGALP00000039133	YWHAE
GO:0001816	cytokine production	2	14	0.00039
GO:0001894	tissue homeostasis	2	14	0.00039
GO:0016311	dephosphorylation	3	34	0.00039	ENSGALP00000013294,ENSGALP00000026345	ACP1,NT5C2
GO:0045766	positive regulation of angiogenesis	2	14	0.00039
GO:0009891	positive regulation of biosynthetic process	5	186	0.00041
GO:0043009	chordate embryonic development	3	35	0.00041
GO:0006959	humoral immune response	2	15	0.00044
GO:0007269	neurotransmitter secretion	2	5	0.00044
GO:0019722	calcium-mediated signaling	2	5	0.00044
GO:0048008	platelet-derived growth factor receptor signaling pathway	2	5	0.00044
GO:0051402	neuron apoptotic process	2	5	0.00044
GO:0055081	anion homeostasis	2	5	0.00044
GO:0071709	membrane assembly	2	5	0.00044	ENSGALP00000015287	CAV1
GO:0097306	cellular response to alcohol	2	5	0.00044
GO:1901016	regulation of potassium ion transmembrane transporter activity	2	5	0.00044	ENSGALP00000039133	YWHAE
GO:0006974	cellular response to DNA damage stimulus	3	106	0.00057	ENSGALP00000004840,ENSGALP00000026509	DDX1,RPA1
GO:0016485	protein processing	2	6	0.00057
GO:0043687	post-translational protein modification	2	6	0.00057
GO:0046824	positive regulation of nucleocytoplasmic transport	2	6	0.00057	ENSGALP00000039133	YWHAE
GO:0050771	negative regulation of axonogenesis	2	6	0.00057
GO:0050805	negative regulation of synaptic transmission	2	6	0.00057	ENSGALP00000016120	RAP1B
GO:0051438	regulation of ubiquitin-protein transferase activity	2	6	0.00057
GO:0060999	positive regulation of dendritic spine development	2	6	0.00057
GO:0071356	cellular response to tumor necrosis factor	2	6	0.00057
GO:0071621	granulocyte chemotaxis	2	6	0.00057
GO:1900180	regulation of protein localization to nucleus	2	6	0.00057
GO:1901361	organic cyclic compound catabolic process	3	40	0.00057	ENSGALP00000038179	EIF4A3
GO:1903305	regulation of regulated secretory pathway	2	6	0.00057	ENSGALP00000016120	RAP1B
GO:0016055	Wnt signaling pathway	3	41	0.0006	ENSGALP00000012367	SLC9A3R1
GO:0045137	development of primary sexual characteristics	2	19	0.00063
GO:0030855	epithelial cell differentiation	3	42	0.00064	ENSGALP00000016120,ENSGALP00000019399	RAP1B,TAGLN
GO:0019953	sexual reproduction	3	43	0.00068
GO:0009791	post-embryonic development	2	7	0.0007
GO:0010501	RNA secondary structure unwinding	2	7	0.0007	ENSGALP00000026509,ENSGALP00000038179	DDX1,EIF4A3
GO:0015718	monocarboxylic acid transport	2	7	0.0007	ENSGALP00000012367	SLC9A3R1
GO:0032489	regulation of Cdc42 protein signal transduction	2	7	0.0007
GO:0035333	Notch receptor processing, ligand-dependent	2	7	0.0007
GO:0046889	positive regulation of lipid biosynthetic process	2	7	0.0007
GO:0070555	response to interleukin-1	2	7	0.0007
GO:1902106	negative regulation of leukocyte differentiation	2	7	0.0007	ENSGALP00000014747	HMGB3
GO:1902966	positive regulation of protein localization to early endosome	2	7	0.0007
GO:0007010	cytoskeleton organization	3	117	0.00071	ENSGALP00000030864	DPYSL2
GO:0051253	negative regulation of RNA metabolic process	4	116	0.00074	ENSGALP00000036341	BASP1
GO:0006259	DNA metabolic process	3	120	0.00076	ENSGALP00000004840,ENSGALP00000017462,ENSGALP00000026509	DDX1,HMGB2,RPA1
GO:0006650	glycerophospholipid metabolic process	2	22	0.0008
GO:0003012	muscle system process	2	23	0.00085	ENSGALP00000021314	CALD1
GO:0043280	positive regulation of cysteine-type endopeptidase activity involved in apoptotic process	2	8	0.00085
GO:0048469	cell maturation	2	8	0.00085
GO:0050806	positive regulation of synaptic transmission	2	8	0.00085
GO:0051588	regulation of neurotransmitter transport	2	8	0.00085	ENSGALP00000016120	RAP1B
GO:0051897	positive regulation of protein kinase B signaling	2	8	0.00085
GO:0098869	cellular oxidant detoxification	2	8	0.00085
GO:2000060	positive regulation of ubiquitin-dependent protein catabolic process	2	8	0.00085
GO:2001235	positive regulation of apoptotic signaling pathway	2	8	0.00085
GO:0001655	urogenital system development	2	25	0.00099
GO:0002092	positive regulation of receptor internalization	2	26	0.001
GO:0007018	microtubule-based movement	2	26	0.001	ENSGALP00000004265	MYO1C
GO:0007416	synapse assembly	2	9	0.001
GO:0032874	positive regulation of stress-activated MAPK cascade	2	9	0.001
GO:0034250	positive regulation of cellular amide metabolic process	2	9	0.001
GO:0050792	regulation of viral process	2	9	0.001
GO:0051651	maintenance of location in cell	2	9	0.001
GO:0051893	regulation of focal adhesion assembly	2	9	0.001
GO:0099173	postsynapse organization	2	9	0.001
GO:1900272	negative regulation of long-term synaptic potentiation	2	9	0.001
GO:1902430	negative regulation of amyloid-beta formation	2	9	0.001
GO:1905330	regulation of morphogenesis of an epithelium	2	9	0.001
GO:0006470	protein dephosphorylation	2	27	0.0011	ENSGALP00000026345	ACP1
GO:0016358	dendrite development	2	10	0.0012
GO:0019935	cyclic-nucleotide-mediated signaling	2	10	0.0012
GO:0042158	lipoprotein biosynthetic process	2	10	0.0012
GO:0050729	positive regulation of inflammatory response	2	10	0.0012
GO:0050830	defense response to Gram-positive bacterium	2	10	0.0012	ENSGALP00000017462	HMGB2
GO:0090090	negative regulation of canonical Wnt signaling pathway	2	10	0.0012
GO:0007005	mitochondrion organization	2	31	0.0014
GO:0008283	cell population proliferation	3	58	0.0014	ENSGALP00000016120	RAP1B
GO:0021987	cerebral cortex development	2	11	0.0014	ENSGALP00000039133	YWHAE
GO:0030534	adult behavior	2	11	0.0014
GO:0045785	positive regulation of cell adhesion	2	31	0.0014	ENSGALP00000015287	CAV1
GO:0046474	glycerophospholipid biosynthetic process	2	11	0.0014
GO:0050680	negative regulation of epithelial cell proliferation	2	11	0.0014
GO:1902004	positive regulation of amyloid-beta formation	2	11	0.0014
GO:0006520	cellular amino acid metabolic process	2	33	0.0016
GO:0007204	positive regulation of cytosolic calcium ion concentration	2	12	0.0016
GO:0008585	female gonad development	2	12	0.0016
GO:0014066	regulation of phosphatidylinositol 3-kinase signaling	2	12	0.0016	ENSGALP00000012367	SLC9A3R1
GO:0017038	protein import	2	12	0.0016
GO:0033700	phospholipid efflux	2	12	0.0016
GO:0065003	protein-containing complex assembly	4	148	0.0016
GO:0006302	double-strand break repair	2	35	0.0017	ENSGALP00000004840,ENSGALP00000026509	DDX1,RPA1
GO:0034380	high-density lipoprotein particle assembly	2	13	0.0018
GO:0061000	negative regulation of dendritic spine development	2	13	0.0018
GO:0006310	DNA recombination	2	38	0.002	ENSGALP00000004840,ENSGALP00000017462	HMGB2,RPA1
GO:0006417	regulation of translation	2	38	0.002	ENSGALP00000038179	EIF4A3
GO:0010038	response to metal ion	2	14	0.002
GO:0043524	negative regulation of neuron apoptotic process	2	14	0.002
GO:0050829	defense response to Gram-negative bacterium	2	14	0.002	ENSGALP00000017462	HMGB2
GO:0051100	negative regulation of binding	2	14	0.002
GO:0017144	drug metabolic process	3	68	0.0021	ENSGALP00000013294	NT5C2
GO:0009408	response to heat	2	15	0.0022	ENSGALP00000039133	YWHAE
GO:0010875	positive regulation of cholesterol efflux	2	15	0.0022
GO:0031056	regulation of histone modification	2	15	0.0022
GO:0032272	negative regulation of protein polymerization	2	15	0.0022	ENSGALP00000010754,ENSGALP00000015277	CAPZA2,MAPRE1
GO:1901565	organonitrogen compound catabolic process	3	70	0.0022
GO:0009057	macromolecule catabolic process	3	72	0.0024	ENSGALP00000038179	EIF4A3
GO:0005975	carbohydrate metabolic process	2	44	0.0025	ENSGALP00000041792	LDHB
GO:0007264	small GTPase mediated signal transduction	2	16	0.0025	ENSGALP00000016120	RAP1B
GO:0008360	regulation of cell shape	2	16	0.0025
GO:0030324	lung development	2	16	0.0025
GO:0035335	peptidyl-tyrosine dephosphorylation	2	16	0.0025	ENSGALP00000026345	ACP1
GO:0051044	positive regulation of membrane protein ectodomain proteolysis	2	16	0.0025
GO:0033138	positive regulation of peptidyl-serine phosphorylation	2	17	0.0027
GO:0051494	negative regulation of cytoskeleton organization	2	17	0.0027	ENSGALP00000010754,ENSGALP00000015277	CAPZA2,MAPRE1
GO:1902904	negative regulation of supramolecular fiber organization	2	17	0.0027	ENSGALP00000010754,ENSGALP00000015277	CAPZA2,MAPRE1
GO:0010544	negative regulation of platelet activation	2	18	0.003
GO:0044089	positive regulation of cellular component biogenesis	2	48	0.003
GO:0060070	canonical Wnt signaling pathway	2	18	0.003
GO:0071229	cellular response to acid chemical	2	18	0.003
GO:1901990	regulation of mitotic cell cycle phase transition	2	18	0.003
GO:0045935	positive regulation of nucleobase-containing compound metabolic process	4	181	0.0032
GO:0007188	adenylate cyclase-modulating G protein-coupled receptor signaling pathway	2	19	0.0033
GO:0007263	nitric oxide mediated signal transduction	2	19	0.0033
GO:0031328	positive regulation of cellular biosynthetic process	4	183	0.0033
GO:0048738	cardiac muscle tissue development	2	19	0.0033
GO:0006412	translation	2	52	0.0034	ENSGALP00000000643,ENSGALP00000038957	RPL27,RPL36
GO:0001654	eye development	2	54	0.0036
GO:0007617	mating behavior	2	20	0.0036
GO:0008284	positive regulation of cell population proliferation	3	84	0.0036
GO:0072594	establishment of protein localization to organelle	2	20	0.0036
GO:0030225	macrophage differentiation	2	21	0.0039
GO:0035690	cellular response to drug	2	22	0.0042	ENSGALP00000025525	CA2
GO:0070588	calcium ion transmembrane transport	2	22	0.0042
GO:0021953	central nervous system neuron differentiation	2	23	0.0045
GO:0048872	homeostasis of number of cells	2	23	0.0045
GO:0019637	organophosphate metabolic process	3	94	0.0048	ENSGALP00000013294	NT5C2
GO:0033344	cholesterol efflux	2	24	0.0049
GO:1901605	alpha-amino acid metabolic process	2	25	0.0052
GO:2000463	positive regulation of excitatory postsynaptic potential	2	26	0.0056
GO:0062012	regulation of small molecule metabolic process	2	27	0.006
GO:0071214	cellular response to abiotic stimulus	2	27	0.006
GO:0048511	rhythmic process	2	29	0.0068
GO:1903532	positive regulation of secretion by cell	2	29	0.0068
GO:0043547	positive regulation of GTPase activity	2	30	0.0072
GO:0060562	epithelial tube morphogenesis	2	30	0.0072
GO:0031663	lipopolysaccharide-mediated signaling pathway	2	31	0.0076
GO:0042311	vasodilation	2	31	0.0076
GO:2000403	positive regulation of lymphocyte migration	2	31	0.0076
GO:0032787	monocarboxylic acid metabolic process	2	35	0.0095	ENSGALP00000041792	LDHB
GO:0034405	response to fluid shear stress	2	35	0.0095
GO:0006325	chromatin organization	2	94	0.0099	ENSGALP00000005212	HDAC1
GO:0051249	regulation of lymphocyte activation	2	37	0.0105	ENSGALP00000014747,ENSGALP00000015287	CAV1,HMGB3
GO:0034470	ncRNA processing	2	39	0.0115	ENSGALP00000026509,ENSGALP00000038957	DDX1,RPL27
GO:0048589	developmental growth	2	40	0.0121
GO:0050778	positive regulation of immune response	2	40	0.0121
GO:1905953	negative regulation of lipid localization	2	40	0.0121
GO:0051186	cofactor metabolic process	2	44	0.0144
GO:0098609	cell-cell adhesion	2	44	0.0144	ENSGALP00000008131	VCL
GO:0043010	camera-type eye development	2	45	0.0149
GO:0050999	regulation of nitric-oxide synthase activity	2	45	0.0149
GO:0045893	positive regulation of transcription, DNA-templated	3	147	0.0154
GO:0030163	protein catabolic process	2	49	0.0174
GO:0002576	platelet degranulation	2	129	0.0178
GO:0048168	regulation of neuronal synaptic plasticity	2	51	0.0186
GO:0051254	positive regulation of RNA metabolic process	3	166	0.021
GO:0048568	embryonic organ development	2	56	0.022
GO:0070925	organelle assembly	2	71	0.0339
GO:0009725	response to hormone	2	74	0.0365

## Sheet: GO CF-up DOH
Gene Ontology Terms with upregulated proteins in CF treatment at Day of hatch (DOH)
#term ID	term description	observed gene count	background gene count	false discovery rate	matching proteins in your network (IDs)	matching proteins in your network (labels)
GO:0009987	cellular process	37	1590	2.9e-23	ENSGALP00000000170,ENSGALP00000003139,ENSGALP00000003455,ENSGALP00000005562,ENSGALP00000005565,ENSGALP00000005633,ENSGALP00000006311,ENSGALP00000007707,ENSGALP00000008849,ENSGALP00000009853,ENSGALP00000011291,ENSGALP00000011559,ENSGALP00000012744,ENSGALP00000013585,ENSGALP00000013968,ENSGALP00000014097,ENSGALP00000016629,ENSGALP00000016689,ENSGALP00000018742,ENSGALP00000019616,ENSGALP00000021028,…	ACTN1,ACTN4,ALDOC,APOOL,CAMK2D,CKB,CKMT1A,COL6A2,DSTN,EEF1A1,EEF1B2,EMC1,ERP29,GLUD1,GNB2L1,HIST1H46,HSPB1,ITGB1,LEPRE1,MAGT1,MTPN,MYLK,PON2,PPIB,PPP2CB,PRDX1,RAB10,RBBP4,RDX,RPL7,RPS6,SEC22B,SRSF1,TPM1,YARS,ZNF326,ZYX
GO:0008152	metabolic process	24	1070	1.53e-12	ENSGALP00000000170,ENSGALP00000003139,ENSGALP00000003455,ENSGALP00000005565,ENSGALP00000005633,ENSGALP00000007707,ENSGALP00000008849,ENSGALP00000009505,ENSGALP00000009853,ENSGALP00000012744,ENSGALP00000013585,ENSGALP00000013968,ENSGALP00000016629,ENSGALP00000016630,ENSGALP00000016689,ENSGALP00000018742,ENSGALP00000019616,ENSGALP00000024283,ENSGALP00000025165,ENSGALP00000025606,ENSGALP00000037183,…	AKR1A1,ALDOC,CAMK2D,CKB,CKMT1A,EEF1A1,EEF1B2,GLUD1,GNB2L1,HIST1H46,IGLL1,LEPRE1,MAGT1,MYLK,PON2,PPIB,PPP2CB,PRDX1,RBBP4,RPL7,RPS6,SRSF1,YARS,ZNF326
GO:0044237	cellular metabolic process	22	988	2.71e-11	ENSGALP00000000170,ENSGALP00000003139,ENSGALP00000003455,ENSGALP00000005565,ENSGALP00000005633,ENSGALP00000007707,ENSGALP00000008849,ENSGALP00000009853,ENSGALP00000012744,ENSGALP00000013585,ENSGALP00000013968,ENSGALP00000016629,ENSGALP00000016689,ENSGALP00000018742,ENSGALP00000019616,ENSGALP00000024283,ENSGALP00000025165,ENSGALP00000025606,ENSGALP00000037183,ENSGALP00000037229,ENSGALP00000041526,…	ALDOC,CAMK2D,CKB,CKMT1A,EEF1A1,EEF1B2,GLUD1,GNB2L1,HIST1H46,LEPRE1,MAGT1,MYLK,PON2,PPIB,PPP2CB,PRDX1,RBBP4,RPL7,RPS6,SRSF1,YARS,ZNF326
GO:0006807	nitrogen compound metabolic process	20	930	7.71e-10	ENSGALP00000000170,ENSGALP00000003139,ENSGALP00000003455,ENSGALP00000005565,ENSGALP00000005633,ENSGALP00000007707,ENSGALP00000008849,ENSGALP00000009505,ENSGALP00000009853,ENSGALP00000012744,ENSGALP00000013968,ENSGALP00000016689,ENSGALP00000018742,ENSGALP00000019616,ENSGALP00000024283,ENSGALP00000025165,ENSGALP00000025606,ENSGALP00000037183,ENSGALP00000041526,ENSGALP00000043256	ALDOC,CAMK2D,CKB,EEF1A1,EEF1B2,GLUD1,GNB2L1,HIST1H46,IGLL1,LEPRE1,MAGT1,MYLK,PPIB,PPP2CB,RBBP4,RPL7,RPS6,SRSF1,YARS,ZNF326
GO:0065007	biological regulation	22	1189	7.71e-10	ENSGALP00000000170,ENSGALP00000003684,ENSGALP00000005565,ENSGALP00000007707,ENSGALP00000009505,ENSGALP00000009853,ENSGALP00000011509,ENSGALP00000011559,ENSGALP00000014097,ENSGALP00000016629,ENSGALP00000016689,ENSGALP00000019616,ENSGALP00000021028,ENSGALP00000023085,ENSGALP00000023626,ENSGALP00000024283,ENSGALP00000036002,ENSGALP00000037183,ENSGALP00000039447,ENSGALP00000041526,ENSGALP00000041744,…	ACTN4,CAMK2D,DSTN,GNB2L1,GPC1,HIST1H46,HSPB1,IGLL1,ITGB1,LEPRE1,MTPN,MYLK,PPP2CB,PRDX1,RAB10,RBBP4,RDX,RPS6,SEC22B,TNC,ZNF326,ZYX
GO:0044238	primary metabolic process	20	971	1.11e-09	ENSGALP00000000170,ENSGALP00000003139,ENSGALP00000003455,ENSGALP00000005565,ENSGALP00000005633,ENSGALP00000007707,ENSGALP00000008849,ENSGALP00000009505,ENSGALP00000009853,ENSGALP00000012744,ENSGALP00000013968,ENSGALP00000016689,ENSGALP00000018742,ENSGALP00000019616,ENSGALP00000024283,ENSGALP00000025165,ENSGALP00000025606,ENSGALP00000037183,ENSGALP00000041526,ENSGALP00000043256	ALDOC,CAMK2D,CKB,EEF1A1,EEF1B2,GLUD1,GNB2L1,HIST1H46,IGLL1,LEPRE1,MAGT1,MYLK,PPIB,PPP2CB,RBBP4,RPL7,RPS6,SRSF1,YARS,ZNF326
GO:0050789	regulation of biological process	21	1114	1.11e-09	ENSGALP00000000170,ENSGALP00000003684,ENSGALP00000005565,ENSGALP00000007707,ENSGALP00000009505,ENSGALP00000009853,ENSGALP00000011509,ENSGALP00000011559,ENSGALP00000014097,ENSGALP00000016629,ENSGALP00000016689,ENSGALP00000019616,ENSGALP00000021028,ENSGALP00000023085,ENSGALP00000023626,ENSGALP00000036002,ENSGALP00000037183,ENSGALP00000039447,ENSGALP00000041526,ENSGALP00000041744,ENSGALP00000042167	ACTN4,CAMK2D,DSTN,GNB2L1,GPC1,HIST1H46,HSPB1,IGLL1,ITGB1,LEPRE1,MTPN,MYLK,PPP2CB,PRDX1,RAB10,RBBP4,RDX,SEC22B,TNC,ZNF326,ZYX
GO:0071840	cellular component organization or biogenesis	16	547	1.11e-09	ENSGALP00000005562,ENSGALP00000005565,ENSGALP00000011291,ENSGALP00000014097,ENSGALP00000016689,ENSGALP00000021028,ENSGALP00000023626,ENSGALP00000024283,ENSGALP00000025165,ENSGALP00000031979,ENSGALP00000036002,ENSGALP00000039447,ENSGALP00000041526,ENSGALP00000041744,ENSGALP00000042167,ENSGALP00000042596	ACTN1,APOOL,COL6A2,DSTN,HIST1H46,HSPB1,MTPN,PPP2CB,RAB10,RBBP4,RDX,RPL7,RPS6,SEC22B,TPM1,ZYX
GO:1901564	organonitrogen compound metabolic process	16	534	1.11e-09	ENSGALP00000000170,ENSGALP00000003139,ENSGALP00000003455,ENSGALP00000005633,ENSGALP00000007707,ENSGALP00000009505,ENSGALP00000012744,ENSGALP00000013968,ENSGALP00000016689,ENSGALP00000018742,ENSGALP00000019616,ENSGALP00000024283,ENSGALP00000025165,ENSGALP00000025606,ENSGALP00000037183,ENSGALP00000043256	ALDOC,CAMK2D,CKB,EEF1A1,EEF1B2,GLUD1,GNB2L1,IGLL1,LEPRE1,MAGT1,MYLK,PPIB,PPP2CB,RPL7,RPS6,YARS
GO:0071704	organic substance metabolic process	20	1008	1.3e-09	ENSGALP00000000170,ENSGALP00000003139,ENSGALP00000003455,ENSGALP00000005565,ENSGALP00000005633,ENSGALP00000007707,ENSGALP00000008849,ENSGALP00000009505,ENSGALP00000009853,ENSGALP00000012744,ENSGALP00000013968,ENSGALP00000016689,ENSGALP00000018742,ENSGALP00000019616,ENSGALP00000024283,ENSGALP00000025165,ENSGALP00000025606,ENSGALP00000037183,ENSGALP00000041526,ENSGALP00000043256	ALDOC,CAMK2D,CKB,EEF1A1,EEF1B2,GLUD1,GNB2L1,HIST1H46,IGLL1,LEPRE1,MAGT1,MYLK,PPIB,PPP2CB,RBBP4,RPL7,RPS6,SRSF1,YARS,ZNF326
GO:0050794	regulation of cellular process	19	1051	2.2e-08	ENSGALP00000000170,ENSGALP00000003684,ENSGALP00000005565,ENSGALP00000007707,ENSGALP00000009853,ENSGALP00000011509,ENSGALP00000011559,ENSGALP00000014097,ENSGALP00000016629,ENSGALP00000019616,ENSGALP00000021028,ENSGALP00000023085,ENSGALP00000023626,ENSGALP00000036002,ENSGALP00000037183,ENSGALP00000039447,ENSGALP00000041526,ENSGALP00000041744,ENSGALP00000042167	ACTN4,CAMK2D,DSTN,GNB2L1,GPC1,HIST1H46,HSPB1,ITGB1,LEPRE1,MTPN,MYLK,PRDX1,RAB10,RBBP4,RDX,SEC22B,TNC,ZNF326,ZYX
GO:0043170	macromolecule metabolic process	17	825	3.35e-08	ENSGALP00000000170,ENSGALP00000003455,ENSGALP00000005565,ENSGALP00000005633,ENSGALP00000007707,ENSGALP00000008849,ENSGALP00000009505,ENSGALP00000009853,ENSGALP00000012744,ENSGALP00000013968,ENSGALP00000016689,ENSGALP00000019616,ENSGALP00000024283,ENSGALP00000025165,ENSGALP00000025606,ENSGALP00000037183,ENSGALP00000041526	CAMK2D,EEF1A1,EEF1B2,GNB2L1,HIST1H46,IGLL1,LEPRE1,MAGT1,MYLK,PPIB,PPP2CB,RBBP4,RPL7,RPS6,SRSF1,YARS,ZNF326
GO:0019538	protein metabolic process	13	412	3.78e-08	ENSGALP00000000170,ENSGALP00000003455,ENSGALP00000005633,ENSGALP00000007707,ENSGALP00000009505,ENSGALP00000012744,ENSGALP00000013968,ENSGALP00000016689,ENSGALP00000019616,ENSGALP00000024283,ENSGALP00000025165,ENSGALP00000025606,ENSGALP00000037183	CAMK2D,EEF1A1,EEF1B2,GNB2L1,IGLL1,LEPRE1,MAGT1,MYLK,PPIB,PPP2CB,RPL7,RPS6,YARS
GO:0016043	cellular component organization	14	526	5.84e-08	ENSGALP00000005562,ENSGALP00000005565,ENSGALP00000011291,ENSGALP00000014097,ENSGALP00000016689,ENSGALP00000021028,ENSGALP00000023626,ENSGALP00000031979,ENSGALP00000036002,ENSGALP00000039447,ENSGALP00000041526,ENSGALP00000041744,ENSGALP00000042167,ENSGALP00000042596	ACTN1,APOOL,COL6A2,DSTN,HIST1H46,HSPB1,MTPN,PPP2CB,RAB10,RBBP4,RDX,SEC22B,TPM1,ZYX
GO:0044267	cellular protein metabolic process	12	366	1.11e-07	ENSGALP00000000170,ENSGALP00000003455,ENSGALP00000005633,ENSGALP00000007707,ENSGALP00000012744,ENSGALP00000013968,ENSGALP00000016689,ENSGALP00000019616,ENSGALP00000024283,ENSGALP00000025165,ENSGALP00000025606,ENSGALP00000037183	CAMK2D,EEF1A1,EEF1B2,GNB2L1,LEPRE1,MAGT1,MYLK,PPIB,PPP2CB,RPL7,RPS6,YARS
GO:1901566	organonitrogen compound biosynthetic process	9	177	3.73e-07	ENSGALP00000000170,ENSGALP00000005633,ENSGALP00000012744,ENSGALP00000013968,ENSGALP00000018742,ENSGALP00000024283,ENSGALP00000025165,ENSGALP00000025606,ENSGALP00000043256	ALDOC,CKB,EEF1A1,EEF1B2,GNB2L1,MAGT1,RPL7,RPS6,YARS
GO:0006457	protein folding	5	23	1.35e-06	ENSGALP00000003455,ENSGALP00000006311,ENSGALP00000007707,ENSGALP00000038209,ENSGALP00000039447	EMC1,ERP29,HSPB1,LEPRE1,PPIB
GO:0006412	translation	6	52	1.41e-06	ENSGALP00000000170,ENSGALP00000005633,ENSGALP00000013968,ENSGALP00000024283,ENSGALP00000025165,ENSGALP00000025606	EEF1A1,EEF1B2,GNB2L1,RPL7,RPS6,YARS
GO:0044260	cellular macromolecule metabolic process	14	721	2.07e-06	ENSGALP00000000170,ENSGALP00000003455,ENSGALP00000005565,ENSGALP00000005633,ENSGALP00000007707,ENSGALP00000012744,ENSGALP00000013968,ENSGALP00000016689,ENSGALP00000019616,ENSGALP00000024283,ENSGALP00000025165,ENSGALP00000025606,ENSGALP00000037183,ENSGALP00000041526	CAMK2D,EEF1A1,EEF1B2,GNB2L1,HIST1H46,LEPRE1,MAGT1,MYLK,PPIB,PPP2CB,RBBP4,RPL7,RPS6,YARS
GO:0006518	peptide metabolic process	6	65	4.16e-06	ENSGALP00000000170,ENSGALP00000005633,ENSGALP00000013968,ENSGALP00000024283,ENSGALP00000025165,ENSGALP00000025606	EEF1A1,EEF1B2,GNB2L1,RPL7,RPS6,YARS
GO:0006996	organelle organization	10	345	5.91e-06	ENSGALP00000005562,ENSGALP00000005565,ENSGALP00000011291,ENSGALP00000014097,ENSGALP00000016689,ENSGALP00000023626,ENSGALP00000031979,ENSGALP00000036002,ENSGALP00000041526,ENSGALP00000041744	ACTN1,APOOL,DSTN,HIST1H46,PPP2CB,RAB10,RBBP4,SEC22B,TPM1,ZYX
GO:0030834	regulation of actin filament depolymerization	4	15	1.23e-05	ENSGALP00000014097,ENSGALP00000021028,ENSGALP00000039447,ENSGALP00000042167	DSTN,HSPB1,MTPN,RDX
GO:0050896	response to stimulus	13	718	1.23e-05	ENSGALP00000000170,ENSGALP00000009505,ENSGALP00000011559,ENSGALP00000016629,ENSGALP00000016689,ENSGALP00000019616,ENSGALP00000023085,ENSGALP00000023626,ENSGALP00000025606,ENSGALP00000036002,ENSGALP00000037229,ENSGALP00000038523,ENSGALP00000039447	ACTN4,ATP2A2,CAMK2D,EEF1A1,GNB2L1,HSPB1,IGLL1,ITGB1,PON2,PPP2CB,PRDX1,RAB10,ZYX
GO:0034641	cellular nitrogen compound metabolic process	12	630	2e-05	ENSGALP00000000170,ENSGALP00000005565,ENSGALP00000005633,ENSGALP00000008849,ENSGALP00000009853,ENSGALP00000013968,ENSGALP00000018742,ENSGALP00000024283,ENSGALP00000025165,ENSGALP00000025606,ENSGALP00000041526,ENSGALP00000043256	ALDOC,CKB,EEF1A1,EEF1B2,GNB2L1,HIST1H46,RBBP4,RPL7,RPS6,SRSF1,YARS,ZNF326
GO:0044271	cellular nitrogen compound biosynthetic process	10	431	3.32e-05	ENSGALP00000000170,ENSGALP00000005565,ENSGALP00000005633,ENSGALP00000013968,ENSGALP00000018742,ENSGALP00000024283,ENSGALP00000025165,ENSGALP00000025606,ENSGALP00000041526,ENSGALP00000043256	ALDOC,CKB,EEF1A1,EEF1B2,GNB2L1,HIST1H46,RBBP4,RPL7,RPS6,YARS
GO:0044249	cellular biosynthetic process	11	548	3.48e-05	ENSGALP00000000170,ENSGALP00000005565,ENSGALP00000005633,ENSGALP00000012744,ENSGALP00000013968,ENSGALP00000018742,ENSGALP00000024283,ENSGALP00000025165,ENSGALP00000025606,ENSGALP00000041526,ENSGALP00000043256	ALDOC,CKB,EEF1A1,EEF1B2,GNB2L1,HIST1H46,MAGT1,RBBP4,RPL7,RPS6,YARS
GO:0010467	gene expression	10	440	3.73e-05	ENSGALP00000000170,ENSGALP00000005565,ENSGALP00000005633,ENSGALP00000008849,ENSGALP00000009853,ENSGALP00000013968,ENSGALP00000024283,ENSGALP00000025165,ENSGALP00000025606,ENSGALP00000041526	EEF1A1,EEF1B2,GNB2L1,HIST1H46,RBBP4,RPL7,RPS6,SRSF1,YARS,ZNF326
GO:1901576	organic substance biosynthetic process	11	556	3.76e-05	ENSGALP00000000170,ENSGALP00000005565,ENSGALP00000005633,ENSGALP00000012744,ENSGALP00000013968,ENSGALP00000018742,ENSGALP00000024283,ENSGALP00000025165,ENSGALP00000025606,ENSGALP00000041526,ENSGALP00000043256	ALDOC,CKB,EEF1A1,EEF1B2,GNB2L1,HIST1H46,MAGT1,RBBP4,RPL7,RPS6,YARS
GO:0006414	translational elongation	3	6	6.18e-05	ENSGALP00000000170,ENSGALP00000013968,ENSGALP00000025606	EEF1A1,EEF1B2,GNB2L1
GO:0007015	actin filament organization	4	30	9.48e-05	ENSGALP00000005562,ENSGALP00000014097,ENSGALP00000023626,ENSGALP00000031979	ACTN1,DSTN,TPM1,ZYX
GO:0061077	chaperone-mediated protein folding	3	8	0.00011	ENSGALP00000003455,ENSGALP00000007707,ENSGALP00000039447	HSPB1,LEPRE1,PPIB
GO:0006796	phosphate-containing compound metabolic process	7	218	0.00015	ENSGALP00000013585,ENSGALP00000016689,ENSGALP00000018742,ENSGALP00000019616,ENSGALP00000037183,ENSGALP00000037229,ENSGALP00000043256	ALDOC,CAMK2D,CKB,CKMT1A,MYLK,PON2,PPP2CB
GO:0044087	regulation of cellular component biogenesis	5	84	0.00019	ENSGALP00000000170,ENSGALP00000021028,ENSGALP00000039447,ENSGALP00000041744,ENSGALP00000042167	GNB2L1,HSPB1,MTPN,RDX,SEC22B
GO:0034645	cellular macromolecule biosynthetic process	9	438	0.0002	ENSGALP00000000170,ENSGALP00000005565,ENSGALP00000005633,ENSGALP00000012744,ENSGALP00000013968,ENSGALP00000024283,ENSGALP00000025165,ENSGALP00000025606,ENSGALP00000041526	EEF1A1,EEF1B2,GNB2L1,HIST1H46,MAGT1,RBBP4,RPL7,RPS6,YARS
GO:0042221	response to chemical	8	331	0.0002	ENSGALP00000000170,ENSGALP00000016629,ENSGALP00000016689,ENSGALP00000023626,ENSGALP00000025606,ENSGALP00000036002,ENSGALP00000037229,ENSGALP00000038523	ATP2A2,EEF1A1,GNB2L1,PON2,PPP2CB,PRDX1,RAB10,ZYX
GO:0065008	regulation of biological quality	8	330	0.0002	ENSGALP00000000170,ENSGALP00000007707,ENSGALP00000014097,ENSGALP00000016629,ENSGALP00000021028,ENSGALP00000024283,ENSGALP00000039447,ENSGALP00000042167	DSTN,GNB2L1,HSPB1,LEPRE1,MTPN,PRDX1,RDX,RPS6
GO:0043254	regulation of protein complex assembly	4	44	0.00028	ENSGALP00000000170,ENSGALP00000021028,ENSGALP00000039447,ENSGALP00000042167	GNB2L1,HSPB1,MTPN,RDX
GO:0033043	regulation of organelle organization	5	98	0.00032	ENSGALP00000014097,ENSGALP00000021028,ENSGALP00000039447,ENSGALP00000041744,ENSGALP00000042167	DSTN,HSPB1,MTPN,RDX,SEC22B
GO:0044085	cellular component biogenesis	7	258	0.00033	ENSGALP00000005565,ENSGALP00000023626,ENSGALP00000024283,ENSGALP00000025165,ENSGALP00000031979,ENSGALP00000041526,ENSGALP00000042596	ACTN1,COL6A2,HIST1H46,RBBP4,RPL7,RPS6,ZYX
GO:0051129	negative regulation of cellular component organization	4	47	0.00033	ENSGALP00000000170,ENSGALP00000021028,ENSGALP00000039447,ENSGALP00000041744	GNB2L1,HSPB1,RDX,SEC22B
GO:0048518	positive regulation of biological process	9	481	0.00035	ENSGALP00000000170,ENSGALP00000003684,ENSGALP00000009505,ENSGALP00000014097,ENSGALP00000023085,ENSGALP00000037183,ENSGALP00000039447,ENSGALP00000041744,ENSGALP00000042167	ACTN4,DSTN,GNB2L1,GPC1,HSPB1,IGLL1,MTPN,MYLK,SEC22B
GO:0015031	protein transport	5	110	0.0005	ENSGALP00000012007,ENSGALP00000023085,ENSGALP00000036002,ENSGALP00000038209,ENSGALP00000041744	ACTN4,ARCN1,ERP29,RAB10,SEC22B
GO:0060255	regulation of macromolecule metabolic process	10	645	0.00054	ENSGALP00000000170,ENSGALP00000005565,ENSGALP00000007707,ENSGALP00000009853,ENSGALP00000016629,ENSGALP00000016689,ENSGALP00000023085,ENSGALP00000039447,ENSGALP00000041744,ENSGALP00000042167	ACTN4,GNB2L1,HSPB1,LEPRE1,MTPN,PPP2CB,PRDX1,RBBP4,SEC22B,ZNF326
GO:0006464	cellular protein modification process	7	297	0.00067	ENSGALP00000000170,ENSGALP00000003455,ENSGALP00000007707,ENSGALP00000012744,ENSGALP00000016689,ENSGALP00000019616,ENSGALP00000037183	CAMK2D,GNB2L1,LEPRE1,MAGT1,MYLK,PPIB,PPP2CB
GO:0030833	regulation of actin filament polymerization	3	20	0.00069	ENSGALP00000021028,ENSGALP00000039447,ENSGALP00000042167	HSPB1,MTPN,RDX
GO:0006139	nucleobase-containing compound metabolic process	9	553	0.00082	ENSGALP00000005565,ENSGALP00000005633,ENSGALP00000008849,ENSGALP00000009853,ENSGALP00000018742,ENSGALP00000024283,ENSGALP00000025165,ENSGALP00000041526,ENSGALP00000043256	ALDOC,CKB,HIST1H46,RBBP4,RPL7,RPS6,SRSF1,YARS,ZNF326
GO:0051716	cellular response to stimulus	9	560	0.00087	ENSGALP00000000170,ENSGALP00000011559,ENSGALP00000016629,ENSGALP00000016689,ENSGALP00000019616,ENSGALP00000023085,ENSGALP00000023626,ENSGALP00000025606,ENSGALP00000036002	ACTN4,CAMK2D,EEF1A1,GNB2L1,ITGB1,PPP2CB,PRDX1,RAB10,ZYX
GO:0051128	regulation of cellular component organization	6	219	0.00094	ENSGALP00000000170,ENSGALP00000014097,ENSGALP00000021028,ENSGALP00000039447,ENSGALP00000041744,ENSGALP00000042167	DSTN,GNB2L1,HSPB1,MTPN,RDX,SEC22B
GO:0016310	phosphorylation	5	136	0.001	ENSGALP00000013585,ENSGALP00000018742,ENSGALP00000019616,ENSGALP00000037183,ENSGALP00000043256	ALDOC,CAMK2D,CKB,CKMT1A,MYLK
GO:0048193	Golgi vesicle transport	3	24	0.001	ENSGALP00000012007,ENSGALP00000036002,ENSGALP00000041744	ARCN1,RAB10,SEC22B
GO:0010639	negative regulation of organelle organization	3	25	0.0011	ENSGALP00000021028,ENSGALP00000039447,ENSGALP00000041744	HSPB1,RDX,SEC22B
GO:1903202	negative regulation of oxidative stress-induced cell death	2	3	0.0011	ENSGALP00000000170,ENSGALP00000039447	GNB2L1,HSPB1
GO:0051171	regulation of nitrogen compound metabolic process	9	625	0.0016	ENSGALP00000000170,ENSGALP00000005565,ENSGALP00000007707,ENSGALP00000009853,ENSGALP00000016629,ENSGALP00000023085,ENSGALP00000039447,ENSGALP00000041744,ENSGALP00000042167	ACTN4,GNB2L1,HSPB1,LEPRE1,MTPN,PRDX1,RBBP4,SEC22B,ZNF326
GO:0051246	regulation of protein metabolic process	6	252	0.0017	ENSGALP00000000170,ENSGALP00000007707,ENSGALP00000016629,ENSGALP00000039447,ENSGALP00000041744,ENSGALP00000042167	GNB2L1,HSPB1,LEPRE1,MTPN,PRDX1,SEC22B
GO:0080090	regulation of primary metabolic process	9	634	0.0018	ENSGALP00000000170,ENSGALP00000005565,ENSGALP00000007707,ENSGALP00000009853,ENSGALP00000016629,ENSGALP00000023085,ENSGALP00000039447,ENSGALP00000041744,ENSGALP00000042167	ACTN4,GNB2L1,HSPB1,LEPRE1,MTPN,PRDX1,RBBP4,SEC22B,ZNF326
GO:0031323	regulation of cellular metabolic process	9	645	0.002	ENSGALP00000000170,ENSGALP00000005565,ENSGALP00000007707,ENSGALP00000009853,ENSGALP00000016629,ENSGALP00000023085,ENSGALP00000039447,ENSGALP00000041744,ENSGALP00000042167	ACTN4,GNB2L1,HSPB1,LEPRE1,MTPN,PRDX1,RBBP4,SEC22B,ZNF326
GO:0006396	RNA processing	4	95	0.0026	ENSGALP00000008849,ENSGALP00000009853,ENSGALP00000024283,ENSGALP00000025165	RPL7,RPS6,SRSF1,ZNF326
GO:0016070	RNA metabolic process	7	403	0.0029	ENSGALP00000005565,ENSGALP00000005633,ENSGALP00000008849,ENSGALP00000009853,ENSGALP00000024283,ENSGALP00000025165,ENSGALP00000041526	HIST1H46,RBBP4,RPL7,RPS6,SRSF1,YARS,ZNF326
GO:0009636	response to toxic substance	3	40	0.0032	ENSGALP00000016629,ENSGALP00000016689,ENSGALP00000037229	PON2,PPP2CB,PRDX1
GO:0048523	negative regulation of cellular process	7	414	0.0032	ENSGALP00000000170,ENSGALP00000003684,ENSGALP00000007707,ENSGALP00000021028,ENSGALP00000039447,ENSGALP00000041526,ENSGALP00000041744	GNB2L1,GPC1,HIST1H46,HSPB1,LEPRE1,RDX,SEC22B
GO:0051017	actin filament bundle assembly	2	7	0.0032	ENSGALP00000023626,ENSGALP00000031979	ACTN1,ZYX
GO:0055114	oxidation-reduction process	4	102	0.0032	ENSGALP00000003139,ENSGALP00000007707,ENSGALP00000016629,ENSGALP00000016630	AKR1A1,GLUD1,LEPRE1,PRDX1
GO:1901700	response to oxygen-containing compound	4	101	0.0032	ENSGALP00000000170,ENSGALP00000016629,ENSGALP00000016689,ENSGALP00000036002	GNB2L1,PPP2CB,PRDX1,RAB10
GO:0018208	peptidyl-proline modification	2	8	0.0038	ENSGALP00000003455,ENSGALP00000007707	LEPRE1,PPIB
GO:0007155	cell adhesion	4	109	0.004	ENSGALP00000011509,ENSGALP00000011559,ENSGALP00000023626,ENSGALP00000042596	COL6A2,ITGB1,TNC,ZYX
GO:0048522	positive regulation of cellular process	7	434	0.004	ENSGALP00000000170,ENSGALP00000003684,ENSGALP00000014097,ENSGALP00000023085,ENSGALP00000037183,ENSGALP00000039447,ENSGALP00000042167	ACTN4,DSTN,GNB2L1,GPC1,HSPB1,MTPN,MYLK
GO:0018193	peptidyl-amino acid modification	4	111	0.0041	ENSGALP00000003455,ENSGALP00000007707,ENSGALP00000012744,ENSGALP00000019616	CAMK2D,LEPRE1,MAGT1,PPIB
GO:0031400	negative regulation of protein modification process	3	46	0.0042	ENSGALP00000000170,ENSGALP00000007707,ENSGALP00000039447	GNB2L1,HSPB1,LEPRE1
GO:0007160	cell-matrix adhesion	2	9	0.0044	ENSGALP00000011559,ENSGALP00000023626	ITGB1,ZYX
GO:0051291	protein heterooligomerization	2	9	0.0044	ENSGALP00000041526,ENSGALP00000042596	COL6A2,HIST1H46
GO:0034660	ncRNA metabolic process	3	49	0.0048	ENSGALP00000005633,ENSGALP00000024283,ENSGALP00000025165	RPL7,RPS6,YARS
GO:0002449	lymphocyte mediated immunity	2	10	0.005	ENSGALP00000009505,ENSGALP00000016629	IGLL1,PRDX1
GO:0048583	regulation of response to stimulus	6	326	0.005	ENSGALP00000000170,ENSGALP00000003684,ENSGALP00000009505,ENSGALP00000016629,ENSGALP00000039447,ENSGALP00000042167	GNB2L1,GPC1,HSPB1,IGLL1,MTPN,PRDX1
GO:0051693	actin filament capping	2	10	0.005	ENSGALP00000021028,ENSGALP00000039447	HSPB1,RDX
GO:0080135	regulation of cellular response to stress	3	50	0.005	ENSGALP00000000170,ENSGALP00000016629,ENSGALP00000039447	GNB2L1,HSPB1,PRDX1
GO:2001242	regulation of intrinsic apoptotic signaling pathway	2	10	0.005	ENSGALP00000000170,ENSGALP00000039447	GNB2L1,HSPB1
GO:0006810	transport	6	331	0.0051	ENSGALP00000012007,ENSGALP00000023085,ENSGALP00000036002,ENSGALP00000038209,ENSGALP00000038523,ENSGALP00000041744	ACTN4,ARCN1,ATP2A2,ERP29,RAB10,SEC22B
GO:0070887	cellular response to chemical stimulus	5	216	0.0051	ENSGALP00000000170,ENSGALP00000016629,ENSGALP00000023626,ENSGALP00000025606,ENSGALP00000036002	EEF1A1,GNB2L1,PRDX1,RAB10,ZYX
GO:0007229	integrin-mediated signaling pathway	2	11	0.0055	ENSGALP00000011559,ENSGALP00000023626	ITGB1,ZYX
GO:0000302	response to reactive oxygen species	2	12	0.0063	ENSGALP00000016629,ENSGALP00000016689	PPP2CB,PRDX1
GO:0042593	glucose homeostasis	2	12	0.0063	ENSGALP00000000170,ENSGALP00000024283	GNB2L1,RPS6
GO:0071363	cellular response to growth factor stimulus	3	57	0.0063	ENSGALP00000000170,ENSGALP00000023626,ENSGALP00000025606	EEF1A1,GNB2L1,ZYX
GO:0022607	cellular component assembly	5	234	0.0065	ENSGALP00000005565,ENSGALP00000023626,ENSGALP00000031979,ENSGALP00000041526,ENSGALP00000042596	ACTN1,COL6A2,HIST1H46,RBBP4,ZYX
GO:0051239	regulation of multicellular organismal process	5	244	0.0077	ENSGALP00000000170,ENSGALP00000003684,ENSGALP00000039447,ENSGALP00000041526,ENSGALP00000042167	GNB2L1,GPC1,HIST1H46,HSPB1,MTPN
GO:0051247	positive regulation of protein metabolic process	4	141	0.0077	ENSGALP00000000170,ENSGALP00000039447,ENSGALP00000041744,ENSGALP00000042167	GNB2L1,HSPB1,MTPN,SEC22B
GO:0009306	protein secretion	2	15	0.0086	ENSGALP00000036002,ENSGALP00000038209	ERP29,RAB10
GO:0051240	positive regulation of multicellular organismal process	4	146	0.0086	ENSGALP00000000170,ENSGALP00000003684,ENSGALP00000039447,ENSGALP00000042167	GNB2L1,GPC1,HSPB1,MTPN
GO:0006754	ATP biosynthetic process	2	16	0.0093	ENSGALP00000018742,ENSGALP00000043256	ALDOC,CKB
GO:0045732	positive regulation of protein catabolic process	2	16	0.0093	ENSGALP00000000170,ENSGALP00000041744	GNB2L1,SEC22B
GO:0017144	drug metabolic process	3	68	0.0094	ENSGALP00000016629,ENSGALP00000018742,ENSGALP00000043256	ALDOC,CKB,PRDX1
GO:1901701	cellular response to oxygen-containing compound	3	68	0.0094	ENSGALP00000000170,ENSGALP00000016629,ENSGALP00000036002	GNB2L1,PRDX1,RAB10
GO:0051173	positive regulation of nitrogen compound metabolic process	5	275	0.0116	ENSGALP00000000170,ENSGALP00000023085,ENSGALP00000039447,ENSGALP00000041744,ENSGALP00000042167	ACTN4,GNB2L1,HSPB1,MTPN,SEC22B
GO:0006364	rRNA processing	2	19	0.0118	ENSGALP00000024283,ENSGALP00000025165	RPL7,RPS6
GO:0006936	muscle contraction	2	19	0.0118	ENSGALP00000005562,ENSGALP00000037183	MYLK,TPM1
GO:1901137	carbohydrate derivative biosynthetic process	3	77	0.0122	ENSGALP00000012744,ENSGALP00000018742,ENSGALP00000043256	ALDOC,CKB,MAGT1
GO:0031032	actomyosin structure organization	2	20	0.0126	ENSGALP00000023626,ENSGALP00000031979	ACTN1,ZYX
GO:0031399	regulation of protein modification process	4	168	0.0126	ENSGALP00000000170,ENSGALP00000007707,ENSGALP00000016629,ENSGALP00000039447	GNB2L1,HSPB1,LEPRE1,PRDX1
GO:0044281	small molecule metabolic process	4	168	0.0126	ENSGALP00000003139,ENSGALP00000005633,ENSGALP00000018742,ENSGALP00000043256	ALDOC,CKB,GLUD1,YARS
GO:0019752	carboxylic acid metabolic process	3	79	0.0128	ENSGALP00000003139,ENSGALP00000005633,ENSGALP00000043256	ALDOC,GLUD1,YARS
GO:0010604	positive regulation of macromolecule metabolic process	5	289	0.0134	ENSGALP00000000170,ENSGALP00000023085,ENSGALP00000039447,ENSGALP00000041744,ENSGALP00000042167	ACTN4,GNB2L1,HSPB1,MTPN,SEC22B
GO:0006469	negative regulation of protein kinase activity	2	22	0.0141	ENSGALP00000000170,ENSGALP00000039447	GNB2L1,HSPB1
GO:0071310	cellular response to organic substance	4	183	0.0157	ENSGALP00000000170,ENSGALP00000023626,ENSGALP00000025606,ENSGALP00000036002	EEF1A1,GNB2L1,RAB10,ZYX
GO:0032879	regulation of localization	4	187	0.0166	ENSGALP00000000170,ENSGALP00000007707,ENSGALP00000036002,ENSGALP00000037183	GNB2L1,LEPRE1,MYLK,RAB10
GO:0006955	immune response	3	90	0.0167	ENSGALP00000009505,ENSGALP00000016629,ENSGALP00000023626	IGLL1,PRDX1,ZYX
GO:0009168	purine ribonucleoside monophosphate biosynthetic process	2	25	0.017	ENSGALP00000018742,ENSGALP00000043256	ALDOC,CKB
GO:0010035	response to inorganic substance	2	27	0.0189	ENSGALP00000016629,ENSGALP00000016689	PPP2CB,PRDX1
GO:0031497	chromatin assembly	2	27	0.0189	ENSGALP00000005565,ENSGALP00000041526	HIST1H46,RBBP4
GO:0010556	regulation of macromolecule biosynthetic process	6	470	0.0192	ENSGALP00000000170,ENSGALP00000005565,ENSGALP00000009853,ENSGALP00000023085,ENSGALP00000039447,ENSGALP00000042167	ACTN4,GNB2L1,HSPB1,MTPN,RBBP4,ZNF326
GO:0046907	intracellular transport	3	97	0.0192	ENSGALP00000036002,ENSGALP00000038209,ENSGALP00000041744	ERP29,RAB10,SEC22B
GO:0031326	regulation of cellular biosynthetic process	6	486	0.0216	ENSGALP00000000170,ENSGALP00000005565,ENSGALP00000009853,ENSGALP00000023085,ENSGALP00000039447,ENSGALP00000042167	ACTN4,GNB2L1,HSPB1,MTPN,RBBP4,ZNF326
GO:0060627	regulation of vesicle-mediated transport	2	30	0.0216	ENSGALP00000000170,ENSGALP00000036002	GNB2L1,RAB10
GO:0007005	mitochondrion organization	2	31	0.0226	ENSGALP00000011291,ENSGALP00000016689	APOOL,PPP2CB
GO:0046034	ATP metabolic process	2	31	0.0226	ENSGALP00000018742,ENSGALP00000043256	ALDOC,CKB
GO:0006520	cellular amino acid metabolic process	2	33	0.0244	ENSGALP00000003139,ENSGALP00000005633	GLUD1,YARS
GO:0031324	negative regulation of cellular metabolic process	4	220	0.0246	ENSGALP00000000170,ENSGALP00000007707,ENSGALP00000039447,ENSGALP00000041744	GNB2L1,HSPB1,LEPRE1,SEC22B
GO:0016311	dephosphorylation	2	34	0.0254	ENSGALP00000016689,ENSGALP00000037229	PON2,PPP2CB
GO:0071495	cellular response to endogenous stimulus	3	115	0.0269	ENSGALP00000023626,ENSGALP00000025606,ENSGALP00000036002	EEF1A1,RAB10,ZYX
GO:1902532	negative regulation of intracellular signal transduction	2	36	0.0274	ENSGALP00000000170,ENSGALP00000039447	GNB2L1,HSPB1
GO:0030335	positive regulation of cell migration	2	37	0.0281	ENSGALP00000000170,ENSGALP00000037183	GNB2L1,MYLK
GO:0051049	regulation of transport	3	120	0.0288	ENSGALP00000000170,ENSGALP00000007707,ENSGALP00000036002	GNB2L1,LEPRE1,RAB10
GO:0051223	regulation of protein transport	2	39	0.0305	ENSGALP00000000170,ENSGALP00000007707	GNB2L1,LEPRE1
GO:0042592	homeostatic process	3	125	0.0314	ENSGALP00000000170,ENSGALP00000016629,ENSGALP00000024283	GNB2L1,PRDX1,RPS6
GO:0009167	purine ribonucleoside monophosphate metabolic process	2	41	0.0323	ENSGALP00000018742,ENSGALP00000043256	ALDOC,CKB
GO:0007165	signal transduction	5	391	0.0324	ENSGALP00000000170,ENSGALP00000011559,ENSGALP00000019616,ENSGALP00000023085,ENSGALP00000023626	ACTN4,CAMK2D,GNB2L1,ITGB1,ZYX
GO:0061024	membrane organization	2	42	0.0328	ENSGALP00000011291,ENSGALP00000041744	APOOL,SEC22B
GO:0001932	regulation of protein phosphorylation	3	130	0.033	ENSGALP00000000170,ENSGALP00000016629,ENSGALP00000039447	GNB2L1,HSPB1,PRDX1
GO:0044248	cellular catabolic process	3	131	0.0336	ENSGALP00000016629,ENSGALP00000016689,ENSGALP00000043256	ALDOC,PPP2CB,PRDX1
GO:0001558	regulation of cell growth	2	44	0.0348	ENSGALP00000000170,ENSGALP00000042167	GNB2L1,MTPN
GO:0051186	cofactor metabolic process	2	44	0.0348	ENSGALP00000016629,ENSGALP00000043256	ALDOC,PRDX1
GO:0009966	regulation of signal transduction	4	265	0.038	ENSGALP00000000170,ENSGALP00000003684,ENSGALP00000016629,ENSGALP00000039447	GNB2L1,GPC1,HSPB1,PRDX1
GO:0008380	RNA splicing	2	48	0.0391	ENSGALP00000008849,ENSGALP00000009853	SRSF1,ZNF326
GO:1902531	regulation of intracellular signal transduction	3	143	0.0397	ENSGALP00000000170,ENSGALP00000016629,ENSGALP00000039447	GNB2L1,HSPB1,PRDX1
GO:1903530	regulation of secretion by cell	2	49	0.0402	ENSGALP00000007707,ENSGALP00000036002	LEPRE1,RAB10
GO:0031329	regulation of cellular catabolic process	2	51	0.0426	ENSGALP00000000170,ENSGALP00000041744	GNB2L1,SEC22B
GO:0045087	innate immune response	2	52	0.0436	ENSGALP00000016629,ENSGALP00000023626	PRDX1,ZYX
GO:0006397	mRNA processing	2	56	0.049	ENSGALP00000008849,ENSGALP00000009853	SRSF1,ZNF326

## Sheet: GO CF-down DOH
Gene Ontology Terms with downregulated proteins in CF treatment at Day of hatch (DOH)
#term ID	term description	observed gene count	background gene count	false discovery rate	matching proteins in your network (IDs)	matching proteins in your network (labels)
GO:0009987	cellular process	45	1590	6.21e-28	ENSGALP00000000497,ENSGALP00000000693,ENSGALP00000001013,ENSGALP00000001456,ENSGALP00000001957,ENSGALP00000003130,ENSGALP00000004164,ENSGALP00000004265,ENSGALP00000005126,ENSGALP00000005212,ENSGALP00000006762,ENSGALP00000007526,ENSGALP00000008112,ENSGALP00000010520,ENSGALP00000010754,ENSGALP00000012019,ENSGALP00000012298,ENSGALP00000013122,ENSGALP00000014280,ENSGALP00000014747,ENSGALP00000016173,…	ACP1,ANP32E,AP3M1,ATP1A1,BLMH,BZW2,CA2,CCT8,CPSF6,CYCS,DDX1,DPYSL2,EFTUD2,EIF2S3,GART,GSTA,HDAC1,HIST1H2B5,HMGB3,HNRNPDL,HSPD1,LDHB,MAGOH2,MAPRE1,MYH11,MYH9,MYO1A,MYO1C,NME2,PLS1,PRPF19,RAB11A,RAB18,RPL22,RPS6KA1,SDHB,SEC23B,SMU1,SRRM1,SUB1,TAGLN,TPI1,TTR,TUBB2B,YWHAZ
GO:0008152	metabolic process	29	1070	5.93e-15	ENSGALP00000000497,ENSGALP00000000693,ENSGALP00000001013,ENSGALP00000001456,ENSGALP00000001957,ENSGALP00000003130,ENSGALP00000005126,ENSGALP00000005212,ENSGALP00000006762,ENSGALP00000013122,ENSGALP00000014747,ENSGALP00000016173,ENSGALP00000017367,ENSGALP00000017934,ENSGALP00000019979,ENSGALP00000020445,ENSGALP00000022250,ENSGALP00000022525,ENSGALP00000023396,ENSGALP00000024388,ENSGALP00000026289,…	ACP1,ADH1C,APOB,BLMH,CPSF6,CYB5A,CYCS,DDX1,EFTUD2,EIF2S3,GART,GSTA,HDAC1,HMGB3,HNRNPDL,HSPD1,LDHB,MAGOH2,MYH9,NME2,PRPF19,RPL22,RPS6KA1,SDHB,SMU1,SRRM1,SUB1,TPI1,TTR
GO:0006810	transport	19	331	1.71e-14	ENSGALP00000002373,ENSGALP00000002839,ENSGALP00000004164,ENSGALP00000004355,ENSGALP00000007526,ENSGALP00000008112,ENSGALP00000012019,ENSGALP00000012298,ENSGALP00000013122,ENSGALP00000014280,ENSGALP00000017367,ENSGALP00000020445,ENSGALP00000021907,ENSGALP00000024150,ENSGALP00000024388,ENSGALP00000024537,ENSGALP00000026550,ENSGALP00000028746,ENSGALP00000041556	ANP32E,AP3M1,APOB,ATP1A1,ATP1B1,ATP1B3,ATP2A3,HSPD1,MAGOH2,MYH9,MYO1A,PLS1,RAB11A,RAB18,SEC23B,SEC31A,TTR,XPO7,YWHAZ
GO:0051179	localization	20	423	4.69e-14	ENSGALP00000002373,ENSGALP00000002839,ENSGALP00000004164,ENSGALP00000004355,ENSGALP00000007526,ENSGALP00000008112,ENSGALP00000010754,ENSGALP00000012019,ENSGALP00000012298,ENSGALP00000013122,ENSGALP00000014280,ENSGALP00000017367,ENSGALP00000020445,ENSGALP00000021907,ENSGALP00000024150,ENSGALP00000024388,ENSGALP00000024537,ENSGALP00000026550,ENSGALP00000028746,ENSGALP00000041556	ANP32E,AP3M1,APOB,ATP1A1,ATP1B1,ATP1B3,ATP2A3,HSPD1,MAGOH2,MAPRE1,MYH9,MYO1A,PLS1,RAB11A,RAB18,SEC23B,SEC31A,TTR,XPO7,YWHAZ
GO:0071704	organic substance metabolic process	27	1008	5.58e-14	ENSGALP00000000497,ENSGALP00000000693,ENSGALP00000001013,ENSGALP00000001456,ENSGALP00000001957,ENSGALP00000003130,ENSGALP00000005126,ENSGALP00000005212,ENSGALP00000006762,ENSGALP00000013122,ENSGALP00000014747,ENSGALP00000016173,ENSGALP00000017367,ENSGALP00000017934,ENSGALP00000020445,ENSGALP00000022525,ENSGALP00000023396,ENSGALP00000024388,ENSGALP00000026289,ENSGALP00000026307,ENSGALP00000026345,…	ACP1,APOB,BLMH,CPSF6,CYCS,DDX1,EFTUD2,EIF2S3,GART,GSTA,HDAC1,HMGB3,HNRNPDL,HSPD1,LDHB,MAGOH2,MYH9,NME2,PRPF19,RPL22,RPS6KA1,SDHB,SMU1,SRRM1,SUB1,TPI1,TTR
GO:0044238	primary metabolic process	26	971	2.12e-13	ENSGALP00000000497,ENSGALP00000000693,ENSGALP00000001013,ENSGALP00000001456,ENSGALP00000001957,ENSGALP00000003130,ENSGALP00000005126,ENSGALP00000005212,ENSGALP00000006762,ENSGALP00000013122,ENSGALP00000014747,ENSGALP00000016173,ENSGALP00000017367,ENSGALP00000017934,ENSGALP00000020445,ENSGALP00000022525,ENSGALP00000023396,ENSGALP00000024388,ENSGALP00000026307,ENSGALP00000026345,ENSGALP00000026509,…	ACP1,APOB,BLMH,CPSF6,CYCS,DDX1,EFTUD2,EIF2S3,GART,HDAC1,HMGB3,HNRNPDL,HSPD1,LDHB,MAGOH2,MYH9,NME2,PRPF19,RPL22,RPS6KA1,SDHB,SMU1,SRRM1,SUB1,TPI1,TTR
GO:0044237	cellular metabolic process	25	988	2.82e-12	ENSGALP00000000497,ENSGALP00000000693,ENSGALP00000001013,ENSGALP00000001456,ENSGALP00000001957,ENSGALP00000003130,ENSGALP00000005126,ENSGALP00000005212,ENSGALP00000006762,ENSGALP00000013122,ENSGALP00000014747,ENSGALP00000016173,ENSGALP00000017367,ENSGALP00000017934,ENSGALP00000022525,ENSGALP00000023396,ENSGALP00000024388,ENSGALP00000026289,ENSGALP00000026307,ENSGALP00000026345,ENSGALP00000026509,…	ACP1,BLMH,CPSF6,CYCS,DDX1,EFTUD2,EIF2S3,GART,GSTA,HDAC1,HMGB3,HNRNPDL,HSPD1,LDHB,MAGOH2,NME2,PRPF19,RPL22,RPS6KA1,SDHB,SMU1,SRRM1,SUB1,TPI1,TTR
GO:0006807	nitrogen compound metabolic process	23	930	6.26e-11	ENSGALP00000000497,ENSGALP00000001013,ENSGALP00000001456,ENSGALP00000001957,ENSGALP00000003130,ENSGALP00000005126,ENSGALP00000005212,ENSGALP00000006762,ENSGALP00000013122,ENSGALP00000014747,ENSGALP00000016173,ENSGALP00000017367,ENSGALP00000017934,ENSGALP00000020445,ENSGALP00000022525,ENSGALP00000023396,ENSGALP00000026289,ENSGALP00000026307,ENSGALP00000026345,ENSGALP00000026509,ENSGALP00000034078,…	ACP1,BLMH,CPSF6,CYCS,DDX1,EFTUD2,EIF2S3,GART,GSTA,HDAC1,HMGB3,HNRNPDL,HSPD1,MAGOH2,MYH9,NME2,PRPF19,RPL22,RPS6KA1,SMU1,SRRM1,SUB1,TPI1
GO:0016043	cellular component organization	18	526	1.96e-10	ENSGALP00000004164,ENSGALP00000005212,ENSGALP00000010520,ENSGALP00000012019,ENSGALP00000012298,ENSGALP00000013122,ENSGALP00000014280,ENSGALP00000014747,ENSGALP00000016173,ENSGALP00000020445,ENSGALP00000020884,ENSGALP00000021907,ENSGALP00000022525,ENSGALP00000024388,ENSGALP00000026509,ENSGALP00000028746,ENSGALP00000030864,ENSGALP00000037260	ANP32E,CPSF6,DDX1,DPYSL2,HDAC1,HIST1H2B5,HMGB3,HSPD1,MYH11,MYH9,PLS1,PRPF19,RAB11A,RAB18,SEC23B,TTR,TUBB2B,YWHAZ
GO:0034641	cellular nitrogen compound metabolic process	19	630	3.26e-10	ENSGALP00000001013,ENSGALP00000001456,ENSGALP00000001957,ENSGALP00000003130,ENSGALP00000005126,ENSGALP00000005212,ENSGALP00000013122,ENSGALP00000014747,ENSGALP00000016173,ENSGALP00000017367,ENSGALP00000017934,ENSGALP00000022525,ENSGALP00000023396,ENSGALP00000026289,ENSGALP00000026307,ENSGALP00000026509,ENSGALP00000034078,ENSGALP00000035973,ENSGALP00000037222	CPSF6,CYCS,DDX1,EFTUD2,EIF2S3,GART,GSTA,HDAC1,HMGB3,HNRNPDL,HSPD1,MAGOH2,NME2,PRPF19,RPL22,SMU1,SRRM1,SUB1,TPI1
GO:0071702	organic substance transport	12	165	3.26e-10	ENSGALP00000002839,ENSGALP00000004164,ENSGALP00000008112,ENSGALP00000012019,ENSGALP00000012298,ENSGALP00000013122,ENSGALP00000014280,ENSGALP00000017367,ENSGALP00000020445,ENSGALP00000026550,ENSGALP00000028746,ENSGALP00000041556	AP3M1,APOB,HSPD1,MAGOH2,MYH9,PLS1,RAB11A,RAB18,SEC23B,SEC31A,XPO7,YWHAZ
GO:0006996	organelle organization	15	345	5.19e-10	ENSGALP00000004164,ENSGALP00000005212,ENSGALP00000010520,ENSGALP00000012019,ENSGALP00000012298,ENSGALP00000013122,ENSGALP00000014280,ENSGALP00000014747,ENSGALP00000020445,ENSGALP00000020884,ENSGALP00000021907,ENSGALP00000026509,ENSGALP00000028746,ENSGALP00000030864,ENSGALP00000037260	ANP32E,DDX1,DPYSL2,HDAC1,HIST1H2B5,HMGB3,HSPD1,MYH11,MYH9,PLS1,RAB11A,RAB18,SEC23B,TUBB2B,YWHAZ
GO:0033036	macromolecule localization	12	181	7.58e-10	ENSGALP00000002839,ENSGALP00000008112,ENSGALP00000010754,ENSGALP00000012019,ENSGALP00000012298,ENSGALP00000013122,ENSGALP00000014280,ENSGALP00000017367,ENSGALP00000020445,ENSGALP00000026550,ENSGALP00000028746,ENSGALP00000041556	AP3M1,APOB,HSPD1,MAGOH2,MAPRE1,MYH9,RAB11A,RAB18,SEC23B,SEC31A,XPO7,YWHAZ
GO:1901360	organic cyclic compound metabolic process	17	594	8.6e-09	ENSGALP00000001456,ENSGALP00000001957,ENSGALP00000003130,ENSGALP00000005126,ENSGALP00000005212,ENSGALP00000013122,ENSGALP00000014747,ENSGALP00000016173,ENSGALP00000017367,ENSGALP00000017934,ENSGALP00000022525,ENSGALP00000023396,ENSGALP00000026509,ENSGALP00000026550,ENSGALP00000034078,ENSGALP00000035973,ENSGALP00000037222	APOB,CPSF6,CYCS,DDX1,EFTUD2,GART,HDAC1,HMGB3,HNRNPDL,HSPD1,MAGOH2,NME2,PRPF19,SMU1,SRRM1,SUB1,TPI1
GO:0071705	nitrogen compound transport	10	136	1.56e-08	ENSGALP00000002839,ENSGALP00000008112,ENSGALP00000012019,ENSGALP00000012298,ENSGALP00000013122,ENSGALP00000014280,ENSGALP00000017367,ENSGALP00000020445,ENSGALP00000028746,ENSGALP00000041556	AP3M1,HSPD1,MAGOH2,MYH9,RAB11A,RAB18,SEC23B,SEC31A,XPO7,YWHAZ
GO:0046907	intracellular transport	9	97	1.8e-08	ENSGALP00000002839,ENSGALP00000007526,ENSGALP00000008112,ENSGALP00000012019,ENSGALP00000012298,ENSGALP00000013122,ENSGALP00000014280,ENSGALP00000021907,ENSGALP00000028746	ANP32E,AP3M1,HSPD1,MYO1A,RAB11A,RAB18,SEC23B,XPO7,YWHAZ
GO:0006139	nucleobase-containing compound metabolic process	16	553	2.41e-08	ENSGALP00000001456,ENSGALP00000001957,ENSGALP00000003130,ENSGALP00000005126,ENSGALP00000005212,ENSGALP00000013122,ENSGALP00000014747,ENSGALP00000016173,ENSGALP00000017367,ENSGALP00000017934,ENSGALP00000022525,ENSGALP00000023396,ENSGALP00000026509,ENSGALP00000034078,ENSGALP00000035973,ENSGALP00000037222	CPSF6,CYCS,DDX1,EFTUD2,GART,HDAC1,HMGB3,HNRNPDL,HSPD1,MAGOH2,NME2,PRPF19,SMU1,SRRM1,SUB1,TPI1
GO:0008104	protein localization	10	150	3.18e-08	ENSGALP00000002839,ENSGALP00000008112,ENSGALP00000010754,ENSGALP00000012019,ENSGALP00000012298,ENSGALP00000013122,ENSGALP00000014280,ENSGALP00000020445,ENSGALP00000028746,ENSGALP00000041556	AP3M1,HSPD1,MAPRE1,MYH9,RAB11A,RAB18,SEC23B,SEC31A,XPO7,YWHAZ
GO:0015031	protein transport	9	110	3.99e-08	ENSGALP00000002839,ENSGALP00000008112,ENSGALP00000012019,ENSGALP00000012298,ENSGALP00000013122,ENSGALP00000014280,ENSGALP00000020445,ENSGALP00000028746,ENSGALP00000041556	AP3M1,HSPD1,MYH9,RAB11A,RAB18,SEC23B,SEC31A,XPO7,YWHAZ
GO:0051641	cellular localization	10	163	4.99e-08	ENSGALP00000002839,ENSGALP00000007526,ENSGALP00000008112,ENSGALP00000010754,ENSGALP00000012019,ENSGALP00000012298,ENSGALP00000013122,ENSGALP00000014280,ENSGALP00000021907,ENSGALP00000028746	ANP32E,AP3M1,HSPD1,MAPRE1,MYO1A,RAB11A,RAB18,SEC23B,XPO7,YWHAZ
GO:0043170	macromolecule metabolic process	18	825	8.64e-08	ENSGALP00000000497,ENSGALP00000001013,ENSGALP00000001456,ENSGALP00000001957,ENSGALP00000003130,ENSGALP00000005126,ENSGALP00000005212,ENSGALP00000006762,ENSGALP00000013122,ENSGALP00000014747,ENSGALP00000016173,ENSGALP00000017367,ENSGALP00000020445,ENSGALP00000022525,ENSGALP00000026307,ENSGALP00000026345,ENSGALP00000026509,ENSGALP00000037222	ACP1,BLMH,CPSF6,DDX1,EFTUD2,EIF2S3,HDAC1,HMGB3,HNRNPDL,HSPD1,MAGOH2,MYH9,PRPF19,RPL22,RPS6KA1,SMU1,SRRM1,SUB1
GO:0050794	regulation of cellular process	20	1051	8.72e-08	ENSGALP00000000497,ENSGALP00000003130,ENSGALP00000004164,ENSGALP00000005126,ENSGALP00000005212,ENSGALP00000010754,ENSGALP00000012298,ENSGALP00000013122,ENSGALP00000014747,ENSGALP00000016173,ENSGALP00000017934,ENSGALP00000020445,ENSGALP00000020884,ENSGALP00000021907,ENSGALP00000024388,ENSGALP00000026509,ENSGALP00000028746,ENSGALP00000030864,ENSGALP00000034078,ENSGALP00000037222	ANP32E,CPSF6,CYCS,DDX1,DPYSL2,HDAC1,HMGB3,HNRNPDL,HSPD1,MAPRE1,MYH9,NME2,PLS1,RAB11A,RPS6KA1,SMU1,SUB1,TTR,TUBB2B,YWHAZ
GO:0022607	cellular component assembly	11	234	9.17e-08	ENSGALP00000004164,ENSGALP00000010520,ENSGALP00000012298,ENSGALP00000014280,ENSGALP00000016173,ENSGALP00000020445,ENSGALP00000021907,ENSGALP00000022525,ENSGALP00000024388,ENSGALP00000028746,ENSGALP00000037260	ANP32E,CPSF6,HIST1H2B5,MYH11,MYH9,PLS1,PRPF19,RAB11A,SEC23B,TTR,YWHAZ
GO:0006397	mRNA processing	7	56	1.58e-07	ENSGALP00000001456,ENSGALP00000001957,ENSGALP00000003130,ENSGALP00000016173,ENSGALP00000017367,ENSGALP00000022525,ENSGALP00000026509	CPSF6,DDX1,EFTUD2,MAGOH2,PRPF19,SMU1,SRRM1
GO:0007017	microtubule-based process	7	61	2.49e-07	ENSGALP00000004265,ENSGALP00000007526,ENSGALP00000008112,ENSGALP00000010520,ENSGALP00000012298,ENSGALP00000020445,ENSGALP00000020884	AP3M1,MYH11,MYH9,MYO1A,MYO1C,RAB11A,TUBB2B
GO:0010467	gene expression	13	440	5.35e-07	ENSGALP00000001013,ENSGALP00000001456,ENSGALP00000001957,ENSGALP00000003130,ENSGALP00000005126,ENSGALP00000005212,ENSGALP00000014747,ENSGALP00000016173,ENSGALP00000017367,ENSGALP00000022525,ENSGALP00000026307,ENSGALP00000026509,ENSGALP00000037222	CPSF6,DDX1,EFTUD2,EIF2S3,HDAC1,HMGB3,HNRNPDL,MAGOH2,PRPF19,RPL22,SMU1,SRRM1,SUB1
GO:0044281	small molecule metabolic process	9	168	7.77e-07	ENSGALP00000000693,ENSGALP00000006762,ENSGALP00000017934,ENSGALP00000023396,ENSGALP00000024388,ENSGALP00000026550,ENSGALP00000034078,ENSGALP00000035973,ENSGALP00000041792	APOB,BLMH,CYCS,GART,LDHB,NME2,SDHB,TPI1,TTR
GO:0008380	RNA splicing	6	48	1.68e-06	ENSGALP00000001456,ENSGALP00000001957,ENSGALP00000003130,ENSGALP00000017367,ENSGALP00000022525,ENSGALP00000026509	DDX1,EFTUD2,MAGOH2,PRPF19,SMU1,SRRM1
GO:0007018	microtubule-based movement	5	26	3.15e-06	ENSGALP00000004265,ENSGALP00000007526,ENSGALP00000008112,ENSGALP00000010520,ENSGALP00000020445	AP3M1,MYH11,MYH9,MYO1A,MYO1C
GO:0034613	cellular protein localization	7	95	3.55e-06	ENSGALP00000002839,ENSGALP00000008112,ENSGALP00000010754,ENSGALP00000012298,ENSGALP00000013122,ENSGALP00000014280,ENSGALP00000028746	AP3M1,HSPD1,MAPRE1,RAB11A,SEC23B,XPO7,YWHAZ
GO:0065003	protein-containing complex assembly	8	148	3.9e-06	ENSGALP00000010520,ENSGALP00000014280,ENSGALP00000016173,ENSGALP00000020445,ENSGALP00000021907,ENSGALP00000022525,ENSGALP00000024388,ENSGALP00000037260	ANP32E,CPSF6,HIST1H2B5,MYH11,MYH9,PRPF19,SEC23B,TTR
GO:1901564	organonitrogen compound metabolic process	13	534	3.9e-06	ENSGALP00000000497,ENSGALP00000001013,ENSGALP00000005212,ENSGALP00000006762,ENSGALP00000017934,ENSGALP00000020445,ENSGALP00000022525,ENSGALP00000023396,ENSGALP00000026289,ENSGALP00000026307,ENSGALP00000026345,ENSGALP00000034078,ENSGALP00000035973	ACP1,BLMH,CYCS,EIF2S3,GART,GSTA,HDAC1,MYH9,NME2,PRPF19,RPL22,RPS6KA1,TPI1
GO:0034622	cellular protein-containing complex assembly	7	110	8.14e-06	ENSGALP00000010520,ENSGALP00000014280,ENSGALP00000016173,ENSGALP00000020445,ENSGALP00000021907,ENSGALP00000022525,ENSGALP00000037260	ANP32E,CPSF6,HIST1H2B5,MYH11,MYH9,PRPF19,SEC23B
GO:0090304	nucleic acid metabolic process	12	486	1.02e-05	ENSGALP00000001456,ENSGALP00000001957,ENSGALP00000003130,ENSGALP00000005126,ENSGALP00000005212,ENSGALP00000013122,ENSGALP00000014747,ENSGALP00000016173,ENSGALP00000017367,ENSGALP00000022525,ENSGALP00000026509,ENSGALP00000037222	CPSF6,DDX1,EFTUD2,HDAC1,HMGB3,HNRNPDL,HSPD1,MAGOH2,PRPF19,SMU1,SRRM1,SUB1
GO:0016070	RNA metabolic process	11	403	1.2e-05	ENSGALP00000001456,ENSGALP00000001957,ENSGALP00000003130,ENSGALP00000005126,ENSGALP00000005212,ENSGALP00000014747,ENSGALP00000016173,ENSGALP00000017367,ENSGALP00000022525,ENSGALP00000026509,ENSGALP00000037222	CPSF6,DDX1,EFTUD2,HDAC1,HMGB3,HNRNPDL,MAGOH2,PRPF19,SMU1,SRRM1,SUB1
GO:0006886	intracellular protein transport	5	47	3.63e-05	ENSGALP00000002839,ENSGALP00000008112,ENSGALP00000013122,ENSGALP00000014280,ENSGALP00000028746	AP3M1,HSPD1,SEC23B,XPO7,YWHAZ
GO:0044271	cellular nitrogen compound biosynthetic process	10	431	0.00016	ENSGALP00000001013,ENSGALP00000005126,ENSGALP00000005212,ENSGALP00000014747,ENSGALP00000023396,ENSGALP00000026307,ENSGALP00000026509,ENSGALP00000034078,ENSGALP00000035973,ENSGALP00000037222	DDX1,EIF2S3,GART,HDAC1,HMGB3,HNRNPDL,NME2,RPL22,SUB1,TPI1
GO:0006928	movement of cell or subcellular component	6	118	0.00017	ENSGALP00000004265,ENSGALP00000007526,ENSGALP00000008112,ENSGALP00000010520,ENSGALP00000020445,ENSGALP00000030864	AP3M1,DPYSL2,MYH11,MYH9,MYO1A,MYO1C
GO:0007010	cytoskeleton organization	6	117	0.00017	ENSGALP00000004164,ENSGALP00000010520,ENSGALP00000012298,ENSGALP00000020445,ENSGALP00000020884,ENSGALP00000030864	DPYSL2,MYH11,MYH9,PLS1,RAB11A,TUBB2B
GO:0010941	regulation of cell death	6	141	0.00045	ENSGALP00000000497,ENSGALP00000013122,ENSGALP00000017934,ENSGALP00000021907,ENSGALP00000028746,ENSGALP00000034078	ANP32E,CYCS,HSPD1,NME2,RPS6KA1,YWHAZ
GO:0051276	chromosome organization	6	144	0.00049	ENSGALP00000005212,ENSGALP00000012298,ENSGALP00000014747,ENSGALP00000021907,ENSGALP00000026509,ENSGALP00000037260	ANP32E,DDX1,HDAC1,HIST1H2B5,HMGB3,RAB11A
GO:0051128	regulation of cellular component organization	7	219	0.00052	ENSGALP00000004164,ENSGALP00000005126,ENSGALP00000010754,ENSGALP00000012298,ENSGALP00000020445,ENSGALP00000020884,ENSGALP00000030864	DPYSL2,MAPRE1,MYH9,PLS1,RAB11A,SUB1,TUBB2B
GO:0006814	sodium ion transport	3	13	0.00054	ENSGALP00000004355,ENSGALP00000024150,ENSGALP00000024537	ATP1A1,ATP1B1,ATP1B3
GO:0016192	vesicle-mediated transport	5	92	0.00068	ENSGALP00000007526,ENSGALP00000008112,ENSGALP00000012298,ENSGALP00000014280,ENSGALP00000041556	AP3M1,MYO1A,RAB11A,SEC23B,SEC31A
GO:0071103	DNA conformation change	4	47	0.0008	ENSGALP00000014747,ENSGALP00000021907,ENSGALP00000026509,ENSGALP00000037260	ANP32E,DDX1,HIST1H2B5,HMGB3
GO:0009150	purine ribonucleotide metabolic process	4	49	0.00092	ENSGALP00000017934,ENSGALP00000023396,ENSGALP00000034078,ENSGALP00000035973	CYCS,GART,NME2,TPI1
GO:0055114	oxidation-reduction process	5	102	0.001	ENSGALP00000000693,ENSGALP00000017934,ENSGALP00000019979,ENSGALP00000022250,ENSGALP00000041792	ADH1C,CYB5A,CYCS,LDHB,SDHB
GO:0043281	regulation of cysteine-type endopeptidase activity involved in apoptotic process	3	18	0.0011	ENSGALP00000000497,ENSGALP00000013122,ENSGALP00000017934	CYCS,HSPD1,RPS6KA1
GO:1901576	organic substance biosynthetic process	10	556	0.0011	ENSGALP00000001013,ENSGALP00000005126,ENSGALP00000005212,ENSGALP00000014747,ENSGALP00000023396,ENSGALP00000026307,ENSGALP00000026509,ENSGALP00000034078,ENSGALP00000035973,ENSGALP00000037222	DDX1,EIF2S3,GART,HDAC1,HMGB3,HNRNPDL,NME2,RPL22,SUB1,TPI1
GO:0006813	potassium ion transport	3	20	0.0013	ENSGALP00000004355,ENSGALP00000024150,ENSGALP00000024537	ATP1A1,ATP1B1,ATP1B3
GO:0034654	nucleobase-containing compound biosynthetic process	8	357	0.0013	ENSGALP00000005126,ENSGALP00000005212,ENSGALP00000014747,ENSGALP00000023396,ENSGALP00000026509,ENSGALP00000034078,ENSGALP00000035973,ENSGALP00000037222	DDX1,GART,HDAC1,HMGB3,HNRNPDL,NME2,SUB1,TPI1
GO:0030029	actin filament-based process	4	62	0.0017	ENSGALP00000004164,ENSGALP00000007526,ENSGALP00000010520,ENSGALP00000020445	MYH11,MYH9,MYO1A,PLS1
GO:0044260	cellular macromolecule metabolic process	11	721	0.0017	ENSGALP00000000497,ENSGALP00000001013,ENSGALP00000005126,ENSGALP00000005212,ENSGALP00000013122,ENSGALP00000014747,ENSGALP00000022525,ENSGALP00000026307,ENSGALP00000026345,ENSGALP00000026509,ENSGALP00000037222	ACP1,DDX1,EIF2S3,HDAC1,HMGB3,HNRNPDL,HSPD1,PRPF19,RPL22,RPS6KA1,SUB1
GO:0030001	metal ion transport	4	63	0.0018	ENSGALP00000002373,ENSGALP00000004355,ENSGALP00000024150,ENSGALP00000024537	ATP1A1,ATP1B1,ATP1B3,ATP2A3
GO:0006913	nucleocytoplasmic transport	3	25	0.0022	ENSGALP00000002839,ENSGALP00000012019,ENSGALP00000021907	ANP32E,RAB18,XPO7
GO:0042981	regulation of apoptotic process	5	129	0.0022	ENSGALP00000000497,ENSGALP00000013122,ENSGALP00000017934,ENSGALP00000021907,ENSGALP00000034078	ANP32E,CYCS,HSPD1,NME2,RPS6KA1
GO:0051171	regulation of nitrogen compound metabolic process	10	625	0.0022	ENSGALP00000000497,ENSGALP00000003130,ENSGALP00000005126,ENSGALP00000005212,ENSGALP00000013122,ENSGALP00000014747,ENSGALP00000016173,ENSGALP00000017934,ENSGALP00000026509,ENSGALP00000037222	CPSF6,CYCS,DDX1,HDAC1,HMGB3,HNRNPDL,HSPD1,RPS6KA1,SMU1,SUB1
GO:0080090	regulation of primary metabolic process	10	634	0.0024	ENSGALP00000000497,ENSGALP00000003130,ENSGALP00000005126,ENSGALP00000005212,ENSGALP00000013122,ENSGALP00000014747,ENSGALP00000016173,ENSGALP00000017934,ENSGALP00000026509,ENSGALP00000037222	CPSF6,CYCS,DDX1,HDAC1,HMGB3,HNRNPDL,HSPD1,RPS6KA1,SMU1,SUB1
GO:0009409	response to cold	2	4	0.0026	ENSGALP00000013122,ENSGALP00000019120	HSPA2,HSPD1
GO:0019538	protein metabolic process	8	412	0.0026	ENSGALP00000000497,ENSGALP00000001013,ENSGALP00000005212,ENSGALP00000006762,ENSGALP00000020445,ENSGALP00000022525,ENSGALP00000026307,ENSGALP00000026345	ACP1,BLMH,EIF2S3,HDAC1,MYH9,PRPF19,RPL22,RPS6KA1
GO:0031115	negative regulation of microtubule polymerization	2	4	0.0026	ENSGALP00000010754,ENSGALP00000020884	MAPRE1,TUBB2B
GO:0031323	regulation of cellular metabolic process	10	645	0.0026	ENSGALP00000000497,ENSGALP00000003130,ENSGALP00000005126,ENSGALP00000005212,ENSGALP00000013122,ENSGALP00000014747,ENSGALP00000016173,ENSGALP00000017934,ENSGALP00000026509,ENSGALP00000037222	CPSF6,CYCS,DDX1,HDAC1,HMGB3,HNRNPDL,HSPD1,RPS6KA1,SMU1,SUB1
GO:0060255	regulation of macromolecule metabolic process	10	645	0.0026	ENSGALP00000000497,ENSGALP00000003130,ENSGALP00000005126,ENSGALP00000005212,ENSGALP00000013122,ENSGALP00000014747,ENSGALP00000016173,ENSGALP00000017934,ENSGALP00000026509,ENSGALP00000037222	CPSF6,CYCS,DDX1,HDAC1,HMGB3,HNRNPDL,HSPD1,RPS6KA1,SMU1,SUB1
GO:0006796	phosphate-containing compound metabolic process	6	218	0.0027	ENSGALP00000000497,ENSGALP00000017934,ENSGALP00000023396,ENSGALP00000026345,ENSGALP00000034078,ENSGALP00000035973	ACP1,CYCS,GART,NME2,RPS6KA1,TPI1
GO:0009152	purine ribonucleotide biosynthetic process	3	29	0.0027	ENSGALP00000023396,ENSGALP00000034078,ENSGALP00000035973	GART,NME2,TPI1
GO:0006066	alcohol metabolic process	3	32	0.0032	ENSGALP00000023396,ENSGALP00000024388,ENSGALP00000026550	APOB,TPI1,TTR
GO:0006458	'de novo' protein folding	2	5	0.0032	ENSGALP00000013122,ENSGALP00000025461	CCT8,HSPD1
GO:0010256	endomembrane system organization	3	31	0.0032	ENSGALP00000012019,ENSGALP00000012298,ENSGALP00000028746	RAB11A,RAB18,YWHAZ
GO:0019752	carboxylic acid metabolic process	4	79	0.0032	ENSGALP00000000693,ENSGALP00000006762,ENSGALP00000023396,ENSGALP00000041792	BLMH,LDHB,SDHB,TPI1
GO:0031034	myosin filament assembly	2	5	0.0032	ENSGALP00000010520,ENSGALP00000020445	MYH11,MYH9
GO:0050793	regulation of developmental process	6	231	0.0032	ENSGALP00000004164,ENSGALP00000012298,ENSGALP00000014747,ENSGALP00000020445,ENSGALP00000030864,ENSGALP00000034078	DPYSL2,HMGB3,MYH9,NME2,PLS1,RAB11A
GO:0006091	generation of precursor metabolites and energy	3	34	0.0036	ENSGALP00000000693,ENSGALP00000017934,ENSGALP00000023396	CYCS,SDHB,TPI1
GO:0030048	actin filament-based movement	2	6	0.0036	ENSGALP00000007526,ENSGALP00000020445	MYH9,MYO1A
GO:0048638	regulation of developmental growth	3	34	0.0036	ENSGALP00000004164,ENSGALP00000012298,ENSGALP00000030864	DPYSL2,PLS1,RAB11A
GO:0048856	anatomical structure development	9	565	0.0036	ENSGALP00000010520,ENSGALP00000012019,ENSGALP00000012298,ENSGALP00000013122,ENSGALP00000017553,ENSGALP00000019399,ENSGALP00000020445,ENSGALP00000024388,ENSGALP00000030864	BZW2,DPYSL2,HSPD1,MYH11,MYH9,RAB11A,RAB18,TAGLN,TTR
GO:0051252	regulation of RNA metabolic process	8	447	0.0036	ENSGALP00000000497,ENSGALP00000003130,ENSGALP00000005126,ENSGALP00000005212,ENSGALP00000014747,ENSGALP00000016173,ENSGALP00000026509,ENSGALP00000037222	CPSF6,DDX1,HDAC1,HMGB3,HNRNPDL,RPS6KA1,SMU1,SUB1
GO:0051656	establishment of organelle localization	3	34	0.0036	ENSGALP00000008112,ENSGALP00000012298,ENSGALP00000028746	AP3M1,RAB11A,YWHAZ
GO:0009205	purine ribonucleoside triphosphate metabolic process	3	35	0.0037	ENSGALP00000017934,ENSGALP00000023396,ENSGALP00000034078	CYCS,NME2,TPI1
GO:0051239	regulation of multicellular organismal process	6	244	0.0038	ENSGALP00000004164,ENSGALP00000012298,ENSGALP00000013122,ENSGALP00000014747,ENSGALP00000030864,ENSGALP00000034078	DPYSL2,HMGB3,HSPD1,NME2,PLS1,RAB11A
GO:0032535	regulation of cellular component size	3	37	0.0042	ENSGALP00000004164,ENSGALP00000012298,ENSGALP00000030864	DPYSL2,PLS1,RAB11A
GO:0050896	response to stimulus	10	718	0.0043	ENSGALP00000000497,ENSGALP00000006762,ENSGALP00000013122,ENSGALP00000014747,ENSGALP00000019120,ENSGALP00000022525,ENSGALP00000024388,ENSGALP00000025525,ENSGALP00000026509,ENSGALP00000030864	BLMH,CA2,DDX1,DPYSL2,HMGB3,HSPA2,HSPD1,PRPF19,RPS6KA1,TTR
GO:0033365	protein localization to organelle	3	40	0.0048	ENSGALP00000010754,ENSGALP00000012298,ENSGALP00000013122	HSPD1,MAPRE1,RAB11A
GO:0009167	purine ribonucleoside monophosphate metabolic process	3	41	0.0049	ENSGALP00000017934,ENSGALP00000023396,ENSGALP00000035973	CYCS,GART,TPI1
GO:0043280	positive regulation of cysteine-type endopeptidase activity involved in apoptotic process	2	8	0.0049	ENSGALP00000013122,ENSGALP00000017934	CYCS,HSPD1
GO:0048468	cell development	5	175	0.0049	ENSGALP00000010520,ENSGALP00000012298,ENSGALP00000020445,ENSGALP00000024388,ENSGALP00000030864	DPYSL2,MYH11,MYH9,RAB11A,TTR
GO:0048518	positive regulation of biological process	8	481	0.0049	ENSGALP00000000497,ENSGALP00000004164,ENSGALP00000005126,ENSGALP00000012298,ENSGALP00000013122,ENSGALP00000016173,ENSGALP00000017934,ENSGALP00000034078	CPSF6,CYCS,HSPD1,NME2,PLS1,RAB11A,RPS6KA1,SUB1
GO:0050865	regulation of cell activation	3	41	0.0049	ENSGALP00000000497,ENSGALP00000013122,ENSGALP00000014747	HMGB3,HSPD1,RPS6KA1
GO:0061077	chaperone-mediated protein folding	2	8	0.0049	ENSGALP00000013122,ENSGALP00000025461	CCT8,HSPD1
GO:0099131	ATP hydrolysis coupled ion transmembrane transport	2	8	0.0049	ENSGALP00000002373,ENSGALP00000024150	ATP1A1,ATP2A3
GO:0099132	ATP hydrolysis coupled cation transmembrane transport	2	8	0.0049	ENSGALP00000002373,ENSGALP00000024150	ATP1A1,ATP2A3
GO:1901566	organonitrogen compound biosynthetic process	5	177	0.0051	ENSGALP00000001013,ENSGALP00000023396,ENSGALP00000026307,ENSGALP00000034078,ENSGALP00000035973	EIF2S3,GART,NME2,RPL22,TPI1
GO:0030154	cell differentiation	7	376	0.0052	ENSGALP00000010520,ENSGALP00000012298,ENSGALP00000017553,ENSGALP00000019399,ENSGALP00000020445,ENSGALP00000024388,ENSGALP00000030864	BZW2,DPYSL2,MYH11,MYH9,RAB11A,TAGLN,TTR
GO:0009060	aerobic respiration	2	9	0.0053	ENSGALP00000000693,ENSGALP00000017934	CYCS,SDHB
GO:0022604	regulation of cell morphogenesis	3	44	0.0055	ENSGALP00000012298,ENSGALP00000020445,ENSGALP00000030864	DPYSL2,MYH9,RAB11A
GO:0043254	regulation of protein complex assembly	3	44	0.0055	ENSGALP00000005126,ENSGALP00000010754,ENSGALP00000020884	MAPRE1,SUB1,TUBB2B
GO:0010468	regulation of gene expression	8	503	0.0056	ENSGALP00000000497,ENSGALP00000003130,ENSGALP00000005126,ENSGALP00000005212,ENSGALP00000014747,ENSGALP00000016173,ENSGALP00000026509,ENSGALP00000037222	CPSF6,DDX1,HDAC1,HMGB3,HNRNPDL,RPS6KA1,SMU1,SUB1
GO:0030516	regulation of axon extension	2	10	0.0061	ENSGALP00000012298,ENSGALP00000030864	DPYSL2,RAB11A
GO:0032501	multicellular organismal process	9	644	0.0064	ENSGALP00000004164,ENSGALP00000010520,ENSGALP00000012019,ENSGALP00000012298,ENSGALP00000013122,ENSGALP00000017553,ENSGALP00000020445,ENSGALP00000024388,ENSGALP00000030864	BZW2,DPYSL2,HSPD1,MYH11,MYH9,PLS1,RAB11A,RAB18,TTR
GO:0048731	system development	7	412	0.0079	ENSGALP00000010520,ENSGALP00000012019,ENSGALP00000012298,ENSGALP00000013122,ENSGALP00000017553,ENSGALP00000020445,ENSGALP00000030864	BZW2,DPYSL2,HSPD1,MYH11,MYH9,RAB11A,RAB18
GO:0006605	protein targeting	2	12	0.0081	ENSGALP00000013122,ENSGALP00000028746	HSPD1,YWHAZ
GO:0022904	respiratory electron transport chain	2	12	0.0081	ENSGALP00000000693,ENSGALP00000017934	CYCS,SDHB
GO:0050684	regulation of mRNA processing	2	12	0.0081	ENSGALP00000003130,ENSGALP00000016173	CPSF6,SMU1
GO:0051650	establishment of vesicle localization	2	12	0.0081	ENSGALP00000008112,ENSGALP00000012298	AP3M1,RAB11A
GO:0120035	regulation of plasma membrane bounded cell projection organization	3	55	0.0089	ENSGALP00000004164,ENSGALP00000012298,ENSGALP00000030864	DPYSL2,PLS1,RAB11A
GO:0006090	pyruvate metabolic process	2	14	0.0099	ENSGALP00000023396,ENSGALP00000041792	LDHB,TPI1
GO:0006165	nucleoside diphosphate phosphorylation	2	14	0.0099	ENSGALP00000023396,ENSGALP00000034078	NME2,TPI1
GO:0030036	actin cytoskeleton organization	3	58	0.0099	ENSGALP00000004164,ENSGALP00000010520,ENSGALP00000020445	MYH11,MYH9,PLS1
GO:0051262	protein tetramerization	2	14	0.0099	ENSGALP00000016173,ENSGALP00000024388	CPSF6,TTR
GO:0034645	cellular macromolecule biosynthetic process	7	438	0.01	ENSGALP00000001013,ENSGALP00000005126,ENSGALP00000005212,ENSGALP00000014747,ENSGALP00000026307,ENSGALP00000026509,ENSGALP00000037222	DDX1,EIF2S3,HDAC1,HMGB3,HNRNPDL,RPL22,SUB1
GO:0097435	supramolecular fiber organization	3	60	0.0106	ENSGALP00000004164,ENSGALP00000010520,ENSGALP00000012298	MYH11,PLS1,RAB11A
GO:0065008	regulation of biological quality	6	330	0.0111	ENSGALP00000004164,ENSGALP00000012298,ENSGALP00000013122,ENSGALP00000020445,ENSGALP00000024388,ENSGALP00000030864	DPYSL2,HSPD1,MYH9,PLS1,RAB11A,TTR
GO:0032392	DNA geometric change	2	16	0.0117	ENSGALP00000014747,ENSGALP00000026509	DDX1,HMGB3
GO:0016310	phosphorylation	4	136	0.0118	ENSGALP00000000497,ENSGALP00000017934,ENSGALP00000023396,ENSGALP00000034078	CYCS,NME2,RPS6KA1,TPI1
GO:0006518	peptide metabolic process	3	65	0.0126	ENSGALP00000001013,ENSGALP00000026289,ENSGALP00000026307	EIF2S3,GSTA,RPL22
GO:0009206	purine ribonucleoside triphosphate biosynthetic process	2	17	0.0128	ENSGALP00000023396,ENSGALP00000034078	NME2,TPI1
GO:0017144	drug metabolic process	3	68	0.0137	ENSGALP00000000693,ENSGALP00000017934,ENSGALP00000023396	CYCS,SDHB,TPI1
GO:0051240	positive regulation of multicellular organismal process	4	146	0.0141	ENSGALP00000004164,ENSGALP00000012298,ENSGALP00000013122,ENSGALP00000034078	HSPD1,NME2,PLS1,RAB11A
GO:0006790	sulfur compound metabolic process	2	19	0.0147	ENSGALP00000006762,ENSGALP00000026289	BLMH,GSTA
GO:0034404	nucleobase-containing small molecule biosynthetic process	2	19	0.0147	ENSGALP00000023396,ENSGALP00000034078	NME2,TPI1
GO:0048639	positive regulation of developmental growth	2	19	0.0147	ENSGALP00000004164,ENSGALP00000012298	PLS1,RAB11A
GO:0070925	organelle assembly	3	71	0.0147	ENSGALP00000004164,ENSGALP00000010520,ENSGALP00000012298	MYH11,PLS1,RAB11A
GO:0016050	vesicle organization	2	20	0.0157	ENSGALP00000012298,ENSGALP00000014280	RAB11A,SEC23B
GO:0072594	establishment of protein localization to organelle	2	20	0.0157	ENSGALP00000012298,ENSGALP00000013122	HSPD1,RAB11A
GO:0042493	response to drug	3	74	0.0162	ENSGALP00000006762,ENSGALP00000019120,ENSGALP00000025525	BLMH,CA2,HSPA2
GO:0044267	cellular protein metabolic process	6	366	0.0162	ENSGALP00000000497,ENSGALP00000001013,ENSGALP00000005212,ENSGALP00000022525,ENSGALP00000026307,ENSGALP00000026345	ACP1,EIF2S3,HDAC1,PRPF19,RPL22,RPS6KA1
GO:0000398	mRNA splicing, via spliceosome	2	21	0.0168	ENSGALP00000003130,ENSGALP00000022525	PRPF19,SMU1
GO:0043066	negative regulation of apoptotic process	3	80	0.0192	ENSGALP00000000497,ENSGALP00000013122,ENSGALP00000034078	HSPD1,NME2,RPS6KA1
GO:0044282	small molecule catabolic process	2	23	0.0192	ENSGALP00000006762,ENSGALP00000023396	BLMH,TPI1
GO:0006334	nucleosome assembly	2	25	0.0216	ENSGALP00000021907,ENSGALP00000037260	ANP32E,HIST1H2B5
GO:0009168	purine ribonucleoside monophosphate biosynthetic process	2	25	0.0216	ENSGALP00000023396,ENSGALP00000035973	GART,TPI1
GO:0045595	regulation of cell differentiation	4	176	0.0233	ENSGALP00000012298,ENSGALP00000014747,ENSGALP00000030864,ENSGALP00000034078	DPYSL2,HMGB3,NME2,RAB11A
GO:0048523	negative regulation of cellular process	6	414	0.0254	ENSGALP00000000497,ENSGALP00000010754,ENSGALP00000013122,ENSGALP00000014747,ENSGALP00000020884,ENSGALP00000034078	HMGB3,HSPD1,MAPRE1,NME2,RPS6KA1,TUBB2B
GO:2000026	regulation of multicellular organismal development	4	183	0.0258	ENSGALP00000012298,ENSGALP00000014747,ENSGALP00000030864,ENSGALP00000034078	DPYSL2,HMGB3,NME2,RAB11A
GO:0006325	chromatin organization	3	94	0.0267	ENSGALP00000005212,ENSGALP00000021907,ENSGALP00000037260	ANP32E,HDAC1,HIST1H2B5
GO:0032989	cellular component morphogenesis	3	94	0.0267	ENSGALP00000010520,ENSGALP00000020445,ENSGALP00000030864	DPYSL2,MYH11,MYH9
GO:0006355	regulation of transcription, DNA-templated	6	423	0.0275	ENSGALP00000000497,ENSGALP00000005126,ENSGALP00000005212,ENSGALP00000014747,ENSGALP00000026509,ENSGALP00000037222	DDX1,HDAC1,HMGB3,HNRNPDL,RPS6KA1,SUB1
GO:0050867	positive regulation of cell activation	2	30	0.0278	ENSGALP00000000497,ENSGALP00000013122	HSPD1,RPS6KA1
GO:0006351	transcription, DNA-templated	5	302	0.0288	ENSGALP00000005126,ENSGALP00000005212,ENSGALP00000014747,ENSGALP00000026509,ENSGALP00000037222	DDX1,HDAC1,HMGB3,HNRNPDL,SUB1
GO:0006950	response to stress	5	302	0.0288	ENSGALP00000013122,ENSGALP00000014747,ENSGALP00000019120,ENSGALP00000022525,ENSGALP00000026509	DDX1,HMGB3,HSPA2,HSPD1,PRPF19
GO:0022618	ribonucleoprotein complex assembly	2	31	0.0288	ENSGALP00000016173,ENSGALP00000022525	CPSF6,PRPF19
GO:0046034	ATP metabolic process	2	31	0.0288	ENSGALP00000017934,ENSGALP00000023396	CYCS,TPI1
GO:0065009	regulation of molecular function	5	306	0.0293	ENSGALP00000000497,ENSGALP00000013122,ENSGALP00000017934,ENSGALP00000021907,ENSGALP00000024388	ANP32E,CYCS,HSPD1,RPS6KA1,TTR
GO:0048522	positive regulation of cellular process	6	434	0.0296	ENSGALP00000000497,ENSGALP00000005126,ENSGALP00000012298,ENSGALP00000013122,ENSGALP00000017934,ENSGALP00000034078	CYCS,HSPD1,NME2,RAB11A,RPS6KA1,SUB1
GO:0055085	transmembrane transport	3	108	0.0359	ENSGALP00000002373,ENSGALP00000013122,ENSGALP00000024150	ATP1A1,ATP2A3,HSPD1
GO:0050790	regulation of catalytic activity	4	208	0.0365	ENSGALP00000000497,ENSGALP00000013122,ENSGALP00000017934,ENSGALP00000021907	ANP32E,CYCS,HSPD1,RPS6KA1
GO:0051249	regulation of lymphocyte activation	2	37	0.038	ENSGALP00000013122,ENSGALP00000014747	HMGB3,HSPD1
GO:0042221	response to chemical	5	331	0.0388	ENSGALP00000006762,ENSGALP00000013122,ENSGALP00000019120,ENSGALP00000025525,ENSGALP00000030864	BLMH,CA2,DPYSL2,HSPA2,HSPD1
GO:0006259	DNA metabolic process	3	120	0.045	ENSGALP00000013122,ENSGALP00000022525,ENSGALP00000026509	DDX1,HSPD1,PRPF19
GO:0007399	nervous system development	4	225	0.0452	ENSGALP00000012019,ENSGALP00000012298,ENSGALP00000017553,ENSGALP00000030864	BZW2,DPYSL2,RAB11A,RAB18
GO:0005975	carbohydrate metabolic process	2	44	0.0491	ENSGALP00000023396,ENSGALP00000041792	LDHB,TPI1
GO:0051186	cofactor metabolic process	2	44	0.0491	ENSGALP00000023396,ENSGALP00000026289	GSTA,TPI1

## Sheet: GO C2-up DOH
Gene Ontology Terms with upregulated proteins in C2 treatment at Day of hatch (DOH)
#term ID	term description	observed gene count	background gene count	false discovery rate	matching proteins in your network (IDs)	matching proteins in your network (labels)
GO:0009987	cellular process	32	1590	1.61e-18	ENSGALP00000002197,ENSGALP00000002383,ENSGALP00000003637,ENSGALP00000004034,ENSGALP00000005161,ENSGALP00000008664,ENSGALP00000010267,ENSGALP00000011291,ENSGALP00000011718,ENSGALP00000012744,ENSGALP00000014280,ENSGALP00000015057,ENSGALP00000015061,ENSGALP00000016629,ENSGALP00000016789,ENSGALP00000017462,ENSGALP00000018410,ENSGALP00000019616,ENSGALP00000021028,ENSGALP00000022671,ENSGALP00000025681,…	ALDOC,ANPEP,APOOL,ASL2,CAMK2D,CTNNA2,DDX1,DHRS11,EIF4G2,FGA,FGB,GSN,H2AFY,HMGB2,LECT1,MAGT1,MYPT1,ND2,PDLIM7,PGAM1,PRDX1,RDX,RHOC,S100A9,SEC23B,SNRPB,SORD,STAT3,SURF4,TOP2B,YBX1,YWHAZ
GO:0065007	biological regulation	24	1189	1.52e-12	ENSGALP00000002197,ENSGALP00000002383,ENSGALP00000005161,ENSGALP00000008664,ENSGALP00000010267,ENSGALP00000015057,ENSGALP00000015061,ENSGALP00000016629,ENSGALP00000016789,ENSGALP00000017462,ENSGALP00000018410,ENSGALP00000019616,ENSGALP00000021028,ENSGALP00000022671,ENSGALP00000025681,ENSGALP00000026509,ENSGALP00000028746,ENSGALP00000038408,ENSGALP00000038677,ENSGALP00000039068,ENSGALP00000040682,…	ANPEP,CAMK2D,CTNNA2,DDX1,DHRS11,EIF4G2,FGA,FGB,GSN,H2AFY,HMGB2,MYPT1,NUDT16L1,PDLIM7,PGAM1,PRDX1,RDX,RHOC,S100A9,STAT3,SURF4,TOP2B,YBX1,YWHAZ
GO:0008152	metabolic process	22	1070	1.75e-11	ENSGALP00000003637,ENSGALP00000004034,ENSGALP00000005161,ENSGALP00000008664,ENSGALP00000011718,ENSGALP00000012744,ENSGALP00000016629,ENSGALP00000016630,ENSGALP00000016789,ENSGALP00000017462,ENSGALP00000018410,ENSGALP00000019616,ENSGALP00000022671,ENSGALP00000026509,ENSGALP00000026550,ENSGALP00000034613,ENSGALP00000038408,ENSGALP00000038677,ENSGALP00000039068,ENSGALP00000039613,ENSGALP00000040682,…	AKR1A1,ALDOC,ANPEP,APOB,ASL2,CAMK2D,DDX1,DHRS11,EIF4G2,HMGB2,LMF2,MAGT1,MYPT1,ND2,PGAM1,PRDX1,S100A9,SNRPB,SORD,STAT3,TOP2B,YBX1
GO:0050794	regulation of cellular process	21	1051	1.1e-10	ENSGALP00000002197,ENSGALP00000002383,ENSGALP00000005161,ENSGALP00000010267,ENSGALP00000016629,ENSGALP00000016789,ENSGALP00000017462,ENSGALP00000018410,ENSGALP00000019616,ENSGALP00000021028,ENSGALP00000022671,ENSGALP00000025681,ENSGALP00000026509,ENSGALP00000028746,ENSGALP00000038408,ENSGALP00000038677,ENSGALP00000039068,ENSGALP00000040682,ENSGALP00000041673,ENSGALP00000041772,ENSGALP00000042621	ANPEP,CAMK2D,CTNNA2,DDX1,EIF4G2,GSN,H2AFY,HMGB2,MYPT1,NUDT16L1,PDLIM7,PGAM1,PRDX1,RDX,RHOC,S100A9,STAT3,SURF4,TOP2B,YBX1,YWHAZ
GO:0016043	cellular component organization	16	526	2.65e-10	ENSGALP00000002197,ENSGALP00000002383,ENSGALP00000010267,ENSGALP00000011291,ENSGALP00000011718,ENSGALP00000014280,ENSGALP00000015057,ENSGALP00000015061,ENSGALP00000016789,ENSGALP00000017462,ENSGALP00000018410,ENSGALP00000021028,ENSGALP00000025681,ENSGALP00000026509,ENSGALP00000028746,ENSGALP00000041673	APOOL,CTNNA2,DDX1,FGA,FGB,GSN,H2AFY,HMGB2,MYPT1,RDX,RHOC,SEC23B,SNRPB,SURF4,TOP2B,YWHAZ
GO:0044238	primary metabolic process	19	971	1.58e-09	ENSGALP00000003637,ENSGALP00000004034,ENSGALP00000005161,ENSGALP00000008664,ENSGALP00000011718,ENSGALP00000012744,ENSGALP00000016789,ENSGALP00000017462,ENSGALP00000018410,ENSGALP00000019616,ENSGALP00000026509,ENSGALP00000026550,ENSGALP00000034613,ENSGALP00000038408,ENSGALP00000038677,ENSGALP00000039068,ENSGALP00000039613,ENSGALP00000040682,ENSGALP00000043256	ALDOC,ANPEP,APOB,ASL2,CAMK2D,DDX1,DHRS11,EIF4G2,HMGB2,LMF2,MAGT1,MYPT1,ND2,PGAM1,SNRPB,SORD,STAT3,TOP2B,YBX1
GO:0044237	cellular metabolic process	19	988	1.89e-09	ENSGALP00000003637,ENSGALP00000004034,ENSGALP00000005161,ENSGALP00000008664,ENSGALP00000011718,ENSGALP00000012744,ENSGALP00000016629,ENSGALP00000016789,ENSGALP00000017462,ENSGALP00000018410,ENSGALP00000019616,ENSGALP00000022671,ENSGALP00000026509,ENSGALP00000034613,ENSGALP00000038408,ENSGALP00000038677,ENSGALP00000039068,ENSGALP00000040682,ENSGALP00000043256	ALDOC,ANPEP,ASL2,CAMK2D,DDX1,DHRS11,EIF4G2,HMGB2,MAGT1,MYPT1,ND2,PGAM1,PRDX1,S100A9,SNRPB,SORD,STAT3,TOP2B,YBX1
GO:0071704	organic substance metabolic process	19	1008	2.4e-09	ENSGALP00000003637,ENSGALP00000004034,ENSGALP00000005161,ENSGALP00000008664,ENSGALP00000011718,ENSGALP00000012744,ENSGALP00000016789,ENSGALP00000017462,ENSGALP00000018410,ENSGALP00000019616,ENSGALP00000026509,ENSGALP00000026550,ENSGALP00000034613,ENSGALP00000038408,ENSGALP00000038677,ENSGALP00000039068,ENSGALP00000039613,ENSGALP00000040682,ENSGALP00000043256	ALDOC,ANPEP,APOB,ASL2,CAMK2D,DDX1,DHRS11,EIF4G2,HMGB2,LMF2,MAGT1,MYPT1,ND2,PGAM1,SNRPB,SORD,STAT3,TOP2B,YBX1
GO:0006807	nitrogen compound metabolic process	17	930	5.58e-08	ENSGALP00000003637,ENSGALP00000004034,ENSGALP00000005161,ENSGALP00000011718,ENSGALP00000012744,ENSGALP00000016789,ENSGALP00000017462,ENSGALP00000018410,ENSGALP00000019616,ENSGALP00000026509,ENSGALP00000034613,ENSGALP00000038408,ENSGALP00000038677,ENSGALP00000039068,ENSGALP00000039613,ENSGALP00000040682,ENSGALP00000043256	ALDOC,ANPEP,ASL2,CAMK2D,DDX1,EIF4G2,HMGB2,LMF2,MAGT1,MYPT1,ND2,PGAM1,SNRPB,SORD,STAT3,TOP2B,YBX1
GO:0006996	organelle organization	10	345	5.52e-06	ENSGALP00000002197,ENSGALP00000010267,ENSGALP00000011291,ENSGALP00000014280,ENSGALP00000016789,ENSGALP00000017462,ENSGALP00000018410,ENSGALP00000026509,ENSGALP00000028746,ENSGALP00000041673	APOOL,DDX1,GSN,H2AFY,HMGB2,MYPT1,SEC23B,SURF4,TOP2B,YWHAZ
GO:1901360	organic cyclic compound metabolic process	12	594	9.73e-06	ENSGALP00000003637,ENSGALP00000005161,ENSGALP00000008664,ENSGALP00000011718,ENSGALP00000017462,ENSGALP00000018410,ENSGALP00000026509,ENSGALP00000026550,ENSGALP00000034613,ENSGALP00000038408,ENSGALP00000038677,ENSGALP00000043256	ALDOC,APOB,DDX1,DHRS11,HMGB2,ND2,PGAM1,SNRPB,SORD,STAT3,TOP2B,YBX1
GO:0034641	cellular nitrogen compound metabolic process	12	630	1.69e-05	ENSGALP00000003637,ENSGALP00000005161,ENSGALP00000011718,ENSGALP00000017462,ENSGALP00000018410,ENSGALP00000026509,ENSGALP00000034613,ENSGALP00000038408,ENSGALP00000038677,ENSGALP00000039068,ENSGALP00000040682,ENSGALP00000043256	ALDOC,ANPEP,DDX1,EIF4G2,HMGB2,ND2,PGAM1,SNRPB,SORD,STAT3,TOP2B,YBX1
GO:1901564	organonitrogen compound metabolic process	11	534	2.58e-05	ENSGALP00000003637,ENSGALP00000004034,ENSGALP00000012744,ENSGALP00000016789,ENSGALP00000019616,ENSGALP00000034613,ENSGALP00000038677,ENSGALP00000039068,ENSGALP00000039613,ENSGALP00000040682,ENSGALP00000043256	ALDOC,ANPEP,ASL2,CAMK2D,EIF4G2,LMF2,MAGT1,MYPT1,ND2,PGAM1,SORD
GO:0022607	cellular component assembly	8	234	2.99e-05	ENSGALP00000002197,ENSGALP00000002383,ENSGALP00000010267,ENSGALP00000011718,ENSGALP00000014280,ENSGALP00000015057,ENSGALP00000015061,ENSGALP00000028746	FGA,FGB,GSN,H2AFY,RHOC,SEC23B,SNRPB,YWHAZ
GO:0044249	cellular biosynthetic process	11	548	2.99e-05	ENSGALP00000003637,ENSGALP00000004034,ENSGALP00000005161,ENSGALP00000008664,ENSGALP00000012744,ENSGALP00000017462,ENSGALP00000026509,ENSGALP00000038408,ENSGALP00000038677,ENSGALP00000039068,ENSGALP00000043256	ALDOC,ASL2,DDX1,DHRS11,EIF4G2,HMGB2,MAGT1,PGAM1,SORD,STAT3,YBX1
GO:0065008	regulation of biological quality	9	330	3e-05	ENSGALP00000002197,ENSGALP00000005161,ENSGALP00000008664,ENSGALP00000015057,ENSGALP00000015061,ENSGALP00000016629,ENSGALP00000021028,ENSGALP00000025681,ENSGALP00000040682	ANPEP,CTNNA2,DHRS11,FGA,FGB,GSN,PRDX1,RDX,STAT3
GO:1901576	organic substance biosynthetic process	11	556	3.01e-05	ENSGALP00000003637,ENSGALP00000004034,ENSGALP00000005161,ENSGALP00000008664,ENSGALP00000012744,ENSGALP00000017462,ENSGALP00000026509,ENSGALP00000038408,ENSGALP00000038677,ENSGALP00000039068,ENSGALP00000043256	ALDOC,ASL2,DDX1,DHRS11,EIF4G2,HMGB2,MAGT1,PGAM1,SORD,STAT3,YBX1
GO:0033036	macromolecule localization	7	181	5.49e-05	ENSGALP00000005161,ENSGALP00000010267,ENSGALP00000014280,ENSGALP00000025681,ENSGALP00000026550,ENSGALP00000028746,ENSGALP00000038322	APOB,CTNNA2,H2AFY,SEC23B,STAT3,VPS29,YWHAZ
GO:0051171	regulation of nitrogen compound metabolic process	11	625	7.68e-05	ENSGALP00000005161,ENSGALP00000010267,ENSGALP00000016629,ENSGALP00000016789,ENSGALP00000017462,ENSGALP00000026509,ENSGALP00000038408,ENSGALP00000038677,ENSGALP00000039068,ENSGALP00000041772,ENSGALP00000042621	DDX1,EIF4G2,H2AFY,HMGB2,MYPT1,NUDT16L1,PDLIM7,PGAM1,PRDX1,STAT3,YBX1
GO:0080090	regulation of primary metabolic process	11	634	8.44e-05	ENSGALP00000005161,ENSGALP00000010267,ENSGALP00000016629,ENSGALP00000016789,ENSGALP00000017462,ENSGALP00000026509,ENSGALP00000038408,ENSGALP00000038677,ENSGALP00000039068,ENSGALP00000041772,ENSGALP00000042621	DDX1,EIF4G2,H2AFY,HMGB2,MYPT1,NUDT16L1,PDLIM7,PGAM1,PRDX1,STAT3,YBX1
GO:0031323	regulation of cellular metabolic process	11	645	9.55e-05	ENSGALP00000005161,ENSGALP00000010267,ENSGALP00000016629,ENSGALP00000016789,ENSGALP00000017462,ENSGALP00000026509,ENSGALP00000038408,ENSGALP00000038677,ENSGALP00000039068,ENSGALP00000041772,ENSGALP00000042621	DDX1,EIF4G2,H2AFY,HMGB2,MYPT1,NUDT16L1,PDLIM7,PGAM1,PRDX1,STAT3,YBX1
GO:0060255	regulation of macromolecule metabolic process	11	645	9.55e-05	ENSGALP00000005161,ENSGALP00000010267,ENSGALP00000016629,ENSGALP00000016789,ENSGALP00000017462,ENSGALP00000026509,ENSGALP00000038408,ENSGALP00000038677,ENSGALP00000039068,ENSGALP00000041772,ENSGALP00000042621	DDX1,EIF4G2,H2AFY,HMGB2,MYPT1,NUDT16L1,PDLIM7,PGAM1,PRDX1,STAT3,YBX1
GO:0006950	response to stress	8	302	0.00011	ENSGALP00000002383,ENSGALP00000005161,ENSGALP00000015057,ENSGALP00000015061,ENSGALP00000016629,ENSGALP00000017462,ENSGALP00000022671,ENSGALP00000026509	DDX1,FGA,FGB,HMGB2,PRDX1,RHOC,S100A9,STAT3
GO:0006796	phosphate-containing compound metabolic process	7	218	0.00013	ENSGALP00000003637,ENSGALP00000005161,ENSGALP00000016789,ENSGALP00000019616,ENSGALP00000034613,ENSGALP00000038677,ENSGALP00000043256	ALDOC,CAMK2D,MYPT1,ND2,PGAM1,SORD,STAT3
GO:0043170	macromolecule metabolic process	12	825	0.00013	ENSGALP00000005161,ENSGALP00000011718,ENSGALP00000012744,ENSGALP00000016789,ENSGALP00000017462,ENSGALP00000018410,ENSGALP00000019616,ENSGALP00000026509,ENSGALP00000038408,ENSGALP00000039068,ENSGALP00000039613,ENSGALP00000040682	ANPEP,CAMK2D,DDX1,EIF4G2,HMGB2,LMF2,MAGT1,MYPT1,SNRPB,STAT3,TOP2B,YBX1
GO:0051179	localization	9	423	0.00013	ENSGALP00000002383,ENSGALP00000005161,ENSGALP00000010267,ENSGALP00000014280,ENSGALP00000025681,ENSGALP00000026550,ENSGALP00000028746,ENSGALP00000038322,ENSGALP00000042621	APOB,CTNNA2,H2AFY,PDLIM7,RHOC,SEC23B,STAT3,VPS29,YWHAZ
GO:0006139	nucleobase-containing compound metabolic process	10	553	0.00014	ENSGALP00000003637,ENSGALP00000005161,ENSGALP00000011718,ENSGALP00000017462,ENSGALP00000018410,ENSGALP00000026509,ENSGALP00000034613,ENSGALP00000038408,ENSGALP00000038677,ENSGALP00000043256	ALDOC,DDX1,HMGB2,ND2,PGAM1,SNRPB,SORD,STAT3,TOP2B,YBX1
GO:0008104	protein localization	6	150	0.00018	ENSGALP00000005161,ENSGALP00000010267,ENSGALP00000014280,ENSGALP00000025681,ENSGALP00000028746,ENSGALP00000038322	CTNNA2,H2AFY,SEC23B,STAT3,VPS29,YWHAZ
GO:0050896	response to stimulus	11	718	0.00018	ENSGALP00000002383,ENSGALP00000005161,ENSGALP00000015057,ENSGALP00000015061,ENSGALP00000016629,ENSGALP00000016789,ENSGALP00000017462,ENSGALP00000019616,ENSGALP00000022671,ENSGALP00000026509,ENSGALP00000040682	ANPEP,CAMK2D,DDX1,FGA,FGB,HMGB2,MYPT1,PRDX1,RHOC,S100A9,STAT3
GO:0019219	regulation of nucleobase-containing compound metabolic process	9	469	0.00024	ENSGALP00000005161,ENSGALP00000010267,ENSGALP00000016789,ENSGALP00000017462,ENSGALP00000026509,ENSGALP00000038408,ENSGALP00000038677,ENSGALP00000041772,ENSGALP00000042621	DDX1,H2AFY,HMGB2,MYPT1,NUDT16L1,PDLIM7,PGAM1,STAT3,YBX1
GO:0051641	cellular localization	6	163	0.00025	ENSGALP00000005161,ENSGALP00000010267,ENSGALP00000014280,ENSGALP00000028746,ENSGALP00000038322,ENSGALP00000042621	H2AFY,PDLIM7,SEC23B,STAT3,VPS29,YWHAZ
GO:0033043	regulation of organelle organization	5	98	0.00028	ENSGALP00000002197,ENSGALP00000002383,ENSGALP00000010267,ENSGALP00000021028,ENSGALP00000041673	GSN,H2AFY,RDX,RHOC,SURF4
GO:0034613	cellular protein localization	5	95	0.00028	ENSGALP00000005161,ENSGALP00000010267,ENSGALP00000014280,ENSGALP00000028746,ENSGALP00000038322	H2AFY,SEC23B,STAT3,VPS29,YWHAZ
GO:0044281	small molecule metabolic process	6	168	0.00028	ENSGALP00000003637,ENSGALP00000004034,ENSGALP00000026550,ENSGALP00000034613,ENSGALP00000038677,ENSGALP00000043256	ALDOC,APOB,ASL2,ND2,PGAM1,SORD
GO:0046907	intracellular transport	5	97	0.00028	ENSGALP00000005161,ENSGALP00000014280,ENSGALP00000028746,ENSGALP00000038322,ENSGALP00000042621	PDLIM7,SEC23B,STAT3,VPS29,YWHAZ
GO:0051186	cofactor metabolic process	4	44	0.00028	ENSGALP00000003637,ENSGALP00000016629,ENSGALP00000038677,ENSGALP00000043256	ALDOC,PGAM1,PRDX1,SORD
GO:0006886	intracellular protein transport	4	47	0.00033	ENSGALP00000005161,ENSGALP00000014280,ENSGALP00000028746,ENSGALP00000038322	SEC23B,STAT3,VPS29,YWHAZ
GO:0055114	oxidation-reduction process	5	102	0.00033	ENSGALP00000003637,ENSGALP00000008664,ENSGALP00000016629,ENSGALP00000016630,ENSGALP00000034613	AKR1A1,DHRS11,ND2,PRDX1,SORD
GO:0071103	DNA conformation change	4	47	0.00033	ENSGALP00000010267,ENSGALP00000017462,ENSGALP00000018410,ENSGALP00000026509	DDX1,H2AFY,HMGB2,TOP2B
GO:0019319	hexose biosynthetic process	3	15	0.00039	ENSGALP00000003637,ENSGALP00000038677,ENSGALP00000043256	ALDOC,PGAM1,SORD
GO:0046496	nicotinamide nucleotide metabolic process	3	15	0.00039	ENSGALP00000003637,ENSGALP00000038677,ENSGALP00000043256	ALDOC,PGAM1,SORD
GO:0001775	cell activation	4	52	0.00041	ENSGALP00000005161,ENSGALP00000015057,ENSGALP00000015061,ENSGALP00000016629	FGA,FGB,PRDX1,STAT3
GO:0016052	carbohydrate catabolic process	3	16	0.00041	ENSGALP00000003637,ENSGALP00000038677,ENSGALP00000043256	ALDOC,PGAM1,SORD
GO:0034622	cellular protein-containing complex assembly	5	110	0.00041	ENSGALP00000010267,ENSGALP00000011718,ENSGALP00000014280,ENSGALP00000015057,ENSGALP00000015061	FGA,FGB,H2AFY,SEC23B,SNRPB
GO:0045184	establishment of protein localization	5	113	0.00044	ENSGALP00000005161,ENSGALP00000010267,ENSGALP00000014280,ENSGALP00000028746,ENSGALP00000038322	H2AFY,SEC23B,STAT3,VPS29,YWHAZ
GO:0010638	positive regulation of organelle organization	4	56	0.00047	ENSGALP00000002197,ENSGALP00000002383,ENSGALP00000010267,ENSGALP00000041673	GSN,H2AFY,RHOC,SURF4
GO:0019318	hexose metabolic process	3	17	0.00047	ENSGALP00000003637,ENSGALP00000038677,ENSGALP00000043256	ALDOC,PGAM1,SORD
GO:0044283	small molecule biosynthetic process	4	62	0.00067	ENSGALP00000003637,ENSGALP00000004034,ENSGALP00000038677,ENSGALP00000043256	ALDOC,ASL2,PGAM1,SORD
GO:0044248	cellular catabolic process	5	131	0.00076	ENSGALP00000003637,ENSGALP00000016629,ENSGALP00000038677,ENSGALP00000040682,ENSGALP00000043256	ALDOC,ANPEP,PGAM1,PRDX1,SORD
GO:0051128	regulation of cellular component organization	6	219	0.00076	ENSGALP00000002197,ENSGALP00000002383,ENSGALP00000010267,ENSGALP00000021028,ENSGALP00000025681,ENSGALP00000041673	CTNNA2,GSN,H2AFY,RDX,RHOC,SURF4
GO:0016071	mRNA metabolic process	4	66	0.0008	ENSGALP00000005161,ENSGALP00000011718,ENSGALP00000026509,ENSGALP00000038408	DDX1,SNRPB,STAT3,YBX1
GO:0016310	phosphorylation	5	136	0.00086	ENSGALP00000005161,ENSGALP00000019616,ENSGALP00000034613,ENSGALP00000038677,ENSGALP00000043256	ALDOC,CAMK2D,ND2,PGAM1,STAT3
GO:0009117	nucleotide metabolic process	4	68	0.00087	ENSGALP00000003637,ENSGALP00000034613,ENSGALP00000038677,ENSGALP00000043256	ALDOC,ND2,PGAM1,SORD
GO:0017144	drug metabolic process	4	68	0.00087	ENSGALP00000016629,ENSGALP00000034613,ENSGALP00000038677,ENSGALP00000043256	ALDOC,ND2,PGAM1,PRDX1
GO:2000112	regulation of cellular macromolecule biosynthetic process	8	464	0.00089	ENSGALP00000005161,ENSGALP00000010267,ENSGALP00000016789,ENSGALP00000017462,ENSGALP00000026509,ENSGALP00000038408,ENSGALP00000039068,ENSGALP00000042621	DDX1,EIF4G2,H2AFY,HMGB2,MYPT1,PDLIM7,STAT3,YBX1
GO:0051234	establishment of localization	7	341	0.00091	ENSGALP00000005161,ENSGALP00000010267,ENSGALP00000014280,ENSGALP00000026550,ENSGALP00000028746,ENSGALP00000038322,ENSGALP00000042621	APOB,H2AFY,PDLIM7,SEC23B,STAT3,VPS29,YWHAZ
GO:0010639	negative regulation of organelle organization	3	25	0.00098	ENSGALP00000002197,ENSGALP00000010267,ENSGALP00000021028	GSN,H2AFY,RDX
GO:0042060	wound healing	3	26	0.0011	ENSGALP00000002383,ENSGALP00000015057,ENSGALP00000015061	FGA,FGB,RHOC
GO:0010468	regulation of gene expression	8	503	0.0013	ENSGALP00000005161,ENSGALP00000010267,ENSGALP00000016789,ENSGALP00000017462,ENSGALP00000026509,ENSGALP00000038408,ENSGALP00000039068,ENSGALP00000042621	DDX1,EIF4G2,H2AFY,HMGB2,MYPT1,PDLIM7,STAT3,YBX1
GO:0030168	platelet activation	2	4	0.0015	ENSGALP00000015057,ENSGALP00000015061	FGA,FGB
GO:0019220	regulation of phosphate metabolic process	5	164	0.0016	ENSGALP00000005161,ENSGALP00000010267,ENSGALP00000016629,ENSGALP00000016789,ENSGALP00000038677	H2AFY,MYPT1,PGAM1,PRDX1,STAT3
GO:0046034	ATP metabolic process	3	31	0.0016	ENSGALP00000034613,ENSGALP00000038677,ENSGALP00000043256	ALDOC,ND2,PGAM1
GO:0071702	organic substance transport	5	165	0.0016	ENSGALP00000005161,ENSGALP00000014280,ENSGALP00000026550,ENSGALP00000028746,ENSGALP00000038322	APOB,SEC23B,STAT3,VPS29,YWHAZ
GO:0110053	regulation of actin filament organization	3	32	0.0016	ENSGALP00000002197,ENSGALP00000002383,ENSGALP00000021028	GSN,RDX,RHOC
GO:1901362	organic cyclic compound biosynthetic process	7	385	0.0016	ENSGALP00000005161,ENSGALP00000008664,ENSGALP00000017462,ENSGALP00000026509,ENSGALP00000038408,ENSGALP00000038677,ENSGALP00000043256	ALDOC,DDX1,DHRS11,HMGB2,PGAM1,STAT3,YBX1
GO:0006955	immune response	4	90	0.0018	ENSGALP00000005161,ENSGALP00000016629,ENSGALP00000017462,ENSGALP00000022671	HMGB2,PRDX1,S100A9,STAT3
GO:0006091	generation of precursor metabolites and energy	3	34	0.0019	ENSGALP00000034613,ENSGALP00000038677,ENSGALP00000043256	ALDOC,ND2,PGAM1
GO:1901566	organonitrogen compound biosynthetic process	5	177	0.002	ENSGALP00000004034,ENSGALP00000012744,ENSGALP00000038677,ENSGALP00000039068,ENSGALP00000043256	ALDOC,ASL2,EIF4G2,MAGT1,PGAM1
GO:0080134	regulation of response to stress	4	96	0.0021	ENSGALP00000010267,ENSGALP00000016629,ENSGALP00000022671,ENSGALP00000041772	H2AFY,NUDT16L1,PRDX1,S100A9
GO:0006355	regulation of transcription, DNA-templated	7	423	0.0023	ENSGALP00000005161,ENSGALP00000010267,ENSGALP00000016789,ENSGALP00000017462,ENSGALP00000026509,ENSGALP00000038408,ENSGALP00000042621	DDX1,H2AFY,HMGB2,MYPT1,PDLIM7,STAT3,YBX1
GO:0032879	regulation of localization	5	187	0.0023	ENSGALP00000002383,ENSGALP00000005161,ENSGALP00000010267,ENSGALP00000016789,ENSGALP00000042621	H2AFY,MYPT1,PDLIM7,RHOC,STAT3
GO:0044260	cellular macromolecule metabolic process	9	721	0.0023	ENSGALP00000005161,ENSGALP00000012744,ENSGALP00000016789,ENSGALP00000017462,ENSGALP00000018410,ENSGALP00000019616,ENSGALP00000026509,ENSGALP00000038408,ENSGALP00000039068	CAMK2D,DDX1,EIF4G2,HMGB2,MAGT1,MYPT1,STAT3,TOP2B,YBX1
GO:0046394	carboxylic acid biosynthetic process	3	38	0.0023	ENSGALP00000004034,ENSGALP00000038677,ENSGALP00000043256	ALDOC,ASL2,PGAM1
GO:0051196	regulation of coenzyme metabolic process	2	6	0.0023	ENSGALP00000005161,ENSGALP00000038677	PGAM1,STAT3
GO:0051716	cellular response to stimulus	8	560	0.0023	ENSGALP00000002383,ENSGALP00000005161,ENSGALP00000016629,ENSGALP00000016789,ENSGALP00000019616,ENSGALP00000022671,ENSGALP00000026509,ENSGALP00000040682	ANPEP,CAMK2D,DDX1,MYPT1,PRDX1,RHOC,S100A9,STAT3
GO:0072593	reactive oxygen species metabolic process	2	6	0.0023	ENSGALP00000016629,ENSGALP00000034613	ND2,PRDX1
GO:0006952	defense response	4	103	0.0024	ENSGALP00000005161,ENSGALP00000016629,ENSGALP00000017462,ENSGALP00000022671	HMGB2,PRDX1,S100A9,STAT3
GO:0044271	cellular nitrogen compound biosynthetic process	7	431	0.0024	ENSGALP00000005161,ENSGALP00000017462,ENSGALP00000026509,ENSGALP00000038408,ENSGALP00000038677,ENSGALP00000039068,ENSGALP00000043256	ALDOC,DDX1,EIF4G2,HMGB2,PGAM1,STAT3,YBX1
GO:0009167	purine ribonucleoside monophosphate metabolic process	3	41	0.0025	ENSGALP00000034613,ENSGALP00000038677,ENSGALP00000043256	ALDOC,ND2,PGAM1
GO:0010467	gene expression	7	440	0.0025	ENSGALP00000005161,ENSGALP00000011718,ENSGALP00000017462,ENSGALP00000026509,ENSGALP00000038408,ENSGALP00000039068,ENSGALP00000039613	DDX1,EIF4G2,HMGB2,LMF2,SNRPB,STAT3,YBX1
GO:0034248	regulation of cellular amide metabolic process	3	41	0.0025	ENSGALP00000005161,ENSGALP00000038677,ENSGALP00000039068	EIF4G2,PGAM1,STAT3
GO:0043470	regulation of carbohydrate catabolic process	2	7	0.0025	ENSGALP00000005161,ENSGALP00000038677	PGAM1,STAT3
GO:0048522	positive regulation of cellular process	7	434	0.0025	ENSGALP00000002197,ENSGALP00000002383,ENSGALP00000005161,ENSGALP00000010267,ENSGALP00000016789,ENSGALP00000022671,ENSGALP00000041673	GSN,H2AFY,MYPT1,RHOC,S100A9,STAT3,SURF4
GO:0051252	regulation of RNA metabolic process	7	447	0.0027	ENSGALP00000005161,ENSGALP00000010267,ENSGALP00000016789,ENSGALP00000017462,ENSGALP00000026509,ENSGALP00000038408,ENSGALP00000042621	DDX1,H2AFY,HMGB2,MYPT1,PDLIM7,STAT3,YBX1
GO:1901135	carbohydrate derivative metabolic process	4	109	0.0027	ENSGALP00000012744,ENSGALP00000034613,ENSGALP00000038677,ENSGALP00000043256	ALDOC,MAGT1,ND2,PGAM1
GO:0043254	regulation of protein complex assembly	3	44	0.0028	ENSGALP00000002197,ENSGALP00000002383,ENSGALP00000021028	GSN,RDX,RHOC
GO:0048519	negative regulation of biological process	7	453	0.0028	ENSGALP00000002197,ENSGALP00000005161,ENSGALP00000010267,ENSGALP00000018410,ENSGALP00000021028,ENSGALP00000041772,ENSGALP00000042621	GSN,H2AFY,NUDT16L1,PDLIM7,RDX,STAT3,TOP2B
GO:0006810	transport	6	331	0.0033	ENSGALP00000005161,ENSGALP00000014280,ENSGALP00000026550,ENSGALP00000028746,ENSGALP00000038322,ENSGALP00000042621	APOB,PDLIM7,SEC23B,STAT3,VPS29,YWHAZ
GO:0008380	RNA splicing	3	48	0.0033	ENSGALP00000011718,ENSGALP00000026509,ENSGALP00000038408	DDX1,SNRPB,YBX1
GO:1901575	organic substance catabolic process	4	121	0.0035	ENSGALP00000003637,ENSGALP00000038677,ENSGALP00000040682,ENSGALP00000043256	ALDOC,ANPEP,PGAM1,SORD
GO:0001906	cell killing	2	10	0.0038	ENSGALP00000016629,ENSGALP00000022671	PRDX1,S100A9
GO:0006096	glycolytic process	2	10	0.0038	ENSGALP00000038677,ENSGALP00000043256	ALDOC,PGAM1
GO:0006140	regulation of nucleotide metabolic process	2	10	0.0038	ENSGALP00000005161,ENSGALP00000038677	PGAM1,STAT3
GO:0006757	ATP generation from ADP	2	10	0.0038	ENSGALP00000038677,ENSGALP00000043256	ALDOC,PGAM1
GO:0032501	multicellular organismal process	8	644	0.0038	ENSGALP00000005161,ENSGALP00000015057,ENSGALP00000015061,ENSGALP00000019616,ENSGALP00000025681,ENSGALP00000027337,ENSGALP00000040682,ENSGALP00000042621	ANPEP,CAMK2D,CTNNA2,FGA,FGB,LECT1,PDLIM7,STAT3
GO:0042866	pyruvate biosynthetic process	2	10	0.0038	ENSGALP00000038677,ENSGALP00000043256	ALDOC,PGAM1
GO:0045087	innate immune response	3	52	0.0038	ENSGALP00000016629,ENSGALP00000017462,ENSGALP00000022671	HMGB2,PRDX1,S100A9
GO:0051693	actin filament capping	2	10	0.0038	ENSGALP00000002197,ENSGALP00000021028	GSN,RDX
GO:0019359	nicotinamide nucleotide biosynthetic process	2	11	0.0041	ENSGALP00000038677,ENSGALP00000043256	ALDOC,PGAM1
GO:0034654	nucleobase-containing compound biosynthetic process	6	357	0.0041	ENSGALP00000005161,ENSGALP00000017462,ENSGALP00000026509,ENSGALP00000038408,ENSGALP00000038677,ENSGALP00000043256	ALDOC,DDX1,HMGB2,PGAM1,STAT3,YBX1
GO:0051258	protein polymerization	2	11	0.0041	ENSGALP00000015057,ENSGALP00000015061	FGA,FGB
GO:0006397	mRNA processing	3	56	0.0042	ENSGALP00000011718,ENSGALP00000026509,ENSGALP00000038408	DDX1,SNRPB,YBX1
GO:0000278	mitotic cell cycle	3	58	0.0045	ENSGALP00000002383,ENSGALP00000016789,ENSGALP00000018410	MYPT1,RHOC,TOP2B
GO:0032268	regulation of cellular protein metabolic process	5	241	0.0045	ENSGALP00000005161,ENSGALP00000010267,ENSGALP00000016629,ENSGALP00000016789,ENSGALP00000039068	EIF4G2,H2AFY,MYPT1,PRDX1,STAT3
GO:0051345	positive regulation of hydrolase activity	3	58	0.0045	ENSGALP00000002383,ENSGALP00000005161,ENSGALP00000016789	MYPT1,RHOC,STAT3
GO:0007030	Golgi organization	2	13	0.0049	ENSGALP00000028746,ENSGALP00000041673	SURF4,YWHAZ
GO:0009166	nucleotide catabolic process	2	13	0.0049	ENSGALP00000038677,ENSGALP00000043256	ALDOC,PGAM1
GO:0006090	pyruvate metabolic process	2	14	0.0055	ENSGALP00000038677,ENSGALP00000043256	ALDOC,PGAM1
GO:0006094	gluconeogenesis	2	14	0.0055	ENSGALP00000038677,ENSGALP00000043256	ALDOC,PGAM1
GO:0010675	regulation of cellular carbohydrate metabolic process	2	15	0.006	ENSGALP00000005161,ENSGALP00000038677	PGAM1,STAT3
GO:0006006	glucose metabolic process	2	16	0.0066	ENSGALP00000038677,ENSGALP00000043256	ALDOC,PGAM1
GO:0006754	ATP biosynthetic process	2	16	0.0066	ENSGALP00000038677,ENSGALP00000043256	ALDOC,PGAM1
GO:0032392	DNA geometric change	2	16	0.0066	ENSGALP00000017462,ENSGALP00000026509	DDX1,HMGB2
GO:0019538	protein metabolic process	6	412	0.007	ENSGALP00000012744,ENSGALP00000016789,ENSGALP00000019616,ENSGALP00000039068,ENSGALP00000039613,ENSGALP00000040682	ANPEP,CAMK2D,EIF4G2,LMF2,MAGT1,MYPT1
GO:0048523	negative regulation of cellular process	6	414	0.0071	ENSGALP00000002197,ENSGALP00000005161,ENSGALP00000010267,ENSGALP00000018410,ENSGALP00000021028,ENSGALP00000041772	GSN,H2AFY,NUDT16L1,RDX,STAT3,TOP2B
GO:0022402	cell cycle process	3	77	0.0082	ENSGALP00000002383,ENSGALP00000016789,ENSGALP00000018410	MYPT1,RHOC,TOP2B
GO:1901137	carbohydrate derivative biosynthetic process	3	77	0.0082	ENSGALP00000012744,ENSGALP00000038677,ENSGALP00000043256	ALDOC,MAGT1,PGAM1
GO:0016458	gene silencing	2	19	0.0083	ENSGALP00000005161,ENSGALP00000010267	H2AFY,STAT3
GO:0040029	regulation of gene expression, epigenetic	2	19	0.0083	ENSGALP00000005161,ENSGALP00000010267	H2AFY,STAT3
GO:0034645	cellular macromolecule biosynthetic process	6	438	0.0088	ENSGALP00000005161,ENSGALP00000012744,ENSGALP00000017462,ENSGALP00000026509,ENSGALP00000038408,ENSGALP00000039068	DDX1,EIF4G2,HMGB2,MAGT1,STAT3,YBX1
GO:0072594	establishment of protein localization to organelle	2	20	0.0089	ENSGALP00000005161,ENSGALP00000010267	H2AFY,STAT3
GO:0008202	steroid metabolic process	2	21	0.0095	ENSGALP00000008664,ENSGALP00000026550	APOB,DHRS11
GO:0065009	regulation of molecular function	5	306	0.0097	ENSGALP00000002383,ENSGALP00000005161,ENSGALP00000010267,ENSGALP00000016789,ENSGALP00000042621	H2AFY,MYPT1,PDLIM7,RHOC,STAT3
GO:0031334	positive regulation of protein complex assembly	2	22	0.0101	ENSGALP00000002197,ENSGALP00000002383	GSN,RHOC
GO:0044092	negative regulation of molecular function	3	87	0.0105	ENSGALP00000010267,ENSGALP00000016789,ENSGALP00000042621	H2AFY,MYPT1,PDLIM7
GO:0048583	regulation of response to stimulus	5	326	0.0123	ENSGALP00000005161,ENSGALP00000010267,ENSGALP00000016629,ENSGALP00000022671,ENSGALP00000041772	H2AFY,NUDT16L1,PRDX1,S100A9,STAT3
GO:0006913	nucleocytoplasmic transport	2	25	0.0124	ENSGALP00000005161,ENSGALP00000042621	PDLIM7,STAT3
GO:0009168	purine ribonucleoside monophosphate biosynthetic process	2	25	0.0124	ENSGALP00000038677,ENSGALP00000043256	ALDOC,PGAM1
GO:0051726	regulation of cell cycle	3	94	0.0124	ENSGALP00000005161,ENSGALP00000010267,ENSGALP00000018410	H2AFY,STAT3,TOP2B
GO:0042221	response to chemical	5	331	0.0127	ENSGALP00000005161,ENSGALP00000016629,ENSGALP00000016789,ENSGALP00000017462,ENSGALP00000022671	HMGB2,MYPT1,PRDX1,S100A9,STAT3
GO:0090304	nucleic acid metabolic process	6	486	0.0129	ENSGALP00000005161,ENSGALP00000011718,ENSGALP00000017462,ENSGALP00000018410,ENSGALP00000026509,ENSGALP00000038408	DDX1,HMGB2,SNRPB,STAT3,TOP2B,YBX1
GO:1902905	positive regulation of supramolecular fiber organization	2	26	0.0129	ENSGALP00000002197,ENSGALP00000002383	GSN,RHOC
GO:0051495	positive regulation of cytoskeleton organization	2	27	0.0137	ENSGALP00000002197,ENSGALP00000002383	GSN,RHOC
GO:0006357	regulation of transcription by RNA polymerase II	4	208	0.0143	ENSGALP00000005161,ENSGALP00000010267,ENSGALP00000016789,ENSGALP00000017462	H2AFY,HMGB2,MYPT1,STAT3
GO:0050790	regulation of catalytic activity	4	208	0.0143	ENSGALP00000002383,ENSGALP00000005161,ENSGALP00000010267,ENSGALP00000016789	H2AFY,MYPT1,RHOC,STAT3
GO:1901700	response to oxygen-containing compound	3	101	0.0145	ENSGALP00000005161,ENSGALP00000016629,ENSGALP00000017462	HMGB2,PRDX1,STAT3
GO:0070887	cellular response to chemical stimulus	4	216	0.0159	ENSGALP00000005161,ENSGALP00000016629,ENSGALP00000016789,ENSGALP00000022671	MYPT1,PRDX1,S100A9,STAT3
GO:0035556	intracellular signal transduction	3	106	0.0162	ENSGALP00000002383,ENSGALP00000005161,ENSGALP00000019616	CAMK2D,RHOC,STAT3
GO:0006066	alcohol metabolic process	2	32	0.0177	ENSGALP00000003637,ENSGALP00000026550	APOB,SORD
GO:0046649	lymphocyte activation	2	34	0.0196	ENSGALP00000005161,ENSGALP00000016629	PRDX1,STAT3
GO:0030154	cell differentiation	5	376	0.0198	ENSGALP00000005161,ENSGALP00000019616,ENSGALP00000025681,ENSGALP00000027337,ENSGALP00000042621	CAMK2D,CTNNA2,LECT1,PDLIM7,STAT3
GO:0006954	inflammatory response	2	35	0.0204	ENSGALP00000005161,ENSGALP00000017462	HMGB2,STAT3
GO:0006259	DNA metabolic process	3	120	0.0215	ENSGALP00000017462,ENSGALP00000018410,ENSGALP00000026509	DDX1,HMGB2,TOP2B
GO:0042326	negative regulation of phosphorylation	2	37	0.0222	ENSGALP00000005161,ENSGALP00000010267	H2AFY,STAT3
GO:0007165	signal transduction	5	391	0.0226	ENSGALP00000002383,ENSGALP00000005161,ENSGALP00000016789,ENSGALP00000019616,ENSGALP00000040682	ANPEP,CAMK2D,MYPT1,RHOC,STAT3
GO:0006310	DNA recombination	2	38	0.0231	ENSGALP00000017462,ENSGALP00000018410	HMGB2,TOP2B
GO:0006417	regulation of translation	2	38	0.0231	ENSGALP00000005161,ENSGALP00000039068	EIF4G2,STAT3
GO:0045786	negative regulation of cell cycle	2	38	0.0231	ENSGALP00000010267,ENSGALP00000018410	H2AFY,TOP2B
GO:0048856	anatomical structure development	6	565	0.0235	ENSGALP00000002383,ENSGALP00000005161,ENSGALP00000019616,ENSGALP00000025681,ENSGALP00000027337,ENSGALP00000042621	CAMK2D,CTNNA2,LECT1,PDLIM7,RHOC,STAT3
GO:0051704	multi-organism process	3	126	0.0238	ENSGALP00000005161,ENSGALP00000017462,ENSGALP00000022671	HMGB2,S100A9,STAT3
GO:0016070	RNA metabolic process	5	403	0.0247	ENSGALP00000005161,ENSGALP00000011718,ENSGALP00000017462,ENSGALP00000026509,ENSGALP00000038408	DDX1,HMGB2,SNRPB,STAT3,YBX1
GO:0045934	negative regulation of nucleobase-containing compound metabolic process	3	128	0.0247	ENSGALP00000005161,ENSGALP00000010267,ENSGALP00000041772	H2AFY,NUDT16L1,STAT3
GO:0002252	immune effector process	2	41	0.0253	ENSGALP00000005161,ENSGALP00000016629	PRDX1,STAT3
GO:0061024	membrane organization	2	42	0.0263	ENSGALP00000011291,ENSGALP00000014280	APOOL,SEC23B
GO:0042325	regulation of phosphorylation	3	137	0.0282	ENSGALP00000005161,ENSGALP00000010267,ENSGALP00000016629	H2AFY,PRDX1,STAT3
GO:0007346	regulation of mitotic cell cycle	2	45	0.0292	ENSGALP00000010267,ENSGALP00000018410	H2AFY,TOP2B
GO:0080135	regulation of cellular response to stress	2	50	0.0345	ENSGALP00000016629,ENSGALP00000041772	NUDT16L1,PRDX1
GO:0031329	regulation of cellular catabolic process	2	51	0.0356	ENSGALP00000005161,ENSGALP00000038677	PGAM1,STAT3
GO:1903047	mitotic cell cycle process	2	52	0.0368	ENSGALP00000002383,ENSGALP00000018410	RHOC,TOP2B
GO:0098542	defense response to other organism	2	54	0.0393	ENSGALP00000017462,ENSGALP00000022671	HMGB2,S100A9
GO:0009888	tissue development	3	159	0.04	ENSGALP00000002383,ENSGALP00000025681,ENSGALP00000027337	CTNNA2,LECT1,RHOC
GO:0006351	transcription, DNA-templated	4	302	0.0411	ENSGALP00000005161,ENSGALP00000017462,ENSGALP00000026509,ENSGALP00000038408	DDX1,HMGB2,STAT3,YBX1
GO:0008283	cell population proliferation	2	58	0.044	ENSGALP00000005161,ENSGALP00000016629	PRDX1,STAT3
GO:0030334	regulation of cell migration	2	58	0.044	ENSGALP00000002383,ENSGALP00000005161	RHOC,STAT3
GO:0031399	regulation of protein modification process	3	168	0.0451	ENSGALP00000010267,ENSGALP00000016629,ENSGALP00000016789	H2AFY,MYPT1,PRDX1
GO:0060341	regulation of cellular localization	2	61	0.0477	ENSGALP00000010267,ENSGALP00000016789	H2AFY,MYPT1

## Sheet: GO C2-down DOH
Gene Ontology Terms with downregulated proteins in C2 treatment at Day of hatch (DOH)
#term ID	term description	observed gene count	background gene count	false discovery rate	matching proteins in your network (IDs)	matching proteins in your network (labels)
GO:0009987	cellular process	12	1590	4.63e-07	ENSGALP00000001688,ENSGALP00000005212,ENSGALP00000007526,ENSGALP00000011467,ENSGALP00000012938,ENSGALP00000013294,ENSGALP00000013968,ENSGALP00000016523,ENSGALP00000017367,ENSGALP00000017553,ENSGALP00000024396,ENSGALP00000041062	ALDH1A1,API5,BZW2,EEF1B2,HDAC1,HSP90AB1,KDELR2,MAGOH2,MYO1A,NT5C2,SH3GL1,TPM2
GO:0006810	transport	5	331	0.0022	ENSGALP00000001688,ENSGALP00000002373,ENSGALP00000007526,ENSGALP00000011467,ENSGALP00000017367	ATP2A3,KDELR2,MAGOH2,MYO1A,SH3GL1
GO:0016192	vesicle-mediated transport	3	92	0.0063	ENSGALP00000001688,ENSGALP00000007526,ENSGALP00000011467	KDELR2,MYO1A,SH3GL1
GO:0008152	metabolic process	6	1070	0.0214	ENSGALP00000002822,ENSGALP00000005212,ENSGALP00000013294,ENSGALP00000013968,ENSGALP00000017367,ENSGALP00000024396	ALDH1A1,EEF1B2,GLYR1,HDAC1,MAGOH2,NT5C2
GO:0051641	cellular localization	3	163	0.0233	ENSGALP00000001688,ENSGALP00000007526,ENSGALP00000011467	KDELR2,MYO1A,SH3GL1

## Sheet: GO L-up 10d
Gene Ontology Terms with upregulated proteins in L treatment at 10 days of age
#term ID	term description	observed gene count	background gene count	false discovery rate	matching proteins in your network (IDs)	matching proteins in your network (labels)
GO:0009987	cellular process	19	1590	4.06e-12	ENSGALP00000001866,ENSGALP00000003373,ENSGALP00000004034,ENSGALP00000007204,ENSGALP00000010210,ENSGALP00000013964,ENSGALP00000016363,ENSGALP00000016918,ENSGALP00000017367,ENSGALP00000018042,ENSGALP00000018742,ENSGALP00000019110,ENSGALP00000023720,ENSGALP00000023976,ENSGALP00000027541,ENSGALP00000041604,ENSGALP00000041620,ENSGALP00000041886,ENSGALP00000041913	ACTA1,ARF6,ASL2,CKB,EIF2A,HMGB1,HP1BP3,KIF2A,LECT2,MAGOH2,MYL9,PDCD10,PELO,PLOD1,RPS17L,SAMHD1,TUBB3,UBA5,UQCRFS1
GO:0006996	organelle organization	10	345	2.27e-08	ENSGALP00000003373,ENSGALP00000013964,ENSGALP00000016363,ENSGALP00000016918,ENSGALP00000018042,ENSGALP00000023720,ENSGALP00000027541,ENSGALP00000041604,ENSGALP00000041620,ENSGALP00000041913	ACTA1,ARF6,EIF2A,HMGB1,HP1BP3,KIF2A,MYL9,PDCD10,RPS17L,TUBB3
GO:0022607	cellular component assembly	8	234	5.48e-07	ENSGALP00000003373,ENSGALP00000016363,ENSGALP00000016918,ENSGALP00000018042,ENSGALP00000027541,ENSGALP00000041604,ENSGALP00000041620,ENSGALP00000041913	ACTA1,ARF6,EIF2A,HMGB1,HP1BP3,MYL9,PDCD10,RPS17L
GO:0007010	cytoskeleton organization	5	117	0.00013	ENSGALP00000013964,ENSGALP00000018042,ENSGALP00000023720,ENSGALP00000041604,ENSGALP00000041913	ACTA1,ARF6,KIF2A,MYL9,TUBB3
GO:0044237	cellular metabolic process	10	988	0.00013	ENSGALP00000001866,ENSGALP00000003373,ENSGALP00000004034,ENSGALP00000007204,ENSGALP00000016918,ENSGALP00000017367,ENSGALP00000018742,ENSGALP00000019110,ENSGALP00000027541,ENSGALP00000041886	ASL2,CKB,EIF2A,HMGB1,MAGOH2,PLOD1,RPS17L,SAMHD1,UBA5,UQCRFS1
GO:0070925	organelle assembly	4	71	0.00044	ENSGALP00000003373,ENSGALP00000016918,ENSGALP00000018042,ENSGALP00000041913	ACTA1,EIF2A,MYL9,RPS17L
GO:0006807	nitrogen compound metabolic process	9	930	0.00048	ENSGALP00000001866,ENSGALP00000003373,ENSGALP00000004034,ENSGALP00000007204,ENSGALP00000016918,ENSGALP00000017367,ENSGALP00000018742,ENSGALP00000019110,ENSGALP00000027541	ASL2,CKB,EIF2A,HMGB1,MAGOH2,PLOD1,RPS17L,SAMHD1,UBA5
GO:0044238	primary metabolic process	9	971	0.00063	ENSGALP00000001866,ENSGALP00000003373,ENSGALP00000004034,ENSGALP00000007204,ENSGALP00000016918,ENSGALP00000017367,ENSGALP00000018742,ENSGALP00000019110,ENSGALP00000027541	ASL2,CKB,EIF2A,HMGB1,MAGOH2,PLOD1,RPS17L,SAMHD1,UBA5
GO:0048583	regulation of response to stimulus	6	326	0.00063	ENSGALP00000001866,ENSGALP00000023976,ENSGALP00000027541,ENSGALP00000032688,ENSGALP00000041604,ENSGALP00000041620	ARF6,HMGB1,PDCD10,PELO,PPP4R2,SAMHD1
GO:0071704	organic substance metabolic process	9	1008	0.00073	ENSGALP00000001866,ENSGALP00000003373,ENSGALP00000004034,ENSGALP00000007204,ENSGALP00000016918,ENSGALP00000017367,ENSGALP00000018742,ENSGALP00000019110,ENSGALP00000027541	ASL2,CKB,EIF2A,HMGB1,MAGOH2,PLOD1,RPS17L,SAMHD1,UBA5
GO:1901564	organonitrogen compound metabolic process	7	534	0.00074	ENSGALP00000001866,ENSGALP00000003373,ENSGALP00000004034,ENSGALP00000007204,ENSGALP00000016918,ENSGALP00000018742,ENSGALP00000019110	ASL2,CKB,EIF2A,PLOD1,RPS17L,SAMHD1,UBA5
GO:0043537	negative regulation of blood vessel endothelial cell migration	2	2	0.00077	ENSGALP00000027541,ENSGALP00000041620	HMGB1,PDCD10
GO:0080134	regulation of response to stress	4	96	0.00082	ENSGALP00000001866,ENSGALP00000027541,ENSGALP00000032688,ENSGALP00000041620	HMGB1,PDCD10,PPP4R2,SAMHD1
GO:0048856	anatomical structure development	7	565	0.00088	ENSGALP00000010210,ENSGALP00000018042,ENSGALP00000023720,ENSGALP00000027541,ENSGALP00000041604,ENSGALP00000041620,ENSGALP00000041913	ACTA1,ARF6,HMGB1,KIF2A,LECT2,MYL9,PDCD10
GO:0030154	cell differentiation	6	376	0.00093	ENSGALP00000010210,ENSGALP00000018042,ENSGALP00000023720,ENSGALP00000027541,ENSGALP00000041604,ENSGALP00000041913	ACTA1,ARF6,HMGB1,KIF2A,LECT2,MYL9
GO:0032268	regulation of cellular protein metabolic process	5	241	0.0012	ENSGALP00000016918,ENSGALP00000023976,ENSGALP00000027541,ENSGALP00000032688,ENSGALP00000041620	EIF2A,HMGB1,PDCD10,PELO,PPP4R2
GO:0048731	system development	6	412	0.0012	ENSGALP00000010210,ENSGALP00000018042,ENSGALP00000023720,ENSGALP00000027541,ENSGALP00000041604,ENSGALP00000041620	ACTA1,ARF6,HMGB1,KIF2A,LECT2,PDCD10
GO:0002376	immune system process	4	140	0.0021	ENSGALP00000001866,ENSGALP00000003846,ENSGALP00000010210,ENSGALP00000027541	AVD,HMGB1,LECT2,SAMHD1
GO:0080135	regulation of cellular response to stress	3	50	0.0022	ENSGALP00000027541,ENSGALP00000032688,ENSGALP00000041620	HMGB1,PDCD10,PPP4R2
GO:1903670	regulation of sprouting angiogenesis	2	7	0.0024	ENSGALP00000027541,ENSGALP00000041620	HMGB1,PDCD10
GO:0030036	actin cytoskeleton organization	3	58	0.0031	ENSGALP00000018042,ENSGALP00000041604,ENSGALP00000041913	ACTA1,ARF6,MYL9
GO:0019220	regulation of phosphate metabolic process	4	164	0.0032	ENSGALP00000023976,ENSGALP00000027541,ENSGALP00000032688,ENSGALP00000041620	HMGB1,PDCD10,PELO,PPP4R2
GO:0031399	regulation of protein modification process	4	168	0.0032	ENSGALP00000023976,ENSGALP00000027541,ENSGALP00000032688,ENSGALP00000041620	HMGB1,PDCD10,PELO,PPP4R2
GO:0032874	positive regulation of stress-activated MAPK cascade	2	9	0.0032	ENSGALP00000027541,ENSGALP00000041620	HMGB1,PDCD10
GO:0042255	ribosome assembly	2	10	0.0034	ENSGALP00000003373,ENSGALP00000016918	EIF2A,RPS17L
GO:1901566	organonitrogen compound biosynthetic process	4	177	0.0035	ENSGALP00000003373,ENSGALP00000004034,ENSGALP00000016918,ENSGALP00000018742	ASL2,CKB,EIF2A,RPS17L
GO:0032880	regulation of protein localization	3	68	0.0037	ENSGALP00000027541,ENSGALP00000041604,ENSGALP00000041620	ARF6,HMGB1,PDCD10
GO:0050789	regulation of biological process	8	1114	0.0039	ENSGALP00000001866,ENSGALP00000016363,ENSGALP00000016918,ENSGALP00000023976,ENSGALP00000027541,ENSGALP00000032688,ENSGALP00000041604,ENSGALP00000041620	ARF6,EIF2A,HMGB1,HP1BP3,PDCD10,PELO,PPP4R2,SAMHD1
GO:0001936	regulation of endothelial cell proliferation	2	12	0.0042	ENSGALP00000027541,ENSGALP00000041620	HMGB1,PDCD10
GO:0043666	regulation of phosphoprotein phosphatase activity	2	14	0.0054	ENSGALP00000023976,ENSGALP00000032688	PELO,PPP4R2
GO:0050790	regulation of catalytic activity	4	208	0.0056	ENSGALP00000023976,ENSGALP00000027541,ENSGALP00000032688,ENSGALP00000041620	HMGB1,PDCD10,PELO,PPP4R2
GO:0051171	regulation of nitrogen compound metabolic process	6	625	0.0057	ENSGALP00000016363,ENSGALP00000016918,ENSGALP00000023976,ENSGALP00000027541,ENSGALP00000032688,ENSGALP00000041620	EIF2A,HMGB1,HP1BP3,PDCD10,PELO,PPP4R2
GO:0034641	cellular nitrogen compound metabolic process	6	630	0.0058	ENSGALP00000001866,ENSGALP00000003373,ENSGALP00000016918,ENSGALP00000017367,ENSGALP00000018742,ENSGALP00000027541	CKB,EIF2A,HMGB1,MAGOH2,RPS17L,SAMHD1
GO:0006955	immune response	3	90	0.0059	ENSGALP00000001866,ENSGALP00000003846,ENSGALP00000027541	AVD,HMGB1,SAMHD1
GO:0030239	myofibril assembly	2	16	0.0059	ENSGALP00000018042,ENSGALP00000041913	ACTA1,MYL9
GO:0031323	regulation of cellular metabolic process	6	645	0.0059	ENSGALP00000016363,ENSGALP00000016918,ENSGALP00000023976,ENSGALP00000027541,ENSGALP00000032688,ENSGALP00000041620	EIF2A,HMGB1,HP1BP3,PDCD10,PELO,PPP4R2
GO:0060255	regulation of macromolecule metabolic process	6	645	0.0059	ENSGALP00000016363,ENSGALP00000016918,ENSGALP00000023976,ENSGALP00000027541,ENSGALP00000032688,ENSGALP00000041620	EIF2A,HMGB1,HP1BP3,PDCD10,PELO,PPP4R2
GO:0080090	regulation of primary metabolic process	6	634	0.0059	ENSGALP00000016363,ENSGALP00000016918,ENSGALP00000023976,ENSGALP00000027541,ENSGALP00000032688,ENSGALP00000041620	EIF2A,HMGB1,HP1BP3,PDCD10,PELO,PPP4R2
GO:0006282	regulation of DNA repair	2	18	0.0063	ENSGALP00000027541,ENSGALP00000032688	HMGB1,PPP4R2
GO:0045088	regulation of innate immune response	2	18	0.0063	ENSGALP00000001866,ENSGALP00000027541	HMGB1,SAMHD1
GO:0046677	response to antibiotic	2	18	0.0063	ENSGALP00000010210,ENSGALP00000041620	LECT2,PDCD10
GO:0006952	defense response	3	103	0.0072	ENSGALP00000001866,ENSGALP00000003846,ENSGALP00000027541	AVD,HMGB1,SAMHD1
GO:1903829	positive regulation of cellular protein localization	2	21	0.0072	ENSGALP00000041604,ENSGALP00000041620	ARF6,PDCD10
GO:0045937	positive regulation of phosphate metabolic process	3	106	0.0075	ENSGALP00000023976,ENSGALP00000027541,ENSGALP00000041620	HMGB1,PDCD10,PELO
GO:0048646	anatomical structure formation involved in morphogenesis	3	106	0.0075	ENSGALP00000018042,ENSGALP00000041620,ENSGALP00000041913	ACTA1,MYL9,PDCD10
GO:0050896	response to stimulus	6	718	0.0075	ENSGALP00000001866,ENSGALP00000003846,ENSGALP00000010210,ENSGALP00000023976,ENSGALP00000027541,ENSGALP00000041620	AVD,HMGB1,LECT2,PDCD10,PELO,SAMHD1
GO:0031401	positive regulation of protein modification process	3	111	0.0076	ENSGALP00000023976,ENSGALP00000027541,ENSGALP00000041620	HMGB1,PDCD10,PELO
GO:0034622	cellular protein-containing complex assembly	3	110	0.0076	ENSGALP00000003373,ENSGALP00000016363,ENSGALP00000016918	EIF2A,HP1BP3,RPS17L
GO:0009966	regulation of signal transduction	4	265	0.0077	ENSGALP00000023976,ENSGALP00000027541,ENSGALP00000041604,ENSGALP00000041620	ARF6,HMGB1,PDCD10,PELO
GO:0043085	positive regulation of catalytic activity	3	113	0.0078	ENSGALP00000023976,ENSGALP00000027541,ENSGALP00000041620	HMGB1,PDCD10,PELO
GO:0051336	regulation of hydrolase activity	3	115	0.008	ENSGALP00000023976,ENSGALP00000027541,ENSGALP00000032688	HMGB1,PELO,PPP4R2
GO:0006928	movement of cell or subcellular component	3	118	0.0081	ENSGALP00000023720,ENSGALP00000027541,ENSGALP00000041620	HMGB1,KIF2A,PDCD10
GO:0048513	animal organ development	4	272	0.0081	ENSGALP00000010210,ENSGALP00000018042,ENSGALP00000027541,ENSGALP00000041604	ACTA1,ARF6,HMGB1,LECT2
GO:0050794	regulation of cellular process	7	1051	0.0081	ENSGALP00000016363,ENSGALP00000016918,ENSGALP00000023976,ENSGALP00000027541,ENSGALP00000032688,ENSGALP00000041604,ENSGALP00000041620	ARF6,EIF2A,HMGB1,HP1BP3,PDCD10,PELO,PPP4R2
GO:0051222	positive regulation of protein transport	2	25	0.0081	ENSGALP00000027541,ENSGALP00000041620	HMGB1,PDCD10
GO:0031497	chromatin assembly	2	27	0.0087	ENSGALP00000016363,ENSGALP00000027541	HMGB1,HP1BP3
GO:0006950	response to stress	4	302	0.0103	ENSGALP00000001866,ENSGALP00000003846,ENSGALP00000027541,ENSGALP00000041620	AVD,HMGB1,PDCD10,SAMHD1
GO:0071705	nitrogen compound transport	3	136	0.0107	ENSGALP00000017367,ENSGALP00000027541,ENSGALP00000041604	ARF6,HMGB1,MAGOH2
GO:0002521	leukocyte differentiation	2	33	0.011	ENSGALP00000010210,ENSGALP00000027541	HMGB1,LECT2
GO:0043170	macromolecule metabolic process	6	825	0.0111	ENSGALP00000003373,ENSGALP00000007204,ENSGALP00000016918,ENSGALP00000017367,ENSGALP00000019110,ENSGALP00000027541	EIF2A,HMGB1,MAGOH2,PLOD1,RPS17L,UBA5
GO:0044249	cellular biosynthetic process	5	548	0.0111	ENSGALP00000001866,ENSGALP00000003373,ENSGALP00000004034,ENSGALP00000016918,ENSGALP00000018742	ASL2,CKB,EIF2A,RPS17L,SAMHD1
GO:1902531	regulation of intracellular signal transduction	3	143	0.0114	ENSGALP00000027541,ENSGALP00000041604,ENSGALP00000041620	ARF6,HMGB1,PDCD10
GO:1901576	organic substance biosynthetic process	5	556	0.0115	ENSGALP00000001866,ENSGALP00000003373,ENSGALP00000004034,ENSGALP00000016918,ENSGALP00000018742	ASL2,CKB,EIF2A,RPS17L,SAMHD1
GO:0009144	purine nucleoside triphosphate metabolic process	2	36	0.0121	ENSGALP00000001866,ENSGALP00000018742	CKB,SAMHD1
GO:0030335	positive regulation of cell migration	2	37	0.0123	ENSGALP00000027541,ENSGALP00000041620	HMGB1,PDCD10
GO:0009605	response to external stimulus	3	154	0.013	ENSGALP00000001866,ENSGALP00000003846,ENSGALP00000027541	AVD,HMGB1,SAMHD1
GO:0042127	regulation of cell population proliferation	3	154	0.013	ENSGALP00000023976,ENSGALP00000027541,ENSGALP00000041620	HMGB1,PDCD10,PELO
GO:0051234	establishment of localization	4	341	0.013	ENSGALP00000017367,ENSGALP00000027541,ENSGALP00000041604,ENSGALP00000041620	ARF6,HMGB1,MAGOH2,PDCD10
GO:0002252	immune effector process	2	41	0.0138	ENSGALP00000001866,ENSGALP00000027541	HMGB1,SAMHD1
GO:0071702	organic substance transport	3	165	0.0143	ENSGALP00000017367,ENSGALP00000027541,ENSGALP00000041604	ARF6,HMGB1,MAGOH2
GO:0044281	small molecule metabolic process	3	168	0.0149	ENSGALP00000001866,ENSGALP00000004034,ENSGALP00000018742	ASL2,CKB,SAMHD1
GO:0043254	regulation of protein complex assembly	2	44	0.015	ENSGALP00000027541,ENSGALP00000041604	ARF6,HMGB1
GO:0044267	cellular protein metabolic process	4	366	0.0151	ENSGALP00000003373,ENSGALP00000007204,ENSGALP00000016918,ENSGALP00000019110	EIF2A,PLOD1,RPS17L,UBA5
GO:0045860	positive regulation of protein kinase activity	2	48	0.0171	ENSGALP00000027541,ENSGALP00000041620	HMGB1,PDCD10
GO:0033036	macromolecule localization	3	181	0.0174	ENSGALP00000017367,ENSGALP00000027541,ENSGALP00000041604	ARF6,HMGB1,MAGOH2
GO:2000026	regulation of multicellular organismal development	3	183	0.0177	ENSGALP00000027541,ENSGALP00000041604,ENSGALP00000041620	ARF6,HMGB1,PDCD10
GO:0006163	purine nucleotide metabolic process	2	50	0.0179	ENSGALP00000001866,ENSGALP00000018742	CKB,SAMHD1
GO:0006412	translation	2	52	0.0189	ENSGALP00000003373,ENSGALP00000016918	EIF2A,RPS17L
GO:0045087	innate immune response	2	52	0.0189	ENSGALP00000001866,ENSGALP00000027541	HMGB1,SAMHD1
GO:0098542	defense response to other organism	2	54	0.0196	ENSGALP00000001866,ENSGALP00000003846	AVD,SAMHD1
GO:0051345	positive regulation of hydrolase activity	2	58	0.0216	ENSGALP00000023976,ENSGALP00000027541	HMGB1,PELO
GO:0044271	cellular nitrogen compound biosynthetic process	4	431	0.0226	ENSGALP00000001866,ENSGALP00000003373,ENSGALP00000016918,ENSGALP00000018742	CKB,EIF2A,RPS17L,SAMHD1
GO:0007017	microtubule-based process	2	61	0.0229	ENSGALP00000013964,ENSGALP00000023720	KIF2A,TUBB3
GO:0048522	positive regulation of cellular process	4	434	0.0229	ENSGALP00000023976,ENSGALP00000027541,ENSGALP00000041604,ENSGALP00000041620	ARF6,HMGB1,PDCD10,PELO
GO:0008285	negative regulation of cell population proliferation	2	62	0.0231	ENSGALP00000023976,ENSGALP00000041620	PDCD10,PELO
GO:0044283	small molecule biosynthetic process	2	62	0.0231	ENSGALP00000001866,ENSGALP00000004034	ASL2,SAMHD1
GO:0044260	cellular macromolecule metabolic process	5	721	0.0234	ENSGALP00000003373,ENSGALP00000007204,ENSGALP00000016918,ENSGALP00000019110,ENSGALP00000027541	EIF2A,HMGB1,PLOD1,RPS17L,UBA5
GO:0006518	peptide metabolic process	2	65	0.0246	ENSGALP00000003373,ENSGALP00000016918	EIF2A,RPS17L
GO:0048519	negative regulation of biological process	4	453	0.0249	ENSGALP00000023976,ENSGALP00000027541,ENSGALP00000041604,ENSGALP00000041620	ARF6,HMGB1,PDCD10,PELO
GO:0016477	cell migration	2	72	0.0284	ENSGALP00000027541,ENSGALP00000041620	HMGB1,PDCD10
GO:0006915	apoptotic process	2	76	0.0296	ENSGALP00000041604,ENSGALP00000041620	ARF6,PDCD10
GO:0010468	regulation of gene expression	4	503	0.0324	ENSGALP00000016363,ENSGALP00000016918,ENSGALP00000027541,ENSGALP00000041620	EIF2A,HMGB1,HP1BP3,PDCD10
GO:0008284	positive regulation of cell population proliferation	2	84	0.0348	ENSGALP00000027541,ENSGALP00000041620	HMGB1,PDCD10
GO:0051093	negative regulation of developmental process	2	85	0.035	ENSGALP00000027541,ENSGALP00000041620	HMGB1,PDCD10
GO:0035295	tube development	2	90	0.0387	ENSGALP00000027541,ENSGALP00000041620	HMGB1,PDCD10
GO:0016192	vesicle-mediated transport	2	92	0.0399	ENSGALP00000027541,ENSGALP00000041604	ARF6,HMGB1
GO:0006139	nucleobase-containing compound metabolic process	4	553	0.0413	ENSGALP00000001866,ENSGALP00000017367,ENSGALP00000018742,ENSGALP00000027541	CKB,HMGB1,MAGOH2,SAMHD1
GO:0055114	oxidation-reduction process	2	102	0.0458	ENSGALP00000007204,ENSGALP00000041886	PLOD1,UQCRFS1

## Sheet: GO L-down 10d
Gene Ontology Terms with downregulated proteins in L treatment at 10 days of age
#term ID	term description	observed gene count	background gene count	false discovery rate	matching proteins in your network (IDs)	matching proteins in your network (labels)
GO:0009987	cellular process	23	1590	1.6e-14	ENSGALP00000002366,ENSGALP00000003263,ENSGALP00000006620,ENSGALP00000006885,ENSGALP00000007526,ENSGALP00000009681,ENSGALP00000010405,ENSGALP00000011389,ENSGALP00000013355,ENSGALP00000013585,ENSGALP00000014144,ENSGALP00000014260,ENSGALP00000018708,ENSGALP00000020445,ENSGALP00000023936,ENSGALP00000026345,ENSGALP00000034078,ENSGALP00000035658,ENSGALP00000038677,ENSGALP00000039379,ENSGALP00000039731,…	ACAP2,ACE,ACP1,ACTR2,ADA,AGRN,CHMP4B,CKMT1A,CNOT10,HMGCS1,MOV10,MYH9,MYO1A,NME2,P4HA1,PDLIM4,PGAM1,PSMA1,PSPC1,RPL30,TARDBP,TF,XDH
GO:0008152	metabolic process	20	1070	4.25e-14	ENSGALP00000002366,ENSGALP00000003263,ENSGALP00000006620,ENSGALP00000006885,ENSGALP00000008475,ENSGALP00000009681,ENSGALP00000013355,ENSGALP00000013585,ENSGALP00000014144,ENSGALP00000017306,ENSGALP00000018708,ENSGALP00000020445,ENSGALP00000023936,ENSGALP00000026345,ENSGALP00000029849,ENSGALP00000034078,ENSGALP00000035658,ENSGALP00000038677,ENSGALP00000039731,ENSGALP00000042272	ACE,ACP1,ADA,CHMP4B,CKMT1A,CNOT10,CYB5R2,HMGCS1,MOV10,MYH9,NME2,P4HA1,PGAM1,PRSS2,PSMA1,PSPC1,RPL30,SCP2,TARDBP,XDH
GO:0044238	primary metabolic process	18	971	2.78e-12	ENSGALP00000002366,ENSGALP00000003263,ENSGALP00000006620,ENSGALP00000006885,ENSGALP00000008475,ENSGALP00000009681,ENSGALP00000013355,ENSGALP00000014144,ENSGALP00000018708,ENSGALP00000020445,ENSGALP00000023936,ENSGALP00000026345,ENSGALP00000029849,ENSGALP00000034078,ENSGALP00000035658,ENSGALP00000038677,ENSGALP00000039731,ENSGALP00000042272	ACE,ACP1,ADA,CHMP4B,CNOT10,CYB5R2,HMGCS1,MOV10,MYH9,NME2,P4HA1,PGAM1,PRSS2,PSMA1,PSPC1,RPL30,TARDBP,XDH
GO:0071704	organic substance metabolic process	18	1008	3.94e-12	ENSGALP00000002366,ENSGALP00000003263,ENSGALP00000006620,ENSGALP00000006885,ENSGALP00000008475,ENSGALP00000009681,ENSGALP00000013355,ENSGALP00000014144,ENSGALP00000018708,ENSGALP00000020445,ENSGALP00000023936,ENSGALP00000026345,ENSGALP00000029849,ENSGALP00000034078,ENSGALP00000035658,ENSGALP00000038677,ENSGALP00000039731,ENSGALP00000042272	ACE,ACP1,ADA,CHMP4B,CNOT10,CYB5R2,HMGCS1,MOV10,MYH9,NME2,P4HA1,PGAM1,PRSS2,PSMA1,PSPC1,RPL30,TARDBP,XDH
GO:0006807	nitrogen compound metabolic process	16	930	3.22e-10	ENSGALP00000002366,ENSGALP00000003263,ENSGALP00000006620,ENSGALP00000006885,ENSGALP00000009681,ENSGALP00000013355,ENSGALP00000014144,ENSGALP00000018708,ENSGALP00000020445,ENSGALP00000026345,ENSGALP00000029849,ENSGALP00000034078,ENSGALP00000035658,ENSGALP00000038677,ENSGALP00000039731,ENSGALP00000042272	ACE,ACP1,ADA,CHMP4B,CNOT10,MOV10,MYH9,NME2,P4HA1,PGAM1,PRSS2,PSMA1,PSPC1,RPL30,TARDBP,XDH
GO:0044237	cellular metabolic process	15	988	1.03e-08	ENSGALP00000002366,ENSGALP00000003263,ENSGALP00000006620,ENSGALP00000006885,ENSGALP00000009681,ENSGALP00000013355,ENSGALP00000013585,ENSGALP00000014144,ENSGALP00000018708,ENSGALP00000023936,ENSGALP00000026345,ENSGALP00000034078,ENSGALP00000035658,ENSGALP00000038677,ENSGALP00000042272	ACP1,ADA,CHMP4B,CKMT1A,CNOT10,HMGCS1,MOV10,NME2,P4HA1,PGAM1,PSMA1,PSPC1,RPL30,TARDBP,XDH
GO:1901564	organonitrogen compound metabolic process	12	534	1.72e-08	ENSGALP00000003263,ENSGALP00000006620,ENSGALP00000006885,ENSGALP00000009681,ENSGALP00000013355,ENSGALP00000014144,ENSGALP00000020445,ENSGALP00000026345,ENSGALP00000029849,ENSGALP00000034078,ENSGALP00000038677,ENSGALP00000039731	ACE,ACP1,ADA,CHMP4B,MYH9,NME2,P4HA1,PGAM1,PRSS2,PSMA1,RPL30,XDH
GO:0002376	immune system process	7	140	9.82e-07	ENSGALP00000006620,ENSGALP00000010405,ENSGALP00000013355,ENSGALP00000014260,ENSGALP00000020445,ENSGALP00000035658,ENSGALP00000039731	ACE,ACTR2,ADA,MYH9,PSPC1,RPL30,TF
GO:0065007	biological regulation	14	1189	1.01e-06	ENSGALP00000002366,ENSGALP00000003263,ENSGALP00000006620,ENSGALP00000010405,ENSGALP00000011389,ENSGALP00000014260,ENSGALP00000018708,ENSGALP00000020445,ENSGALP00000034078,ENSGALP00000035658,ENSGALP00000038677,ENSGALP00000039379,ENSGALP00000039731,ENSGALP00000042272	ACAP2,ACE,ACTR2,ADA,AGRN,CHMP4B,CNOT10,MOV10,MYH9,NME2,PGAM1,PSPC1,TARDBP,TF
GO:0043170	macromolecule metabolic process	12	825	1.53e-06	ENSGALP00000002366,ENSGALP00000003263,ENSGALP00000006885,ENSGALP00000009681,ENSGALP00000013355,ENSGALP00000018708,ENSGALP00000020445,ENSGALP00000026345,ENSGALP00000029849,ENSGALP00000035658,ENSGALP00000039731,ENSGALP00000042272	ACE,ACP1,CHMP4B,CNOT10,MOV10,MYH9,P4HA1,PRSS2,PSMA1,PSPC1,RPL30,TARDBP
GO:0051641	cellular localization	7	163	1.96e-06	ENSGALP00000002839,ENSGALP00000003263,ENSGALP00000007526,ENSGALP00000010405,ENSGALP00000011389,ENSGALP00000014260,ENSGALP00000039379	ACAP2,ACTR2,AGRN,CHMP4B,MYO1A,TF,XPO7
GO:1901362	organic cyclic compound biosynthetic process	9	385	2.32e-06	ENSGALP00000006620,ENSGALP00000008475,ENSGALP00000014144,ENSGALP00000018708,ENSGALP00000023936,ENSGALP00000034078,ENSGALP00000035658,ENSGALP00000038677,ENSGALP00000042272	ADA,CNOT10,CYB5R2,HMGCS1,NME2,PGAM1,PSPC1,TARDBP,XDH
GO:1901576	organic substance biosynthetic process	10	556	3.58e-06	ENSGALP00000006620,ENSGALP00000008475,ENSGALP00000013355,ENSGALP00000014144,ENSGALP00000018708,ENSGALP00000023936,ENSGALP00000034078,ENSGALP00000035658,ENSGALP00000038677,ENSGALP00000042272	ADA,CNOT10,CYB5R2,HMGCS1,NME2,PGAM1,PSPC1,RPL30,TARDBP,XDH
GO:0051179	localization	9	423	4.09e-06	ENSGALP00000002839,ENSGALP00000003263,ENSGALP00000007526,ENSGALP00000010405,ENSGALP00000011389,ENSGALP00000014260,ENSGALP00000017306,ENSGALP00000020445,ENSGALP00000039379	ACAP2,ACTR2,AGRN,CHMP4B,MYH9,MYO1A,SCP2,TF,XPO7
GO:1901360	organic cyclic compound metabolic process	10	594	5.35e-06	ENSGALP00000002366,ENSGALP00000006620,ENSGALP00000008475,ENSGALP00000014144,ENSGALP00000018708,ENSGALP00000023936,ENSGALP00000034078,ENSGALP00000035658,ENSGALP00000038677,ENSGALP00000042272	ADA,CNOT10,CYB5R2,HMGCS1,MOV10,NME2,PGAM1,PSPC1,TARDBP,XDH
GO:0030029	actin filament-based process	5	62	7.78e-06	ENSGALP00000007526,ENSGALP00000014260,ENSGALP00000020445,ENSGALP00000039379,ENSGALP00000042746	ACTR2,AGRN,MYH9,MYO1A,PDLIM4
GO:0044283	small molecule biosynthetic process	5	62	7.78e-06	ENSGALP00000006620,ENSGALP00000014144,ENSGALP00000023936,ENSGALP00000034078,ENSGALP00000038677	ADA,HMGCS1,NME2,PGAM1,XDH
GO:0072522	purine-containing compound biosynthetic process	4	31	2.35e-05	ENSGALP00000006620,ENSGALP00000014144,ENSGALP00000034078,ENSGALP00000038677	ADA,NME2,PGAM1,XDH
GO:0006508	proteolysis	5	82	2.46e-05	ENSGALP00000003263,ENSGALP00000009681,ENSGALP00000020445,ENSGALP00000029849,ENSGALP00000039731	ACE,CHMP4B,MYH9,PRSS2,PSMA1
GO:0044249	cellular biosynthetic process	9	548	2.51e-05	ENSGALP00000006620,ENSGALP00000013355,ENSGALP00000014144,ENSGALP00000018708,ENSGALP00000023936,ENSGALP00000034078,ENSGALP00000035658,ENSGALP00000038677,ENSGALP00000042272	ADA,CNOT10,HMGCS1,NME2,PGAM1,PSPC1,RPL30,TARDBP,XDH
GO:0019538	protein metabolic process	8	412	3.32e-05	ENSGALP00000003263,ENSGALP00000006885,ENSGALP00000009681,ENSGALP00000013355,ENSGALP00000020445,ENSGALP00000026345,ENSGALP00000029849,ENSGALP00000039731	ACE,ACP1,CHMP4B,MYH9,P4HA1,PRSS2,PSMA1,RPL30
GO:0000910	cytokinesis	3	8	3.63e-05	ENSGALP00000003263,ENSGALP00000014260,ENSGALP00000020445	ACTR2,CHMP4B,MYH9
GO:0033036	macromolecule localization	6	181	4.24e-05	ENSGALP00000002839,ENSGALP00000003263,ENSGALP00000011389,ENSGALP00000017306,ENSGALP00000020445,ENSGALP00000039379	ACAP2,AGRN,CHMP4B,MYH9,SCP2,XPO7
GO:0044271	cellular nitrogen compound biosynthetic process	8	431	4.24e-05	ENSGALP00000006620,ENSGALP00000013355,ENSGALP00000014144,ENSGALP00000018708,ENSGALP00000034078,ENSGALP00000035658,ENSGALP00000038677,ENSGALP00000042272	ADA,CNOT10,NME2,PGAM1,PSPC1,RPL30,TARDBP,XDH
GO:0031532	actin cytoskeleton reorganization	3	9	4.28e-05	ENSGALP00000020445,ENSGALP00000039379,ENSGALP00000042746	AGRN,MYH9,PDLIM4
GO:0034641	cellular nitrogen compound metabolic process	9	630	6.11e-05	ENSGALP00000002366,ENSGALP00000006620,ENSGALP00000013355,ENSGALP00000014144,ENSGALP00000018708,ENSGALP00000034078,ENSGALP00000035658,ENSGALP00000038677,ENSGALP00000042272	ADA,CNOT10,MOV10,NME2,PGAM1,PSPC1,RPL30,TARDBP,XDH
GO:0006810	transport	7	331	8.07e-05	ENSGALP00000002839,ENSGALP00000003263,ENSGALP00000007526,ENSGALP00000010405,ENSGALP00000014260,ENSGALP00000017306,ENSGALP00000020445	ACTR2,CHMP4B,MYH9,MYO1A,SCP2,TF,XPO7
GO:0050789	regulation of biological process	11	1114	0.0001	ENSGALP00000002366,ENSGALP00000003263,ENSGALP00000006620,ENSGALP00000014260,ENSGALP00000018708,ENSGALP00000020445,ENSGALP00000034078,ENSGALP00000035658,ENSGALP00000038677,ENSGALP00000039379,ENSGALP00000042272	ACTR2,ADA,AGRN,CHMP4B,CNOT10,MOV10,MYH9,NME2,PGAM1,PSPC1,TARDBP
GO:0072521	purine-containing compound metabolic process	4	52	0.0001	ENSGALP00000006620,ENSGALP00000014144,ENSGALP00000034078,ENSGALP00000038677	ADA,NME2,PGAM1,XDH
GO:1901575	organic substance catabolic process	5	121	0.0001	ENSGALP00000003263,ENSGALP00000006620,ENSGALP00000009681,ENSGALP00000014144,ENSGALP00000038677	ADA,CHMP4B,PGAM1,PSMA1,XDH
GO:0018130	heterocycle biosynthetic process	7	368	0.00014	ENSGALP00000006620,ENSGALP00000014144,ENSGALP00000018708,ENSGALP00000034078,ENSGALP00000035658,ENSGALP00000038677,ENSGALP00000042272	ADA,CNOT10,NME2,PGAM1,PSPC1,TARDBP,XDH
GO:0019438	aromatic compound biosynthetic process	7	373	0.00014	ENSGALP00000006620,ENSGALP00000014144,ENSGALP00000018708,ENSGALP00000034078,ENSGALP00000035658,ENSGALP00000038677,ENSGALP00000042272	ADA,CNOT10,NME2,PGAM1,PSPC1,TARDBP,XDH
GO:0030036	actin cytoskeleton organization	4	58	0.00014	ENSGALP00000014260,ENSGALP00000020445,ENSGALP00000039379,ENSGALP00000042746	ACTR2,AGRN,MYH9,PDLIM4
GO:0044248	cellular catabolic process	5	131	0.00014	ENSGALP00000003263,ENSGALP00000006620,ENSGALP00000009681,ENSGALP00000014144,ENSGALP00000038677	ADA,CHMP4B,PGAM1,PSMA1,XDH
GO:0006139	nucleobase-containing compound metabolic process	8	553	0.00017	ENSGALP00000002366,ENSGALP00000006620,ENSGALP00000014144,ENSGALP00000018708,ENSGALP00000034078,ENSGALP00000035658,ENSGALP00000038677,ENSGALP00000042272	ADA,CNOT10,MOV10,NME2,PGAM1,PSPC1,TARDBP,XDH
GO:0034404	nucleobase-containing small molecule biosynthetic process	3	19	0.00019	ENSGALP00000006620,ENSGALP00000034078,ENSGALP00000038677	ADA,NME2,PGAM1
GO:0008104	protein localization	5	150	0.0002	ENSGALP00000002839,ENSGALP00000003263,ENSGALP00000011389,ENSGALP00000020445,ENSGALP00000039379	ACAP2,AGRN,CHMP4B,MYH9,XPO7
GO:1901565	organonitrogen compound catabolic process	4	70	0.00022	ENSGALP00000003263,ENSGALP00000006620,ENSGALP00000009681,ENSGALP00000014144	ADA,CHMP4B,PSMA1,XDH
GO:0055086	nucleobase-containing small molecule metabolic process	4	72	0.00024	ENSGALP00000006620,ENSGALP00000014144,ENSGALP00000034078,ENSGALP00000038677	ADA,NME2,PGAM1,XDH
GO:0050794	regulation of cellular process	10	1051	0.00031	ENSGALP00000003263,ENSGALP00000006620,ENSGALP00000014260,ENSGALP00000018708,ENSGALP00000020445,ENSGALP00000034078,ENSGALP00000035658,ENSGALP00000038677,ENSGALP00000039379,ENSGALP00000042272	ACTR2,ADA,AGRN,CHMP4B,CNOT10,MYH9,NME2,PGAM1,PSPC1,TARDBP
GO:0048519	negative regulation of biological process	7	453	0.00036	ENSGALP00000002366,ENSGALP00000003263,ENSGALP00000006620,ENSGALP00000018708,ENSGALP00000034078,ENSGALP00000035658,ENSGALP00000039379	ADA,AGRN,CHMP4B,CNOT10,MOV10,NME2,PSPC1
GO:0007018	microtubule-based movement	3	26	0.00038	ENSGALP00000007526,ENSGALP00000014260,ENSGALP00000020445	ACTR2,MYH9,MYO1A
GO:1901566	organonitrogen compound biosynthetic process	5	177	0.00038	ENSGALP00000006620,ENSGALP00000013355,ENSGALP00000014144,ENSGALP00000034078,ENSGALP00000038677	ADA,NME2,PGAM1,RPL30,XDH
GO:0034613	cellular protein localization	4	95	0.00057	ENSGALP00000002839,ENSGALP00000003263,ENSGALP00000011389,ENSGALP00000039379	ACAP2,AGRN,CHMP4B,XPO7
GO:0046129	purine ribonucleoside biosynthetic process	2	3	0.00057	ENSGALP00000006620,ENSGALP00000034078	ADA,NME2
GO:0065008	regulation of biological quality	6	330	0.00057	ENSGALP00000003263,ENSGALP00000010405,ENSGALP00000014260,ENSGALP00000020445,ENSGALP00000039379,ENSGALP00000039731	ACE,ACTR2,AGRN,CHMP4B,MYH9,TF
GO:0046907	intracellular transport	4	97	0.00058	ENSGALP00000002839,ENSGALP00000003263,ENSGALP00000007526,ENSGALP00000014260	ACTR2,CHMP4B,MYO1A,XPO7
GO:0044260	cellular macromolecule metabolic process	8	721	0.00074	ENSGALP00000003263,ENSGALP00000006885,ENSGALP00000009681,ENSGALP00000013355,ENSGALP00000018708,ENSGALP00000026345,ENSGALP00000035658,ENSGALP00000042272	ACP1,CHMP4B,CNOT10,P4HA1,PSMA1,PSPC1,RPL30,TARDBP
GO:0072523	purine-containing compound catabolic process	2	4	0.00074	ENSGALP00000006620,ENSGALP00000014144	ADA,XDH
GO:0034654	nucleobase-containing compound biosynthetic process	6	357	0.00078	ENSGALP00000006620,ENSGALP00000018708,ENSGALP00000034078,ENSGALP00000035658,ENSGALP00000038677,ENSGALP00000042272	ADA,CNOT10,NME2,PGAM1,PSPC1,TARDBP
GO:0006796	phosphate-containing compound metabolic process	5	218	0.00083	ENSGALP00000006620,ENSGALP00000013585,ENSGALP00000026345,ENSGALP00000034078,ENSGALP00000038677	ACP1,ADA,CKMT1A,NME2,PGAM1
GO:0046700	heterocycle catabolic process	3	39	0.00092	ENSGALP00000006620,ENSGALP00000014144,ENSGALP00000038677	ADA,PGAM1,XDH
GO:0006144	purine nucleobase metabolic process	2	5	0.00096	ENSGALP00000006620,ENSGALP00000014144	ADA,XDH
GO:0019439	aromatic compound catabolic process	3	40	0.00096	ENSGALP00000006620,ENSGALP00000014144,ENSGALP00000038677	ADA,PGAM1,XDH
GO:0044270	cellular nitrogen compound catabolic process	3	40	0.00096	ENSGALP00000006620,ENSGALP00000014144,ENSGALP00000038677	ADA,PGAM1,XDH
GO:1901293	nucleoside phosphate biosynthetic process	3	41	0.00096	ENSGALP00000006620,ENSGALP00000034078,ENSGALP00000038677	ADA,NME2,PGAM1
GO:1901361	organic cyclic compound catabolic process	3	40	0.00096	ENSGALP00000006620,ENSGALP00000014144,ENSGALP00000038677	ADA,PGAM1,XDH
GO:0016126	sterol biosynthetic process	2	6	0.0011	ENSGALP00000008475,ENSGALP00000023936	CYB5R2,HMGCS1
GO:0019730	antimicrobial humoral response	2	6	0.0011	ENSGALP00000010405,ENSGALP00000013355	RPL30,TF
GO:0030048	actin filament-based movement	2	6	0.0011	ENSGALP00000007526,ENSGALP00000020445	MYH9,MYO1A
GO:0046128	purine ribonucleoside metabolic process	2	7	0.0014	ENSGALP00000006620,ENSGALP00000034078	ADA,NME2
GO:0061640	cytoskeleton-dependent cytokinesis	2	7	0.0014	ENSGALP00000003263,ENSGALP00000014260	ACTR2,CHMP4B
GO:0019222	regulation of metabolic process	7	674	0.0025	ENSGALP00000002366,ENSGALP00000003263,ENSGALP00000018708,ENSGALP00000035658,ENSGALP00000038677,ENSGALP00000039379,ENSGALP00000042272	AGRN,CHMP4B,CNOT10,MOV10,PGAM1,PSPC1,TARDBP
GO:0051303	establishment of chromosome localization	2	11	0.0027	ENSGALP00000003263,ENSGALP00000014260	ACTR2,CHMP4B
GO:0071702	organic substance transport	4	165	0.0027	ENSGALP00000002839,ENSGALP00000003263,ENSGALP00000017306,ENSGALP00000020445	CHMP4B,MYH9,SCP2,XPO7
GO:0016071	mRNA metabolic process	3	66	0.0028	ENSGALP00000002366,ENSGALP00000035658,ENSGALP00000042272	MOV10,PSPC1,TARDBP
GO:0009117	nucleotide metabolic process	3	68	0.003	ENSGALP00000006620,ENSGALP00000034078,ENSGALP00000038677	ADA,NME2,PGAM1
GO:0006165	nucleoside diphosphate phosphorylation	2	14	0.0037	ENSGALP00000034078,ENSGALP00000038677	NME2,PGAM1
GO:0006996	organelle organization	5	345	0.0041	ENSGALP00000003263,ENSGALP00000014260,ENSGALP00000020445,ENSGALP00000039379,ENSGALP00000042746	ACTR2,AGRN,CHMP4B,MYH9,PDLIM4
GO:0031047	gene silencing by RNA	2	15	0.0041	ENSGALP00000002366,ENSGALP00000018708	CNOT10,MOV10
GO:1901137	carbohydrate derivative biosynthetic process	3	77	0.0041	ENSGALP00000006620,ENSGALP00000034078,ENSGALP00000038677	ADA,NME2,PGAM1
GO:0009206	purine ribonucleoside triphosphate biosynthetic process	2	17	0.0048	ENSGALP00000034078,ENSGALP00000038677	NME2,PGAM1
GO:0016125	sterol metabolic process	2	17	0.0048	ENSGALP00000008475,ENSGALP00000023936	CYB5R2,HMGCS1
GO:0044087	regulation of cellular component biogenesis	3	84	0.0048	ENSGALP00000003263,ENSGALP00000014260,ENSGALP00000039379	ACTR2,AGRN,CHMP4B
GO:0044267	cellular protein metabolic process	5	366	0.0049	ENSGALP00000003263,ENSGALP00000006885,ENSGALP00000009681,ENSGALP00000013355,ENSGALP00000026345	ACP1,CHMP4B,P4HA1,PSMA1,RPL30
GO:0006955	immune response	3	90	0.0055	ENSGALP00000010405,ENSGALP00000013355,ENSGALP00000014260	ACTR2,RPL30,TF
GO:0051128	regulation of cellular component organization	4	219	0.0061	ENSGALP00000003263,ENSGALP00000014260,ENSGALP00000020445,ENSGALP00000039379	ACTR2,AGRN,CHMP4B,MYH9
GO:0030099	myeloid cell differentiation	2	22	0.0067	ENSGALP00000020445,ENSGALP00000039731	ACE,MYH9
GO:0010033	response to organic substance	4	230	0.0069	ENSGALP00000010405,ENSGALP00000011389,ENSGALP00000014260,ENSGALP00000039379	ACAP2,ACTR2,AGRN,TF
GO:0006952	defense response	3	103	0.0071	ENSGALP00000010405,ENSGALP00000013355,ENSGALP00000014260	ACTR2,RPL30,TF
GO:0022607	cellular component assembly	4	234	0.0071	ENSGALP00000003263,ENSGALP00000014260,ENSGALP00000020445,ENSGALP00000039379	ACTR2,AGRN,CHMP4B,MYH9
GO:0044419	interspecies interaction between organisms	2	23	0.0071	ENSGALP00000003263,ENSGALP00000013355	CHMP4B,RPL30
GO:0055114	oxidation-reduction process	3	102	0.0071	ENSGALP00000006885,ENSGALP00000008475,ENSGALP00000014144	CYB5R2,P4HA1,XDH
GO:0098813	nuclear chromosome segregation	2	23	0.0071	ENSGALP00000003263,ENSGALP00000014260	ACTR2,CHMP4B
GO:0120031	plasma membrane bounded cell projection assembly	2	23	0.0071	ENSGALP00000014260,ENSGALP00000039379	ACTR2,AGRN
GO:0048523	negative regulation of cellular process	5	414	0.0073	ENSGALP00000003263,ENSGALP00000006620,ENSGALP00000034078,ENSGALP00000035658,ENSGALP00000039379	ADA,AGRN,CHMP4B,NME2,PSPC1
GO:0009168	purine ribonucleoside monophosphate biosynthetic process	2	25	0.0078	ENSGALP00000006620,ENSGALP00000038677	ADA,PGAM1
GO:0009892	negative regulation of metabolic process	4	249	0.0082	ENSGALP00000002366,ENSGALP00000003263,ENSGALP00000018708,ENSGALP00000035658	CHMP4B,CNOT10,MOV10,PSPC1
GO:0015031	protein transport	3	110	0.0082	ENSGALP00000002839,ENSGALP00000003263,ENSGALP00000020445	CHMP4B,MYH9,XPO7
GO:0031323	regulation of cellular metabolic process	6	645	0.0082	ENSGALP00000003263,ENSGALP00000018708,ENSGALP00000035658,ENSGALP00000038677,ENSGALP00000039379,ENSGALP00000042272	AGRN,CHMP4B,CNOT10,PGAM1,PSPC1,TARDBP
GO:0032501	multicellular organismal process	6	644	0.0082	ENSGALP00000003263,ENSGALP00000020445,ENSGALP00000029849,ENSGALP00000039379,ENSGALP00000039731,ENSGALP00000042746	ACE,AGRN,CHMP4B,MYH9,PDLIM4,PRSS2
GO:0060255	regulation of macromolecule metabolic process	6	645	0.0082	ENSGALP00000002366,ENSGALP00000018708,ENSGALP00000035658,ENSGALP00000038677,ENSGALP00000039379,ENSGALP00000042272	AGRN,CNOT10,MOV10,PGAM1,PSPC1,TARDBP
GO:0000280	nuclear division	2	28	0.0088	ENSGALP00000003263,ENSGALP00000014260	ACTR2,CHMP4B
GO:0009152	purine ribonucleotide biosynthetic process	2	29	0.0091	ENSGALP00000034078,ENSGALP00000038677	NME2,PGAM1
GO:0043547	positive regulation of GTPase activity	2	30	0.0095	ENSGALP00000011389,ENSGALP00000039379	ACAP2,AGRN
GO:0072657	protein localization to membrane	2	30	0.0095	ENSGALP00000003263,ENSGALP00000039379	AGRN,CHMP4B
GO:0042592	homeostatic process	3	125	0.0102	ENSGALP00000003263,ENSGALP00000010405,ENSGALP00000039731	ACE,CHMP4B,TF
GO:0051704	multi-organism process	3	126	0.0103	ENSGALP00000003263,ENSGALP00000010405,ENSGALP00000013355	CHMP4B,RPL30,TF
GO:0019219	regulation of nucleobase-containing compound metabolic process	5	469	0.0104	ENSGALP00000018708,ENSGALP00000035658,ENSGALP00000038677,ENSGALP00000039379,ENSGALP00000042272	AGRN,CNOT10,PGAM1,PSPC1,TARDBP
GO:0006091	generation of precursor metabolites and energy	2	34	0.0114	ENSGALP00000014144,ENSGALP00000038677	PGAM1,XDH
GO:0048518	positive regulation of biological process	5	481	0.0114	ENSGALP00000003263,ENSGALP00000014260,ENSGALP00000034078,ENSGALP00000035658,ENSGALP00000039379	ACTR2,AGRN,CHMP4B,NME2,PSPC1
GO:0009205	purine ribonucleoside triphosphate metabolic process	2	35	0.0117	ENSGALP00000034078,ENSGALP00000038677	NME2,PGAM1
GO:0016310	phosphorylation	3	136	0.012	ENSGALP00000013585,ENSGALP00000034078,ENSGALP00000038677	CKMT1A,NME2,PGAM1
GO:0034655	nucleobase-containing compound catabolic process	2	36	0.0121	ENSGALP00000006620,ENSGALP00000038677	ADA,PGAM1
GO:0010468	regulation of gene expression	5	503	0.0129	ENSGALP00000002366,ENSGALP00000018708,ENSGALP00000035658,ENSGALP00000039379,ENSGALP00000042272	AGRN,CNOT10,MOV10,PSPC1,TARDBP
GO:0051603	proteolysis involved in cellular protein catabolic process	2	39	0.0136	ENSGALP00000003263,ENSGALP00000009681	CHMP4B,PSMA1
GO:0033365	protein localization to organelle	2	40	0.0142	ENSGALP00000003263,ENSGALP00000011389	ACAP2,CHMP4B
GO:0065003	protein-containing complex assembly	3	148	0.0142	ENSGALP00000003263,ENSGALP00000020445,ENSGALP00000039379	AGRN,CHMP4B,MYH9
GO:0009167	purine ribonucleoside monophosphate metabolic process	2	41	0.0145	ENSGALP00000006620,ENSGALP00000038677	ADA,PGAM1
GO:0034248	regulation of cellular amide metabolic process	2	41	0.0145	ENSGALP00000018708,ENSGALP00000038677	CNOT10,PGAM1
GO:0061024	membrane organization	2	42	0.0147	ENSGALP00000003263,ENSGALP00000039379	AGRN,CHMP4B
GO:0010629	negative regulation of gene expression	3	156	0.0156	ENSGALP00000002366,ENSGALP00000018708,ENSGALP00000035658	CNOT10,MOV10,PSPC1
GO:0010608	posttranscriptional regulation of gene expression	2	45	0.0163	ENSGALP00000002366,ENSGALP00000018708	CNOT10,MOV10
GO:0009617	response to bacterium	2	46	0.0167	ENSGALP00000010405,ENSGALP00000013355	RPL30,TF
GO:0006886	intracellular protein transport	2	47	0.0172	ENSGALP00000002839,ENSGALP00000003263	CHMP4B,XPO7
GO:0051129	negative regulation of cellular component organization	2	47	0.0172	ENSGALP00000003263,ENSGALP00000039379	AGRN,CHMP4B
GO:0008380	RNA splicing	2	48	0.0178	ENSGALP00000035658,ENSGALP00000042272	PSPC1,TARDBP
GO:0044089	positive regulation of cellular component biogenesis	2	48	0.0178	ENSGALP00000014260,ENSGALP00000039379	ACTR2,AGRN
GO:0009150	purine ribonucleotide metabolic process	2	49	0.0183	ENSGALP00000034078,ENSGALP00000038677	NME2,PGAM1
GO:0031329	regulation of cellular catabolic process	2	51	0.0191	ENSGALP00000003263,ENSGALP00000038677	CHMP4B,PGAM1
GO:0051493	regulation of cytoskeleton organization	2	54	0.0209	ENSGALP00000003263,ENSGALP00000014260	ACTR2,CHMP4B
GO:0071310	cellular response to organic substance	3	183	0.0215	ENSGALP00000011389,ENSGALP00000014260,ENSGALP00000039379	ACAP2,ACTR2,AGRN
GO:0006397	mRNA processing	2	56	0.0221	ENSGALP00000035658,ENSGALP00000042272	PSPC1,TARDBP
GO:0016070	RNA metabolic process	4	403	0.0284	ENSGALP00000002366,ENSGALP00000018708,ENSGALP00000035658,ENSGALP00000042272	CNOT10,MOV10,PSPC1,TARDBP
GO:0017144	drug metabolic process	2	68	0.0305	ENSGALP00000006620,ENSGALP00000038677	ADA,PGAM1
GO:0006355	regulation of transcription, DNA-templated	4	423	0.033	ENSGALP00000018708,ENSGALP00000035658,ENSGALP00000039379,ENSGALP00000042272	AGRN,CNOT10,PSPC1,TARDBP
GO:0042493	response to drug	2	74	0.0348	ENSGALP00000010405,ENSGALP00000039379	AGRN,TF
GO:0034645	cellular macromolecule biosynthetic process	4	438	0.0358	ENSGALP00000013355,ENSGALP00000018708,ENSGALP00000035658,ENSGALP00000042272	CNOT10,PSPC1,RPL30,TARDBP
GO:0010467	gene expression	4	440	0.0362	ENSGALP00000013355,ENSGALP00000018708,ENSGALP00000035658,ENSGALP00000042272	CNOT10,PSPC1,RPL30,TARDBP
GO:0050793	regulation of developmental process	3	231	0.0363	ENSGALP00000020445,ENSGALP00000034078,ENSGALP00000039379	AGRN,MYH9,NME2
GO:0051252	regulation of RNA metabolic process	4	447	0.0375	ENSGALP00000018708,ENSGALP00000035658,ENSGALP00000039379,ENSGALP00000042272	AGRN,CNOT10,PSPC1,TARDBP
GO:0006082	organic acid metabolic process	2	82	0.0402	ENSGALP00000014144,ENSGALP00000038677	PGAM1,XDH
GO:0050896	response to stimulus	5	718	0.041	ENSGALP00000010405,ENSGALP00000011389,ENSGALP00000013355,ENSGALP00000014260,ENSGALP00000039379	ACAP2,ACTR2,AGRN,RPL30,TF
GO:0060548	negative regulation of cell death	2	87	0.044	ENSGALP00000003263,ENSGALP00000034078	CHMP4B,NME2

[truncated: 4 more sheets: GO CF-up 10d, GO CF-down 10d, GO C2-up 10d, GO-C2-down 10d]
